# Supplementary material
Source: PubMed Central journal article supplement (PMC3448441)
Supplement: NIHMS403866-supplement-Table_1.pdf [file NIHMS403866-supplement-Table_1.pdf]

Fraction Count Protein Reference Peptide Count MaxOfXC MaxOfDe First( Accessior  
90

12

Complement C3 precursor [Contains: Complement C3 beta chain; Complement C3 alp

|                           |                      |   |        |        |  |                        |
|---------------------------|----------------------|---|--------|--------|--|------------------------|
| <a href="#">CO3_HUMAN</a> | K.GYTQQLAFR.Q        | 1 | 2.6592 | 0.2376 |  | <a href="#">P01024</a> |
| <a href="#">CO3_HUMAN</a> | R.SNLDEDIIAEENIVSR.S | 2 | 4.5692 | 0.5706 |  | <a href="#">P01024</a> |
| <a href="#">CO3_HUMAN</a> | R.IPIEDGSGEVVLSR.K   | 1 | 3.9318 | 0.6333 |  | <a href="#">P01024</a> |
| <a href="#">CO3_HUMAN</a> | K.VLLDGVQNPR.A       | 2 | 3.4394 | 0.5621 |  | <a href="#">P01024</a> |
| <a href="#">CO3_HUMAN</a> | K.SGSDEVQVGQQR.T     | 1 | 3.8062 | 0.3043 |  | <a href="#">P01024</a> |
| <a href="#">CO3_HUMAN</a> | K.SDDKVTLEER.L       | 1 | 2.994  | 0.2781 |  | <a href="#">P01024</a> |
| <a href="#">CO3_HUMAN</a> | K.KQELSEAEQATR.T     | 2 | 3.7276 | 0.4363 |  | <a href="#">P01024</a> |
| <a href="#">CO3_HUMAN</a> | K.AGDFLEANYMNLQR.S   | 1 | 3.9738 | 0.3282 |  | <a href="#">P01024</a> |
| <a href="#">CO3_HUMAN</a> | K.QELSEAEQATR.T      | 1 | 2.8849 | 0.4095 |  | <a href="#">P01024</a> |

8

Complement component C9 precursor [Contains: Complement component C9a; Compl

|                           |                  |   |        |        |  |                        |
|---------------------------|------------------|---|--------|--------|--|------------------------|
| <a href="#">CO9_HUMAN</a> | R.VVEESELAR.T    | 2 | 2.8556 | 0.4705 |  | <a href="#">P02748</a> |
| <a href="#">CO9_HUMAN</a> | R.DRVVEESELAR.T  | 1 | 3.7524 | 0.4644 |  | <a href="#">P02748</a> |
| <a href="#">CO9_HUMAN</a> | R.DGNTLTYR.R     | 1 | 2.5406 | 0.283  |  | <a href="#">P02748</a> |
| <a href="#">CO9_HUMAN</a> | R.AIEDYINEFSVR.K | 2 | 4.1252 | 0.5592 |  | <a href="#">P02748</a> |
| <a href="#">CO9_HUMAN</a> | K.TSNFNAAISLK.F  | 2 | 3.3066 | 0.4952 |  | <a href="#">P02748</a> |

7

Serum albumin precursor - Homo sapiens (Human)

|                            |                    |   |        |        |   |                        |
|----------------------------|--------------------|---|--------|--------|---|------------------------|
| <a href="#">ALBU_HUMAN</a> | K.FQNALLVR.Y       | 1 | 2.602  | 0.2615 | 2 | <a href="#">P02768</a> |
| <a href="#">ALBU_HUMAN</a> | K.AVMDDFAAFVEK.C   | 1 | 3.3546 | 0.5289 | 2 | <a href="#">P02768</a> |
| <a href="#">ALBU_HUMAN</a> | K.LVNEVTEFAK.T     | 1 | 3.2914 | 0.5163 | 2 | <a href="#">P02768</a> |
| <a href="#">ALBU_HUMAN</a> | K.KLVAASQAALGL.-   | 1 | 2.7916 | 0.4564 | 1 | <a href="#">P02768</a> |
| <a href="#">ALBU_HUMAN</a> | K.VPQVSTPTLVEVSR.N | 1 | 3.4955 | 0.522  | 2 | <a href="#">P02768</a> |
| <a href="#">ALBU_HUMAN</a> | K.LVAASQAALGL.-    | 1 | 2.8618 | 0.6146 | 1 | <a href="#">P02768</a> |
| <a href="#">ALBU_HUMAN</a> | K.KQTALVELVK.H     | 1 | 2.4147 | 0.3919 | 2 | <a href="#">P02768</a> |

6

Apolipoprotein A-I precursor (Apo-AI) (ApoA-I) [Contains: Apolipoprotein A-I(1-242)] - H

|                             |                    |   |        |        |  |                        |
|-----------------------------|--------------------|---|--------|--------|--|------------------------|
| <a href="#">APOA1_HUMAN</a> | K.LLDNWDSVTSTFSK.L | 2 | 4.2535 | 0.5512 |  | <a href="#">P02647</a> |
| <a href="#">APOA1_HUMAN</a> | K.DLATVYVDVLK.D    | 1 | 2.9673 | 0.5165 |  | <a href="#">P02647</a> |
| <a href="#">APOA1_HUMAN</a> | K.WQEEM*ELYR.Q     | 1 | 3.2165 | 0.4247 |  | <a href="#">P02647</a> |
| <a href="#">APOA1_HUMAN</a> | R.DYVSQFEGSALGK.Q  | 1 | 4.0101 | 0.5763 |  | <a href="#">P02647</a> |
| <a href="#">APOA1_HUMAN</a> | K.ATEHLSTLSEK.A    | 1 | 2.7592 | 0.4283 |  | <a href="#">P02647</a> |

3

Serum amyloid P-component precursor (SAP) (9.5S alpha-1-glycoprotein) [Contains: S

|                            |                  |   |        |        |  |                        |
|----------------------------|------------------|---|--------|--------|--|------------------------|
| <a href="#">SAMP_HUMAN</a> | R.VGEYSLYIGR.H   | 1 | 2.9871 | 0.5439 |  | <a href="#">P02743</a> |
| <a href="#">SAMP_HUMAN</a> | R.QGYFVEAQPK.I   | 1 | 2.6943 | 0.4268 |  | <a href="#">P02743</a> |
| <a href="#">SAMP_HUMAN</a> | R.AYSLFSYNTQGR.D | 1 | 2.8854 | 0.4212 |  | <a href="#">P02743</a> |

2

Alpha-2-macroglobulin precursor (Alpha-2-M) - Homo sapiens (Human)

|                            |                 |   |        |        |  |                        |
|----------------------------|-----------------|---|--------|--------|--|------------------------|
| <a href="#">A2MG_HUMAN</a> | K.AIGYLNTGYQR.Q | 1 | 2.9575 | 0.3723 |  | <a href="#">P01023</a> |
| <a href="#">A2MG_HUMAN</a> | R.VGFYESDVMGR.G | 1 | 3.2578 | 0.4841 |  | <a href="#">P01023</a> |

Ig alpha-2 chain C region - Homo sapiens (Human)

|                             |                       |   |        |        |    |                        |
|-----------------------------|-----------------------|---|--------|--------|----|------------------------|
| <a href="#">IGHA2_HUMAN</a> | R.WLQGSQELPR.E        | 1 | 3.1245 | 0.3647 | 23 | <a href="#">P01877</a> |
| <a href="#">IGHA2_HUMAN</a> | R.QEPSQGTTTFAVTSILR.V | 1 | 3.5351 | 0.508  | 21 | <a href="#">P01877</a> |

IGHA1 protein - Homo sapiens (Human)

|                                                                                           |                    |   |        |        |    |                        |
|-------------------------------------------------------------------------------------------|--------------------|---|--------|--------|----|------------------------|
| <a href="#">Q8N5K4_HUMAN</a>                                                              | R.DASGVTFWTPSSGK.S | 1 | 4.5705 | 0.4937 | 12 | <a href="#">Q8N5K4</a> |
| <a href="#">Q8N5K4_HUMAN</a>                                                              | K.TPLTATLSK.S      | 1 | 2.5677 | 0.4692 | 11 | <a href="#">Q8N5K4</a> |
| Inter-alpha-trypsin inhibitor heavy chain H4 precursor (ITI heavy chain H4) (Inter-alpha- |                    |   |        |        |    |                        |
| <a href="#">ITIH4_HUMAN</a>                                                               | R.GPDVLTATVSGK.L   | 1 | 3.2619 | 0.4863 | 1  | <a href="#">Q14624</a> |
| <a href="#">ITIH4_HUMAN</a>                                                               | K.GSEMVVAGK.L      | 1 | 2.4321 | 0.3519 | 1  | <a href="#">Q14624</a> |

1

|                                                                                                      |                          |   |        |        |    |                        |
|------------------------------------------------------------------------------------------------------|--------------------------|---|--------|--------|----|------------------------|
| Alpha-2-HS-glycoprotein precursor (Fetuin-A) (Alpha-2-Z-globulin) (Ba-alpha-2-glycoprotein)          |                          |   |        |        |    |                        |
| <a href="#">FETUA_HUMAN</a>                                                                          | K.HTLNQIDEVK.V           | 1 | 3.7801 | 0.5268 |    | <a href="#">P02765</a> |
| Apolipoprotein A-II precursor (ApoA-II) (ApoA-II) [Contains: Apolipoprotein A-II(1-76)] -            |                          |   |        |        |    |                        |
| <a href="#">APOA2_HUMAN</a>                                                                          | K.SPELQAEAK.S            | 1 | 2.7774 | 0.3417 |    | <a href="#">P02652</a> |
| Ciliary dynein heavy chain 5 (Axonemal beta dynein heavy chain 5) (HL1) - Homo sapiens               |                          |   |        |        |    |                        |
| <a href="#">DYH5_HUMAN</a>                                                                           | K.RTYSGVSDLLDVSSGSQW.K   | 1 | 3.0295 | 0.1935 |    | <a href="#">Q8TE73</a> |
| Haptoglobin-related protein precursor - Homo sapiens (Human)                                         |                          |   |        |        |    |                        |
| <a href="#">HPTR_HUMAN</a>                                                                           | R.ILGGHLDAK.G            | 1 | 2.4098 | 0.1878 | 3  | <a href="#">P00739</a> |
| Hypothetical protein - Homo sapiens (Human)                                                          |                          |   |        |        |    |                        |
| <a href="#">A0A5E5_HUMAN</a>                                                                         | K.VDNALQSGNSQESVTEQDSK.1 | 1 | 4.3425 | 0.5963 | 20 | <a href="#">A0A5E5</a> |
| Immunoglobulin J chain - Homo sapiens (Human)                                                        |                          |   |        |        |    |                        |
| <a href="#">IGJ_HUMAN</a>                                                                            | R.SSEDPNEDIVER.N         | 1 | 3.1102 | 0.2857 |    | <a href="#">P01591</a> |
| Kininogen-1 precursor (Alpha-2-thiol proteinase inhibitor) [Contains: Kininogen-1 heavy chain]       |                          |   |        |        |    |                        |
| <a href="#">KNG1_HUMAN</a>                                                                           | R.PPGFSPFR.S             | 1 | 2.4683 | 0.3416 | 1  | <a href="#">P01042</a> |
| Myosin-reactive immunoglobulin heavy chain variable region (Fragment) - Homo sapiens                 |                          |   |        |        |    |                        |
| <a href="#">Q9UL94_HUMAN</a>                                                                         | -.EVQLVESGAEVK.K         | 1 | 2.9892 | 0.3708 | 2  | <a href="#">Q9UL94</a> |
| Postreplication repair protein RAD18 (hRAD18) (hHR18) (RING finger protein 73) - Homo sapiens        |                          |   |        |        |    |                        |
| <a href="#">RAD18_HUMAN</a>                                                                          | K.EASPAAK.T              | 1 | 2.2602 | 0.1046 |    | <a href="#">Q9NS91</a> |
| Transthyretin precursor (Prealbumin) (TBPA) (TTR) (ATTR) - Homo sapiens (Human)                      |                          |   |        |        |    |                        |
| <a href="#">TTHY_HUMAN</a>                                                                           | K.AADDTWEPFASGK.T        | 1 | 4.8619 | 0.6225 |    | <a href="#">P02766</a> |
| Tribbles homolog 3 (TRB-3) (Neuronal cell death-inducible putative kinase) (p65-interacting protein) |                          |   |        |        |    |                        |
| <a href="#">TRIB3_HUMAN</a>                                                                          | K.VYPVQEALAVLEPYAR.L     | 1 | 2.6096 | 0.0819 |    | <a href="#">Q96RU7</a> |

91

64

|                                                                                         |                           |   |        |        |  |                        |
|-----------------------------------------------------------------------------------------|---------------------------|---|--------|--------|--|------------------------|
| Complement C3 precursor [Contains: Complement C3 beta chain; Complement C3 alpha chain] |                           |   |        |        |  |                        |
| <a href="#">CO3_HUMAN</a>                                                               | K.RIPIEDGSGEVVLSRK.V      | 1 | 3.8845 | 0.343  |  | <a href="#">P01024</a> |
| <a href="#">CO3_HUMAN</a>                                                               | K.TGLQEVEVK.A             | 1 | 3.5366 | 0.4136 |  | <a href="#">P01024</a> |
| <a href="#">CO3_HUMAN</a>                                                               | K.SLYVSATVILHSGSDMVQAER.1 | 1 | 5.493  | 0.6292 |  | <a href="#">P01024</a> |
| <a href="#">CO3_HUMAN</a>                                                               | K.SGSDEVQVGQQR.T          | 2 | 4.0746 | 0.3779 |  | <a href="#">P01024</a> |
| <a href="#">CO3_HUMAN</a>                                                               | K.SGQSEDRQPVPVGGQMTLK.I   | 1 | 4.7844 | 0.5098 |  | <a href="#">P01024</a> |
| <a href="#">CO3_HUMAN</a>                                                               | K.SDDKVTLEERLDK.A         | 2 | 3.5921 | 0.2749 |  | <a href="#">P01024</a> |
| <a href="#">CO3_HUMAN</a>                                                               | K.GYTQQLAFRQPSSAFAAFVK.1  | 1 | 4.2829 | 0.6315 |  | <a href="#">P01024</a> |
| <a href="#">CO3_HUMAN</a>                                                               | K.YFKPGMPFDLMVFVTNPDGS.1  | 1 | 3.7322 | 0.3458 |  | <a href="#">P01024</a> |
| <a href="#">CO3_HUMAN</a>                                                               | K.SDDKVTLEER.L            | 1 | 2.8225 | 0.2462 |  | <a href="#">P01024</a> |
| <a href="#">CO3_HUMAN</a>                                                               | K.VLLDGVQNPRA.A           | 1 | 3.6992 | 0.5598 |  | <a href="#">P01024</a> |
| <a href="#">CO3_HUMAN</a>                                                               | K.RIPIEDGSGEVVLSRK.K      | 2 | 4.1091 | 0.4762 |  | <a href="#">P01024</a> |
| <a href="#">CO3_HUMAN</a>                                                               | K.QELSEAEQATR.T           | 1 | 3.3061 | 0.4311 |  | <a href="#">P01024</a> |
| <a href="#">CO3_HUMAN</a>                                                               | K.LMNIFLK.D               | 1 | 2.4936 | 0.1912 |  | <a href="#">P01024</a> |
| <a href="#">CO3_HUMAN</a>                                                               | K.KVEGTAFVIFGIQDGEQR.I    | 1 | 4.2464 | 0.5103 |  | <a href="#">P01024</a> |
| <a href="#">CO3_HUMAN</a>                                                               | K.KGYTQQLAFR.Q            | 1 | 2.9878 | 0.4496 |  | <a href="#">P01024</a> |
| <a href="#">CO3_HUMAN</a>                                                               | R.AYYENSPQQVFSTEFQVK.E    | 1 | 2.8735 | 0.4886 |  | <a href="#">P01024</a> |
| <a href="#">CO3_HUMAN</a>                                                               | K.GYTQQLAFR.Q             | 1 | 2.6313 | 0.1501 |  | <a href="#">P01024</a> |
| <a href="#">CO3_HUMAN</a>                                                               | K.GQGTLVVVTMYHAK.A        | 1 | 3.7409 | 0.5828 |  | <a href="#">P01024</a> |
| <a href="#">CO3_HUMAN</a>                                                               | K.EDIPPADLSDQVPDTESETR.I  | 1 | 4.3681 | 0.6092 |  | <a href="#">P01024</a> |

|                           |                         |   |        |        |                        |
|---------------------------|-------------------------|---|--------|--------|------------------------|
| <a href="#">CO3_HUMAN</a> | K.AGDFLEANYM*NLQR.S     | 1 | 3.8626 | 0.3722 | <a href="#">P01024</a> |
| <a href="#">CO3_HUMAN</a> | R.VVLVAVDKGVFVLNKK.N    | 1 | 2.4002 | 0.2343 | <a href="#">P01024</a> |
| <a href="#">CO3_HUMAN</a> | K.KQELSEAEQATR.T        | 2 | 4.1268 | 0.3936 | <a href="#">P01024</a> |
| <a href="#">CO3_HUMAN</a> | R.SEETKENEGFTVTAEGK.G   | 1 | 4.8514 | 0.5502 | <a href="#">P01024</a> |
| <a href="#">CO3_HUMAN</a> | R.VPVAVQGEDTVQSLTQGDGV  | 1 | 4.6844 | 0.6958 | <a href="#">P01024</a> |
| <a href="#">CO3_HUMAN</a> | R.TKKQELSEAEQATR.T      | 4 | 4.6184 | 0.5866 | <a href="#">P01024</a> |
| <a href="#">CO3_HUMAN</a> | R.SYTVAIAGYALAQMGR.L    | 1 | 3.3546 | 0.5733 | <a href="#">P01024</a> |
| <a href="#">CO3_HUMAN</a> | R.TVMVNIENPEGIPVK.Q     | 1 | 2.6338 | 0.361  | <a href="#">P01024</a> |
| <a href="#">CO3_HUMAN</a> | R.SGIPIVTSPTYQIHFTK.T   | 1 | 3.5273 | 0.5743 | <a href="#">P01024</a> |
| <a href="#">CO3_HUMAN</a> | R.EGVQKEDIPPADLSDQVPDTE | 6 | 5.5359 | 0.6864 | <a href="#">P01024</a> |
| <a href="#">CO3_HUMAN</a> | R.RHQQTVTIPPK.S         | 1 | 3.5754 | 0.3989 | <a href="#">P01024</a> |
| <a href="#">CO3_HUMAN</a> | R.QVREPGQDLVVLPLSITDFIF | 1 | 4.3441 | 0.5452 | <a href="#">P01024</a> |
| <a href="#">CO3_HUMAN</a> | R.MDKVGKYPK.E           | 1 | 2.424  | 0.2547 | <a href="#">P01024</a> |
| <a href="#">CO3_HUMAN</a> | R.HQQTVTIPPK.S          | 2 | 2.8683 | 0.4194 | <a href="#">P01024</a> |
| <a href="#">CO3_HUMAN</a> | R.KVLLDGVQNP.R.A        | 1 | 3.8239 | 0.3776 | <a href="#">P01024</a> |
| <a href="#">CO3_HUMAN</a> | R.IPIEDGSGEVVLSRK.V     | 1 | 3.7483 | 0.3919 | <a href="#">P01024</a> |
| <a href="#">CO3_HUMAN</a> | R.IPIEDGSGEVVLSR.K      | 6 | 4.3342 | 0.6088 | <a href="#">P01024</a> |
| <a href="#">CO3_HUMAN</a> | R.ILLQGTPVAQMTEDAVERL   | 2 | 4.4566 | 0.6632 | <a href="#">P01024</a> |
| <a href="#">CO3_HUMAN</a> | R.ILLQGTPVAQMTEDAVERL   | 2 | 5.8418 | 0.6211 | <a href="#">P01024</a> |
| <a href="#">CO3_HUMAN</a> | R.ILLQGTPVAQM*TEDAVER   | 1 | 2.8474 | 0.5221 | <a href="#">P01024</a> |
| <a href="#">CO3_HUMAN</a> | R.ILLQGTPVAQM*TEDAVER   | 1 | 5.154  | 0.661  | <a href="#">P01024</a> |
| <a href="#">CO3_HUMAN</a> | R.LVAYYTLIGASGQR.E      | 1 | 2.5677 | 0.4693 | <a href="#">P01024</a> |
| <a href="#">CO3_HUMAN</a> | R.SNLDEIIAENIVSR.S      | 3 | 5.5038 | 0.5868 | <a href="#">P01024</a> |

38

Apolipoprotein A-I precursor (Apo-AI) (ApoA-I) [Contains: Apolipoprotein A-I(1-242)] - F

|                             |                         |   |        |        |                        |
|-----------------------------|-------------------------|---|--------|--------|------------------------|
| <a href="#">APOA1_HUMAN</a> | K.VSFLSALEEYTKK.L       | 1 | 3.1183 | 0.4384 | <a href="#">P02647</a> |
| <a href="#">APOA1_HUMAN</a> | R.AELQEGAR.Q            | 1 | 2.4038 | 0.1764 | <a href="#">P02647</a> |
| <a href="#">APOA1_HUMAN</a> | R.AHVDALRTHLAPYSDELRRQ  | 1 | 4.5136 | 0.5032 | <a href="#">P02647</a> |
| <a href="#">APOA1_HUMAN</a> | R.DYVSQFEGSALGK.Q       | 2 | 4.4857 | 0.6616 | <a href="#">P02647</a> |
| <a href="#">APOA1_HUMAN</a> | R.EQLGPVTQEFWDNLEK.E    | 2 | 3.9443 | 0.5417 | <a href="#">P02647</a> |
| <a href="#">APOA1_HUMAN</a> | R.LAARLEALKENGGAR.L     | 1 | 3.8259 | 0.3314 | <a href="#">P02647</a> |
| <a href="#">APOA1_HUMAN</a> | R.VKDLATVYVDVLK.D       | 3 | 4.0019 | 0.4235 | <a href="#">P02647</a> |
| <a href="#">APOA1_HUMAN</a> | K.VSFLSALEEYTK.K        | 2 | 4.3547 | 0.6234 | <a href="#">P02647</a> |
| <a href="#">APOA1_HUMAN</a> | R.THLAPYSDELRRQ.L       | 1 | 3.6811 | 0.4258 | <a href="#">P02647</a> |
| <a href="#">APOA1_HUMAN</a> | K.DLATVYVDVLK.D         | 2 | 3.2638 | 0.4581 | <a href="#">P02647</a> |
| <a href="#">APOA1_HUMAN</a> | K.ATEHLSTLSEK.A         | 2 | 3.7751 | 0.4809 | <a href="#">P02647</a> |
| <a href="#">APOA1_HUMAN</a> | K.DLATVYVDVLKDSGRDYVSQI | 1 | 4.6121 | 0.5144 | <a href="#">P02647</a> |
| <a href="#">APOA1_HUMAN</a> | K.DSGRDYVSQFEGSALGK.Q   | 3 | 5.2861 | 0.5919 | <a href="#">P02647</a> |
| <a href="#">APOA1_HUMAN</a> | K.VQPYLDDFQKKWQEEM*ELY  | 2 | 3.3599 | 0.6735 | <a href="#">P02647</a> |
| <a href="#">APOA1_HUMAN</a> | K.KWQEEM*ELYR.Q         | 2 | 3.2763 | 0.4351 | <a href="#">P02647</a> |
| <a href="#">APOA1_HUMAN</a> | K.LREQLGPVTQEFWDNLEK.E  | 2 | 5.3065 | 0.6059 | <a href="#">P02647</a> |
| <a href="#">APOA1_HUMAN</a> | K.QLNLKLLDNWDSVTSTFSK.L | 1 | 3.9994 | 0.6633 | <a href="#">P02647</a> |
| <a href="#">APOA1_HUMAN</a> | K.VEPLRAELQEGAR.Q       | 2 | 2.7029 | 0.2483 | <a href="#">P02647</a> |
| <a href="#">APOA1_HUMAN</a> | K.VQPYLDDFQKK.W         | 1 | 2.4652 | 0.1965 | <a href="#">P02647</a> |
| <a href="#">APOA1_HUMAN</a> | K.LLDNWDSVTSTFSK.L      | 6 | 4.3298 | 0.6109 | <a href="#">P02647</a> |

18

Apolipoprotein B-100 precursor (Apo B-100) [Contains: Apolipoprotein B-48 (Apo B-48)]

|                            |                     |   |        |        |                        |
|----------------------------|---------------------|---|--------|--------|------------------------|
| <a href="#">APOB_HUMAN</a> | R.TGISPLALIK.G      | 1 | 2.457  | 0.3216 | <a href="#">P04114</a> |
| <a href="#">APOB_HUMAN</a> | K.LLSGGNTLHLVSTTK.T | 1 | 2.5825 | 0.4951 | <a href="#">P04114</a> |
| <a href="#">APOB_HUMAN</a> | K.LTISEQNIQR.A      | 1 | 3.1386 | 0.3844 | <a href="#">P04114</a> |
| <a href="#">APOB_HUMAN</a> | K.M*TSNFPVDLSDYPK.S | 1 | 4.0575 | 0.4488 | <a href="#">P04114</a> |

|                            |                            |   |        |        |  |                        |
|----------------------------|----------------------------|---|--------|--------|--|------------------------|
| <a href="#">APOB_HUMAN</a> | K.SVSDGIAALDLNAVANK.I      | 2 | 4.7745 | 0.4534 |  | <a href="#">P04114</a> |
| <a href="#">APOB_HUMAN</a> | R.ALVDTLKFVTQAEGAK.Q       | 1 | 4.2753 | 0.5563 |  | <a href="#">P04114</a> |
| <a href="#">APOB_HUMAN</a> | R.VNDESTEGKTSYR.L          | 1 | 3.3399 | 0.5718 |  | <a href="#">P04114</a> |
| <a href="#">APOB_HUMAN</a> | R.NLQNNAEWVYQGAIR.Q        | 1 | 3.707  | 0.505  |  | <a href="#">P04114</a> |
| <a href="#">APOB_HUMAN</a> | K.LIVAM*SSWLQK.A           | 1 | 3.0196 | 0.364  |  | <a href="#">P04114</a> |
| <a href="#">APOB_HUMAN</a> | R.ITENDIQIALDDAK.I         | 1 | 3.2275 | 0.3468 |  | <a href="#">P04114</a> |
| <a href="#">APOB_HUMAN</a> | R.IGQDGISSATTNLK.C         | 1 | 3.4779 | 0.5022 |  | <a href="#">P04114</a> |
| <a href="#">APOB_HUMAN</a> | K.FSVPAGIVIPSFQALTAR.F     | 1 | 3.9445 | 0.4292 |  | <a href="#">P04114</a> |
| <a href="#">APOB_HUMAN</a> | K.AVSM*PSFSILGSDVR.V       | 1 | 4.398  | 0.5742 |  | <a href="#">P04114</a> |
| <a href="#">APOB_HUMAN</a> | K.ALVEQGFTVPEIK.T          | 1 | 3.5082 | 0.5635 |  | <a href="#">P04114</a> |
| <a href="#">APOB_HUMAN</a> | R.VPSYTLILPSLELPLVHVPVPR.N | 1 | 5.7891 | 0.6071 |  | <a href="#">P04114</a> |
| <a href="#">APOB_HUMAN</a> | R.SEYQADYESLR.F            | 1 | 3.17   | 0.6075 |  | <a href="#">P04114</a> |
| <a href="#">APOB_HUMAN</a> | K.IEGLNLFDPNNYLPK.E        | 1 | 3.4298 | 0.5119 |  | <a href="#">P04114</a> |

17

Serum albumin precursor - Homo sapiens (Human)

|                            |                         |   |        |        |   |                        |
|----------------------------|-------------------------|---|--------|--------|---|------------------------|
| <a href="#">ALBU_HUMAN</a> | K.VFDEFKPLVEEPQNLK.Q    | 1 | 4.9386 | 0.4405 | 2 | <a href="#">P02768</a> |
| <a href="#">ALBU_HUMAN</a> | K.KVPQVSTPTLVEVSR.N     | 2 | 3.6357 | 0.5665 | 2 | <a href="#">P02768</a> |
| <a href="#">ALBU_HUMAN</a> | K.EQLKAVMDDFAAFVEK.C    | 1 | 3.9159 | 0.4812 | 2 | <a href="#">P02768</a> |
| <a href="#">ALBU_HUMAN</a> | K.ATKEQLKAVMDDFAAFVEK.C | 1 | 4.752  | 0.5466 | 2 | <a href="#">P02768</a> |
| <a href="#">ALBU_HUMAN</a> | K.AEFAEVSKLVTDLTK.V     | 2 | 3.8622 | 0.474  | 1 | <a href="#">P02768</a> |
| <a href="#">ALBU_HUMAN</a> | K.YLYEIAR.R             | 1 | 2.4492 | 0.2762 | 1 | <a href="#">P02768</a> |
| <a href="#">ALBU_HUMAN</a> | K.YICENQDSISSK.L        | 1 | 4.5453 | 0.5127 | 1 | <a href="#">P02768</a> |
| <a href="#">ALBU_HUMAN</a> | K.VPQVSTPTLVEVSR.N      | 1 | 3.4104 | 0.3995 | 2 | <a href="#">P02768</a> |
| <a href="#">ALBU_HUMAN</a> | R.YTKKVPQVSTPTLVEVSR.N  | 1 | 4.0806 | 0.5159 | 2 | <a href="#">P02768</a> |
| <a href="#">ALBU_HUMAN</a> | R.RHPYFYAPPELLFFAKR.Y   | 1 | 3.9906 | 0.4702 | 1 | <a href="#">P02768</a> |
| <a href="#">ALBU_HUMAN</a> | R.HPYFYAPPELLFFAKR.R    | 1 | 4.1486 | 0.4288 | 1 | <a href="#">P02768</a> |
| <a href="#">ALBU_HUMAN</a> | K.LDELRLDEGKASSAK.Q     | 1 | 3.2119 | 0.1527 | 1 | <a href="#">P02768</a> |
| <a href="#">ALBU_HUMAN</a> | R.RHPDYSVVLLLR.L        | 3 | 4.1724 | 0.4272 | 1 | <a href="#">P02768</a> |

15

Ig mu heavy chain disease protein (BOT) - Homo sapiens (Human)

|                            |                          |   |        |        |   |                        |
|----------------------------|--------------------------|---|--------|--------|---|------------------------|
| <a href="#">MUCB_HUMAN</a> | R.GQPLSPEKYVTSAPM*PEPQ/1 | 1 | 3.5311 | 0.3627 | 5 | <a href="#">P04220</a> |
| <a href="#">MUCB_HUMAN</a> | R.FTCTVHTDLPSPLK.Q       | 1 | 3.3488 | 0.309  | 5 | <a href="#">P04220</a> |
| <a href="#">MUCB_HUMAN</a> | K.QVSGVTTDEVEAEAK.E      | 1 | 4.0349 | 0.5004 |   | <a href="#">P04220</a> |
| <a href="#">MUCB_HUMAN</a> | K.VSVFVPPRDGFFGNPR.K     | 1 | 3.3851 | 0.3571 | 5 | <a href="#">P04220</a> |
| <a href="#">MUCB_HUMAN</a> | K.YVTSAPMPEPQAPGR.Y      | 1 | 3.7569 | 0.602  | 5 | <a href="#">P04220</a> |
| <a href="#">MUCB_HUMAN</a> | K.YVTSAPM*PEPQAPGR.Y     | 1 | 3.6615 | 0.5322 | 5 | <a href="#">P04220</a> |
| <a href="#">MUCB_HUMAN</a> | K.SKLICQATGFSPR.Q        | 1 | 4.2717 | 0.5342 | 5 | <a href="#">P04220</a> |
| <a href="#">MUCB_HUMAN</a> | R.GQPLSPEKYVTSAPMPEPQA   | 2 | 4.3777 | 0.7014 | 5 | <a href="#">P04220</a> |
| <a href="#">MUCB_HUMAN</a> | K.VSVFVPPR.D             | 1 | 2.5872 | 0.4801 | 5 | <a href="#">P04220</a> |
| <a href="#">MUCB_HUMAN</a> | R.VFAIPPSFASIFLTK.S      | 2 | 3.1096 | 0.5035 | 5 | <a href="#">P04220</a> |
| <a href="#">MUCB_HUMAN</a> | K.GVALHRPDVYLLPPAR.E     | 2 | 3.9674 | 0.5169 | 5 | <a href="#">P04220</a> |
| <a href="#">MUCB_HUMAN</a> | R.EGKQVGSVTTDEVEAEAK.F   | 1 | 4.1688 | 0.4546 |   | <a href="#">P04220</a> |

13

Clusterin precursor (Complement-associated protein SP-40,40) (Complement cytolysis

|                            |                     |   |        |        |   |                        |
|----------------------------|---------------------|---|--------|--------|---|------------------------|
| <a href="#">CLUS_HUMAN</a> | R.ELDESLQVAER.L     | 1 | 2.8979 | 0.448  | 1 | <a href="#">P10909</a> |
| <a href="#">CLUS_HUMAN</a> | K.FMETVAEK.A        | 1 | 2.1179 | 0.3197 | 1 | <a href="#">P10909</a> |
| <a href="#">CLUS_HUMAN</a> | K.LFSDPITVTVPEVSR.K | 2 | 5.0899 | 0.5805 | 1 | <a href="#">P10909</a> |
| <a href="#">CLUS_HUMAN</a> | K.TLIEKTNEER.K      | 2 | 2.843  | 0.297  | 1 | <a href="#">P10909</a> |
| <a href="#">CLUS_HUMAN</a> | K.TLLSNLEEAK.K      | 1 | 2.5787 | 0.4135 | 1 | <a href="#">P10909</a> |
| <a href="#">CLUS_HUMAN</a> | R.ASSIIDELFQDR.F    | 1 | 3.5899 | 0.5459 | 1 | <a href="#">P10909</a> |
| <a href="#">CLUS_HUMAN</a> | R.KTLLSNLEEAK.K     | 1 | 3.3317 | 0.2658 | 1 | <a href="#">P10909</a> |

|                            |                        |   |        |        |   |                        |
|----------------------------|------------------------|---|--------|--------|---|------------------------|
| <a href="#">CLUS_HUMAN</a> | R.VTTVASHTSDSDVPSGVTEV | 1 | 4.6901 | 0.5539 |   | <a href="#">P10909</a> |
| <a href="#">CLUS_HUMAN</a> | K.FMETVAEKALQEYR.K     | 2 | 4.1294 | 0.6003 | 1 | <a href="#">P10909</a> |
| <a href="#">CLUS_HUMAN</a> | K.TLLSNLEEAKK.K        | 1 | 2.5176 | 0.2833 | 1 | <a href="#">P10909</a> |

12

Ig alpha-2 chain C region - Homo sapiens (Human)

|                             |                         |   |        |        |    |                        |
|-----------------------------|-------------------------|---|--------|--------|----|------------------------|
| <a href="#">IGHA2_HUMAN</a> | R.GFSPKDLVLR.W          | 1 | 2.7016 | 0.3494 | 23 | <a href="#">P01877</a> |
| <a href="#">IGHA2_HUMAN</a> | R.WLQGSQELPREK.Y        | 3 | 3.3133 | 0.3932 | 23 | <a href="#">P01877</a> |
| <a href="#">IGHA2_HUMAN</a> | R.WLQGSQELPR.E          | 1 | 2.6642 | 0.3089 | 23 | <a href="#">P01877</a> |
| <a href="#">IGHA2_HUMAN</a> | R.QEPSQGTTFFAVTSILR.V   | 2 | 4.4006 | 0.6047 | 21 | <a href="#">P01877</a> |
| <a href="#">IGHA2_HUMAN</a> | R.EKYLTWASRQEPSQGTTFFA  | 1 | 4.5972 | 0.5535 | 21 | <a href="#">P01877</a> |
| <a href="#">IGHA2_HUMAN</a> | R.DASGATFTWTPSSGK.S     | 1 | 2.8191 | 0.4866 | 10 | <a href="#">P01877</a> |
| <a href="#">IGHA2_HUMAN</a> | K.YLTWASRQEPSQGTTFFAVT: | 1 | 4.3049 | 0.5664 | 21 | <a href="#">P01877</a> |
| <a href="#">IGHA2_HUMAN</a> | K.SAVQGPPER.D           | 1 | 2.5202 | 0.4097 | 18 | <a href="#">P01877</a> |
| <a href="#">IGHA2_HUMAN</a> | K.KGDTFCMVGHEALPLAFTQI  | 1 | 3.428  | 0.2605 | 19 | <a href="#">P01877</a> |

11

Complement component C9 precursor [Contains: Complement component C9a; Compl

|                           |                         |   |        |        |  |                        |
|---------------------------|-------------------------|---|--------|--------|--|------------------------|
| <a href="#">CO9_HUMAN</a> | R.AIEDYINEFSVR.K        | 1 | 3.9962 | 0.5562 |  | <a href="#">P02748</a> |
| <a href="#">CO9_HUMAN</a> | R.DRDGNTLTYR.R          | 1 | 3.0928 | 0.3691 |  | <a href="#">P02748</a> |
| <a href="#">CO9_HUMAN</a> | R.RPWNVASLIYETKGEK.N    | 2 | 4.7545 | 0.4625 |  | <a href="#">P02748</a> |
| <a href="#">CO9_HUMAN</a> | R.TEHYEEQIEAFK.S        | 1 | 3.2369 | 0.5499 |  | <a href="#">P02748</a> |
| <a href="#">CO9_HUMAN</a> | R.TEHYEEQIEAFKSIIQEK.T  | 1 | 4.6678 | 0.3905 |  | <a href="#">P02748</a> |
| <a href="#">CO9_HUMAN</a> | K.TSNFNAAISLK.F         | 1 | 3.1394 | 0.5546 |  | <a href="#">P02748</a> |
| <a href="#">CO9_HUMAN</a> | K.LSPIYNLVPVK.M         | 2 | 3.4207 | 0.4793 |  | <a href="#">P02748</a> |
| <a href="#">CO9_HUMAN</a> | K.LLRGTVIDVDFVNWASSIND: | 1 | 5.821  | 0.5178 |  | <a href="#">P02748</a> |
| <a href="#">CO9_HUMAN</a> | R.RPWNVASLIYETK.G       | 1 | 3.9729 | 0.4318 |  | <a href="#">P02748</a> |

Inter-alpha-trypsin inhibitor heavy chain H4 precursor (ITI heavy chain H4) (Inter-alpha-

|                             |                         |   |        |        |   |                        |
|-----------------------------|-------------------------|---|--------|--------|---|------------------------|
| <a href="#">ITIH4_HUMAN</a> | R.ANTVQEATFQMELPK.K     | 1 | 4.6503 | 0.569  | 1 | <a href="#">Q14624</a> |
| <a href="#">ITIH4_HUMAN</a> | R.FKPTLSQQQK.S          | 1 | 2.5183 | 0.3032 | 1 | <a href="#">Q14624</a> |
| <a href="#">ITIH4_HUMAN</a> | K.EKAEAAQYSAAVAK.G      | 1 | 2.8786 | 0.5068 | 1 | <a href="#">Q14624</a> |
| <a href="#">ITIH4_HUMAN</a> | R.VVNRANTVQEATFQMELPK.K | 1 | 4.8987 | 0.5652 | 1 | <a href="#">Q14624</a> |
| <a href="#">ITIH4_HUMAN</a> | K.SPEQQETVLDGNLIIR.Y    | 2 | 4.5809 | 0.5234 | 1 | <a href="#">Q14624</a> |
| <a href="#">ITIH4_HUMAN</a> | K.NVVFVIDKSGSM*SGR.K    | 1 | 3.2488 | 0.4923 | 1 | <a href="#">Q14624</a> |
| <a href="#">ITIH4_HUMAN</a> | K.GSEMVVAGK.L           | 1 | 2.8148 | 0.4082 | 1 | <a href="#">Q14624</a> |
| <a href="#">ITIH4_HUMAN</a> | R.LGVYELLLK.V           | 1 | 3.3176 | 0.4585 | 1 | <a href="#">Q14624</a> |
| <a href="#">ITIH4_HUMAN</a> | K.NVVFVIDKSGSMSGR.K     | 1 | 3.8487 | 0.5405 | 1 | <a href="#">Q14624</a> |
| <a href="#">ITIH4_HUMAN</a> | K.ILDDLSPR.D            | 1 | 2.6441 | 0.1592 | 1 | <a href="#">Q14624</a> |

10

IGLV2-14 protein - Homo sapiens (Human)

|                              |                         |   |        |        |    |                        |
|------------------------------|-------------------------|---|--------|--------|----|------------------------|
| <a href="#">A0A5C9_HUMAN</a> | K.QSNNKYAASSYLSLTPEQWK  | 1 | 2.7104 | 0.494  | 29 | <a href="#">A0A5C9</a> |
| <a href="#">A0A5C9_HUMAN</a> | K.ADSSPVKAGVETTTPSKQSN  | 1 | 4.7316 | 0.4236 | 17 | <a href="#">A0A5C9</a> |
| <a href="#">A0A5C9_HUMAN</a> | K.AGVETTTPSKQSNK.Y      | 1 | 3.5849 | 0.4585 | 17 | <a href="#">A0A5C9</a> |
| <a href="#">A0A5C9_HUMAN</a> | K.YAASSYLSLTPEQWK.S     | 1 | 4.5    | 0.6039 | 29 | <a href="#">A0A5C9</a> |
| <a href="#">A0A5C9_HUMAN</a> | K.ADSSPVKAGVETTTPSK.Q   | 2 | 3.3869 | 0.5092 | 17 | <a href="#">A0A5C9</a> |
| <a href="#">A0A5C9_HUMAN</a> | R.SYSCQVTHEGSTVEK.T     | 1 | 3.7037 | 0.5175 | 28 | <a href="#">A0A5C9</a> |
| <a href="#">A0A5C9_HUMAN</a> | K.AGVETTTPSK.Q          | 1 | 3.3397 | 0.3695 | 17 | <a href="#">A0A5C9</a> |
| <a href="#">A0A5C9_HUMAN</a> | K.AAPSVTLFPPSSEELQANK.A | 2 | 3.9877 | 0.5214 | 18 | <a href="#">A0A5C9</a> |

9

Haptoglobin-related protein precursor - Homo sapiens (Human)

|                            |                         |   |        |        |  |                        |
|----------------------------|-------------------------|---|--------|--------|--|------------------------|
| <a href="#">HPTR_HUMAN</a> | K.QLVEIEKVVLPNYHQVDIGLI | 1 | 3.8899 | 0.4594 |  | <a href="#">P00739</a> |
| <a href="#">HPTR_HUMAN</a> | R.VGYVSGWGQSDNFKLTDHLF  | 1 | 3.4728 | 0.4822 |  | <a href="#">P00739</a> |
| <a href="#">HPTR_HUMAN</a> | R.VGYVSGWGQSDNFK.L      | 1 | 4.3648 | 0.6056 |  | <a href="#">P00739</a> |

|                            |                         |   |        |        |   |                        |
|----------------------------|-------------------------|---|--------|--------|---|------------------------|
| <a href="#">HPTR_HUMAN</a> | R.TEGDGVYTLNDK.K        | 1 | 2.7191 | 0.4119 | 2 | <a href="#">P00739</a> |
| <a href="#">HPTR_HUMAN</a> | R.ILGGHLDAK.G           | 1 | 2.731  | 0.2804 | 3 | <a href="#">P00739</a> |
| <a href="#">HPTR_HUMAN</a> | K.YVMLPVADQYDCITHYEGSTC | 1 | 3.2017 | 0.3918 |   | <a href="#">P00739</a> |
| <a href="#">HPTR_HUMAN</a> | K.VTSIQDWVQKTIAEN.-     | 1 | 2.8735 | 0.3053 | 3 | <a href="#">P00739</a> |
| <a href="#">HPTR_HUMAN</a> | K.SPVGVQPILNEHTFCVGMASK | 1 | 3.8356 | 0.4283 |   | <a href="#">P00739</a> |
| <a href="#">HPTR_HUMAN</a> | K.VTSIQDWVQK.T          | 1 | 3.0847 | 0.4541 | 3 | <a href="#">P00739</a> |

Kininogen-1 precursor (Alpha-2-thiol proteinase inhibitor) [Contains: Kininogen-1 heavy

|                            |                        |   |        |        |   |                        |
|----------------------------|------------------------|---|--------|--------|---|------------------------|
| <a href="#">KNG1_HUMAN</a> | R.DIPTNSPELEETLHTITK.L | 1 | 4.3517 | 0.6488 | 1 | <a href="#">P01042</a> |
| <a href="#">KNG1_HUMAN</a> | R.ITEATKTVGSDFYFSK.Y   | 1 | 3.3091 | 0.3804 |   | <a href="#">P01042</a> |
| <a href="#">KNG1_HUMAN</a> | K.KYFIDFVAR.E          | 1 | 3.1867 | 0.4748 | 1 | <a href="#">P01042</a> |
| <a href="#">KNG1_HUMAN</a> | K.AATGECTATVGKR.S      | 1 | 2.733  | 0.5113 |   | <a href="#">P01042</a> |
| <a href="#">KNG1_HUMAN</a> | K.KYNSQNSNNQFVLYR.I    | 2 | 5.0919 | 0.4841 |   | <a href="#">P01042</a> |
| <a href="#">KNG1_HUMAN</a> | K.TVGSDFYFSK.Y         | 1 | 2.9558 | 0.4534 |   | <a href="#">P01042</a> |
| <a href="#">KNG1_HUMAN</a> | K.YNSQNSNNQFVLYR.I     | 1 | 3.0483 | 0.3148 |   | <a href="#">P01042</a> |
| <a href="#">KNG1_HUMAN</a> | K.AATGECTATVGK.R       | 1 | 2.6874 | 0.4648 |   | <a href="#">P01042</a> |

Transthyretin precursor (Prealbumin) (TBPA) (TTR) (ATTR) - Homo sapiens (Human)

|                            |                          |   |        |        |  |                        |
|----------------------------|--------------------------|---|--------|--------|--|------------------------|
| <a href="#">TTHY_HUMAN</a> | R.YTIAALLSPYSYSTTAVVTNPF | 1 | 3.5895 | 0.5996 |  | <a href="#">P02766</a> |
| <a href="#">TTHY_HUMAN</a> | R.RYTIAALLSPYSYSTTAVVTNF | 1 | 4.3222 | 0.5579 |  | <a href="#">P02766</a> |
| <a href="#">TTHY_HUMAN</a> | R.KAADDTWEPFASGK.T       | 2 | 4.7011 | 0.6127 |  | <a href="#">P02766</a> |
| <a href="#">TTHY_HUMAN</a> | R.GSPAINVAVHVFR.K        | 1 | 3.923  | 0.4536 |  | <a href="#">P02766</a> |
| <a href="#">TTHY_HUMAN</a> | K.VLDAVRGSPAINVAVHVFR.K  | 1 | 3.1378 | 0.3863 |  | <a href="#">P02766</a> |
| <a href="#">TTHY_HUMAN</a> | K.TSESELHGLTTEEEFVEGIYI  | 1 | 4.001  | 0.4704 |  | <a href="#">P02766</a> |
| <a href="#">TTHY_HUMAN</a> | K.AADDTWEPFASGK.T        | 1 | 4.1696 | 0.6489 |  | <a href="#">P02766</a> |
| <a href="#">TTHY_HUMAN</a> | K.TSESELHGLTTEEEFVEGIYI  | 1 | 5.397  | 0.5343 |  | <a href="#">P02766</a> |

8

Apolipoprotein A-II precursor (ApoA-II) (ApoA-II) [Contains: Apolipoprotein A-II(1-76)] -

|                             |                         |   |        |        |  |                        |
|-----------------------------|-------------------------|---|--------|--------|--|------------------------|
| <a href="#">APOA2_HUMAN</a> | K.SKEQLTPLIK.K          | 1 | 2.8448 | 0.2979 |  | <a href="#">P02652</a> |
| <a href="#">APOA2_HUMAN</a> | K.AGTELVNFLSYFVELGTQPAT | 1 | 3.5458 | 0.492  |  | <a href="#">P02652</a> |
| <a href="#">APOA2_HUMAN</a> | K.KAGTELVNFLSYFVELGTQPA | 2 | 4.275  | 0.554  |  | <a href="#">P02652</a> |
| <a href="#">APOA2_HUMAN</a> | K.SKEQLTPLIKK.A         | 1 | 3.3715 | 0.4314 |  | <a href="#">P02652</a> |
| <a href="#">APOA2_HUMAN</a> | K.SPELQAEAK.S           | 2 | 2.7384 | 0.3556 |  | <a href="#">P02652</a> |
| <a href="#">APOA2_HUMAN</a> | K.VKSPELQAEAKSYFEK.S    | 1 | 3.6005 | 0.5889 |  | <a href="#">P02652</a> |

Complement C4-A precursor (Acidic complement C4) [Contains: Complement C4 beta

|                            |                         |   |        |        |   |                        |
|----------------------------|-------------------------|---|--------|--------|---|------------------------|
| <a href="#">CO4A_HUMAN</a> | R.DSSTWLTAFVLK.V        | 1 | 2.7378 | 0.4208 | 2 | <a href="#">P0C0L4</a> |
| <a href="#">CO4A_HUMAN</a> | R.GLQDEDGYR.M           | 1 | 2.5422 | 0.3907 | 3 | <a href="#">P0C0L4</a> |
| <a href="#">CO4A_HUMAN</a> | R.STQDVTIALDALSAYWIASHT | 1 | 4.4498 | 0.4475 | 3 | <a href="#">P0C0L4</a> |
| <a href="#">CO4A_HUMAN</a> | R.TLEIPGNSDPNMIPDGFNSY  | 1 | 2.5262 | 0.5223 | 3 | <a href="#">P0C0L4</a> |
| <a href="#">CO4A_HUMAN</a> | R.VTASDPLDTLSEGLSPGG\   | 1 | 3.3517 | 0.3474 | 3 | <a href="#">P0C0L4</a> |
| <a href="#">CO4A_HUMAN</a> | K.VLSLAQEQVGGSPK.L      | 1 | 4.1215 | 0.5488 | 3 | <a href="#">P0C0L4</a> |
| <a href="#">CO4A_HUMAN</a> | K.DHAVDLIQGYMR.I        | 1 | 3.3116 | 0.4813 | 3 | <a href="#">P0C0L4</a> |
| <a href="#">CO4A_HUMAN</a> | K.DHAVDLIQK.G           | 1 | 2.683  | 0.4144 | 3 | <a href="#">P0C0L4</a> |

Fibronectin precursor (FN) (Cold-insoluble globulin) (CIG) - Homo sapiens (Human)

|                            |                        |   |        |        |   |                        |
|----------------------------|------------------------|---|--------|--------|---|------------------------|
| <a href="#">FINC_HUMAN</a> | K.WLPSSSPVTGYR.V       | 1 | 2.4251 | 0.3914 | 1 | <a href="#">P02751</a> |
| <a href="#">FINC_HUMAN</a> | R.WSRPQAPITGYR.I       | 1 | 3.4503 | 0.2879 | 1 | <a href="#">P02751</a> |
| <a href="#">FINC_HUMAN</a> | R.VTWAPPPSIDLTNFLVR.Y  | 1 | 2.6481 | 0.3702 | 1 | <a href="#">P02751</a> |
| <a href="#">FINC_HUMAN</a> | R.SYTITGLQPGTDYK.I     | 1 | 3.6172 | 0.5387 | 1 | <a href="#">P02751</a> |
| <a href="#">FINC_HUMAN</a> | R.NTFAEVTGLSPGVTYFFK.V | 1 | 5.3946 | 0.6546 | 1 | <a href="#">P02751</a> |
| <a href="#">FINC_HUMAN</a> | K.LGVRPSQGGAPR.E       | 1 | 3.5762 | 0.4593 | 1 | <a href="#">P02751</a> |
| <a href="#">FINC_HUMAN</a> | K.IYLYTLNDNAR.S        | 1 | 2.9985 | 0.4347 | 1 | <a href="#">P02751</a> |
| <a href="#">FINC_HUMAN</a> | R.RPGGEPSPGTTGQSYNQY   | 1 | 5.6805 | 0.5459 |   | <a href="#">P02751</a> |

7

Hypothetical protein - Homo sapiens (Human)

|                              |                         |   |        |        |    |                        |
|------------------------------|-------------------------|---|--------|--------|----|------------------------|
| <a href="#">A0A5E5_HUMAN</a> | K.VQWKVDNALQSGNSQESVTE  | 1 | 5.3758 | 0.5969 | 20 | <a href="#">A0A5E5</a> |
| <a href="#">A0A5E5_HUMAN</a> | R.TVAAPSVFIFPPSDEQLK.S  | 1 | 4.0113 | 0.6022 | 21 | <a href="#">A0A5E5</a> |
| <a href="#">A0A5E5_HUMAN</a> | K.VDNALQSGNSQESVTEQDSK  | 3 | 5.5862 | 0.6307 | 20 | <a href="#">A0A5E5</a> |
| <a href="#">A0A5E5_HUMAN</a> | K.HKVYACEVTHQGLSSPVTK.S | 1 | 3.52   | 0.5303 | 21 | <a href="#">A0A5E5</a> |
| <a href="#">A0A5E5_HUMAN</a> | K.VDNALQSGNSQESVTEQDSK  | 1 | 5.2253 | 0.6447 | 20 | <a href="#">A0A5E5</a> |

IGHM protein - Homo sapiens (Human)

|                              |                       |   |        |        |   |                        |
|------------------------------|-----------------------|---|--------|--------|---|------------------------|
| <a href="#">Q6GMY2_HUMAN</a> | K.YAATSQVLLPSK.D      | 1 | 3.1227 | 0.3667 | 3 | <a href="#">Q6GMY2</a> |
| <a href="#">Q6GMY2_HUMAN</a> | K.QVGSVTTDQVQAEAKESGF | 1 | 3.9437 | 0.1085 | 4 | <a href="#">Q6GMY2</a> |
| <a href="#">Q6GMY2_HUMAN</a> | K.QVGSVTTDQVQAEAK.E   | 2 | 4.5632 | 0.5367 | 4 | <a href="#">Q6GMY2</a> |
| <a href="#">Q6GMY2_HUMAN</a> | K.NVPLPVIAELPPK.V     | 1 | 2.4138 | 0.5893 | 4 | <a href="#">Q6GMY2</a> |
| <a href="#">Q6GMY2_HUMAN</a> | R.EGKQVGSVTTDQVQAEAK. | 2 | 4.8742 | 0.4518 | 4 | <a href="#">Q6GMY2</a> |

Inter-alpha-trypsin inhibitor heavy chain H1 precursor (ITI heavy chain H1) (Inter-alpha-

|                            |                         |   |        |        |   |                        |
|----------------------------|-------------------------|---|--------|--------|---|------------------------|
| <a href="#">ITI1_HUMAN</a> | R.VQSWKGSLSVQASEANLQAAC | 1 | 4.5809 | 0.5685 |   | <a href="#">P19827</a> |
| <a href="#">ITI1_HUMAN</a> | K.LDAQASF.LPK.E         | 1 | 3.0334 | 0.333  |   | <a href="#">P19827</a> |
| <a href="#">ITI1_HUMAN</a> | K.AAISGENAGLVR.A        | 1 | 3.7583 | 0.4753 |   | <a href="#">P19827</a> |
| <a href="#">ITI1_HUMAN</a> | K.QYYEGSEIVVAGR.I       | 2 | 3.663  | 0.3879 | 1 | <a href="#">P19827</a> |
| <a href="#">ITI1_HUMAN</a> | R.GFSLDEATNLNGLLR.G     | 1 | 3.0512 | 0.1493 |   | <a href="#">P19827</a> |
| <a href="#">ITI1_HUMAN</a> | R.KAAISGENAGLVR.A       | 1 | 3.6166 | 0.4187 |   | <a href="#">P19827</a> |

6

Alpha-1-antitrypsin precursor (Alpha-1 protease inhibitor) (Alpha-1-antiproteinase) - Ho

|                            |                         |   |        |        |   |                        |
|----------------------------|-------------------------|---|--------|--------|---|------------------------|
| <a href="#">A1AT_HUMAN</a> | K.VFSNGADLSGVTEEAPLKLSK | 1 | 3.4378 | 0.2754 | 1 | <a href="#">P01009</a> |
| <a href="#">A1AT_HUMAN</a> | K.SVLGQLGITK.V          | 2 | 3.2497 | 0.4665 | 1 | <a href="#">P01009</a> |
| <a href="#">A1AT_HUMAN</a> | K.LSITGTYDLK.S          | 1 | 2.9039 | 0.3452 | 1 | <a href="#">P01009</a> |
| <a href="#">A1AT_HUMAN</a> | K.KLSSWVLLMK.Y          | 1 | 3.0234 | 0.3783 |   | <a href="#">P01009</a> |
| <a href="#">A1AT_HUMAN</a> | K.ITPNLAEFAFSLYR.Q      | 1 | 2.6544 | 0.4234 |   | <a href="#">P01009</a> |

Alpha-2-HS-glycoprotein precursor (Fetuin-A) (Alpha-2-Z-globulin) (Ba-alpha-2-glycopro

|                             |                         |   |        |        |  |                        |
|-----------------------------|-------------------------|---|--------|--------|--|------------------------|
| <a href="#">FETUA_HUMAN</a> | R.HTFM*GVVSLGSPSGEVSHPI | 1 | 4.0314 | 0.5471 |  | <a href="#">P02765</a> |
| <a href="#">FETUA_HUMAN</a> | R.HTFMGVVSLGSPSGEVSHPR  | 1 | 4.3221 | 0.5783 |  | <a href="#">P02765</a> |
| <a href="#">FETUA_HUMAN</a> | K.LDGKFSVVYAK.C         | 1 | 3.3296 | 0.4844 |  | <a href="#">P02765</a> |
| <a href="#">FETUA_HUMAN</a> | K.HTLNQIDEVK.V          | 1 | 3.5552 | 0.5094 |  | <a href="#">P02765</a> |
| <a href="#">FETUA_HUMAN</a> | R.TVVQPSVGAAAGPVVPPCPG  | 2 | 4.2867 | 0.7059 |  | <a href="#">P02765</a> |

IGHA1 protein - Homo sapiens (Human)

|                              |                     |   |        |        |    |                        |
|------------------------------|---------------------|---|--------|--------|----|------------------------|
| <a href="#">Q8N5K4_HUMAN</a> | K.GTTVTVSSASPTSPK.V | 1 | 3.5773 | 0.5901 | 1  | <a href="#">Q8N5K4</a> |
| <a href="#">Q8N5K4_HUMAN</a> | K.TPLTATLSK.S       | 1 | 2.6    | 0.4406 | 11 | <a href="#">Q8N5K4</a> |
| <a href="#">Q8N5K4_HUMAN</a> | K.TFTCTAAYPESK.T    | 2 | 3.0622 | 0.377  | 12 | <a href="#">Q8N5K4</a> |
| <a href="#">Q8N5K4_HUMAN</a> | R.DASGVTFWTTPSSGK.S | 2 | 4.1387 | 0.6122 | 12 | <a href="#">Q8N5K4</a> |

5

Complement C1r subcomponent precursor (EC 3.4.21.41) (Complement component 1,

|                           |                          |   |        |        |  |                        |
|---------------------------|--------------------------|---|--------|--------|--|------------------------|
| <a href="#">C1R_HUMAN</a> | K.TLDEFTIIQNLQPQYQFR.D   | 1 | 3.6375 | 0.6273 |  | <a href="#">P00736</a> |
| <a href="#">C1R_HUMAN</a> | R.HSCQAECSSSELYTEASGYIS  | 1 | 3.6651 | 0.485  |  | <a href="#">P00736</a> |
| <a href="#">C1R_HUMAN</a> | K.VLNYVDWIKKEMEEED.-     | 1 | 4.5723 | 0.4846 |  | <a href="#">P00736</a> |
| <a href="#">C1R_HUMAN</a> | K.QRPPDLDTSSNAVDLLFFFTDE | 1 | 3.2118 | 0.2014 |  | <a href="#">P00736</a> |
| <a href="#">C1R_HUMAN</a> | R.YTTTGMVNTYK.A          | 1 | 2.9805 | 0.4952 |  | <a href="#">P00736</a> |

KNG1 protein - Homo sapiens (Human)

|                              |                   |   |        |        |  |                        |
|------------------------------|-------------------|---|--------|--------|--|------------------------|
| <a href="#">Q05CF8_HUMAN</a> | R.IGEIKEETTSHLR.S | 4 | 4.0135 | 0.4737 |  | <a href="#">Q05CF8</a> |
| <a href="#">Q05CF8_HUMAN</a> | K.AGAEPASEREVS.-  | 1 | 2.5076 | 0.3872 |  | <a href="#">Q05CF8</a> |

4

Apolipoprotein A-IV precursor (Apo-AIV) (ApoA-IV) - Homo sapiens (Human)

|                             |                  |   |        |        |  |                        |
|-----------------------------|------------------|---|--------|--------|--|------------------------|
| <a href="#">APOA4_HUMAN</a> | K.KLVPFATELHER.L | 1 | 3.2616 | 0.2567 |  | <a href="#">P06727</a> |
|-----------------------------|------------------|---|--------|--------|--|------------------------|

|                                                                                                                            |                        |   |        |        |    |                        |
|----------------------------------------------------------------------------------------------------------------------------|------------------------|---|--------|--------|----|------------------------|
| <a href="#">APOA4_HUMAN</a>                                                                                                | K.IDQNVEELKGR.L        | 1 | 3.8271 | 0.3118 | 1  | <a href="#">P06727</a> |
| <a href="#">APOA4_HUMAN</a>                                                                                                | K.LGEVNTYAGDLQK.K      | 1 | 3.3428 | 0.5157 |    | <a href="#">P06727</a> |
| <a href="#">APOA4_HUMAN</a>                                                                                                | K.SELTQQLNALFQDK.L     | 1 | 3.9987 | 0.4331 |    | <a href="#">P06727</a> |
| Apolipoprotein E precursor (Apo-E) - Homo sapiens (Human)                                                                  |                        |   |        |        |    |                        |
| <a href="#">APOE_HUMAN</a>                                                                                                 | R.LGPLVEQGR.V          | 1 | 2.5321 | 0.3513 |    | <a href="#">P02649</a> |
| <a href="#">APOE_HUMAN</a>                                                                                                 | R.LSKELQAAQAR.L        | 1 | 3.5135 | 0.4371 |    | <a href="#">P02649</a> |
| <a href="#">APOE_HUMAN</a>                                                                                                 | R.AATVGSLAGQPLQER.A    | 2 | 4.2196 | 0.5271 |    | <a href="#">P02649</a> |
| Apolipoprotein-L1 precursor (Apolipoprotein L-I) (Apolipoprotein L) (ApoL-I) (Apo-L) (ApoL)                                |                        |   |        |        |    |                        |
| <a href="#">APOL1_HUMAN</a>                                                                                                | R.VTEPISAESGEQVER.V    | 1 | 4.4356 | 0.5909 |    | <a href="#">O14791</a> |
| <a href="#">APOL1_HUMAN</a>                                                                                                | K.ILQADQEL.-           | 1 | 2.4127 | 0.346  |    | <a href="#">O14791</a> |
| <a href="#">APOL1_HUMAN</a>                                                                                                | K.VAQELEEKLNILNNNYK.I  | 2 | 4.2498 | 0.416  |    | <a href="#">O14791</a> |
| Immunoglobulin J chain - Homo sapiens (Human)                                                                              |                        |   |        |        |    |                        |
| <a href="#">IGJ_HUMAN</a>                                                                                                  | R.TRFVYHLSDLCK.K       | 1 | 3.4027 | 0.1156 |    | <a href="#">P01591</a> |
| <a href="#">IGJ_HUMAN</a>                                                                                                  | R.IIRSEDPNEDIVER.N     | 2 | 4.8629 | 0.3044 |    | <a href="#">P01591</a> |
| <a href="#">IGJ_HUMAN</a>                                                                                                  | R.SSEDPNEDIVER.N       | 1 | 2.9104 | 0.2989 |    | <a href="#">P01591</a> |
| Apolipoprotein(a) precursor (EC 3.4.21.-) (Apo(a)) (Lp(a)) - Homo sapiens (Human)                                          |                        |   |        |        |    |                        |
| <a href="#">APOA_HUMAN</a>                                                                                                 | R.TPENYPNAGLTR.N       | 1 | 3.1129 | 0.3994 | 1  | <a href="#">P08519</a> |
| <a href="#">APOA_HUMAN</a>                                                                                                 | R.GTYSTTVTGR.T         | 1 | 3.2904 | 0.5102 | 39 | <a href="#">P08519</a> |
| <a href="#">APOA_HUMAN</a>                                                                                                 | R.GSFSTTVTGR.T         | 1 | 2.8014 | 0.3728 | 4  | <a href="#">P08519</a> |
| C4b-binding protein alpha chain precursor (C4bp) (Proline-rich protein) (PRP) - Homo sapiens (Human)                       |                        |   |        |        |    |                        |
| <a href="#">C4BP_HUMAN</a>                                                                                                 | R.FSAICQGDGTWSPR.T     | 1 | 2.7546 | 0.4094 |    | <a href="#">P04003</a> |
| <a href="#">C4BP_HUMAN</a>                                                                                                 | K.LNNGEITQHR.K         | 1 | 2.4541 | 0.1835 |    | <a href="#">P04003</a> |
| <a href="#">C4BP_HUMAN</a>                                                                                                 | K.LSLEIEQLELQR.D       | 1 | 3.9841 | 0.2668 |    | <a href="#">P04003</a> |
| Carboxypeptidase N catalytic chain precursor (EC 3.4.17.3) (CPN) (Carboxypeptidase N)                                      |                        |   |        |        |    |                        |
| <a href="#">CBPN_HUMAN</a>                                                                                                 | R.IVQLIQDTR.I          | 1 | 3.2179 | 0.3247 |    | <a href="#">P15169</a> |
| <a href="#">CBPN_HUMAN</a>                                                                                                 | K.YVGNMHGNEALGR.E      | 1 | 3.3119 | 0.3647 |    | <a href="#">P15169</a> |
| <a href="#">CBPN_HUMAN</a>                                                                                                 | R.NFPDLNTYIYNEK.Y      | 1 | 4.138  | 0.4766 |    | <a href="#">P15169</a> |
| Carboxypeptidase N subunit 2 precursor (Carboxypeptidase N polypeptide 2) (Carboxypeptidase N2)                            |                        |   |        |        |    |                        |
| <a href="#">CPN2_HUMAN</a>                                                                                                 | K.LSNALSGLPQGVFGK.L    | 2 | 3.4141 | 0.5334 |    | <a href="#">P22792</a> |
| <a href="#">CPN2_HUMAN</a>                                                                                                 | K.AGGSWDLAVQER.A       | 1 | 2.6148 | 0.1893 |    | <a href="#">P22792</a> |
| Fibulin-1 precursor - Homo sapiens (Human)                                                                                 |                        |   |        |        |    |                        |
| <a href="#">FBLN1_HUMAN</a>                                                                                                | R.SAATLQQEKTDTVR.C     | 2 | 4.2136 | 0.5613 |    | <a href="#">P23142</a> |
| <a href="#">FBLN1_HUMAN</a>                                                                                                | R.GYHLNEEGTR.C         | 1 | 2.5434 | 0.3321 |    | <a href="#">P23142</a> |
| Heparin cofactor 2 precursor (Heparin cofactor II) (HC-II) (Protease inhibitor leuserpin 2)                                |                        |   |        |        |    |                        |
| <a href="#">HEP2_HUMAN</a>                                                                                                 | R.LNEREVVKVSMQTK.G     | 1 | 3.7793 | 0.4084 |    | <a href="#">P05546</a> |
| <a href="#">HEP2_HUMAN</a>                                                                                                 | R.LNEREVVK.V           | 1 | 3.0082 | 0.1334 |    | <a href="#">P05546</a> |
| <a href="#">HEP2_HUMAN</a>                                                                                                 | K.TLEAQLTPR.V          | 1 | 2.8729 | 0.3895 |    | <a href="#">P05546</a> |
| Ig lambda chain V-III region LOI - Homo sapiens (Human)                                                                    |                        |   |        |        |    |                        |
| <a href="#">LV302_HUMAN</a>                                                                                                | -.YVLTQPPSVSVAPGETAR.L | 2 | 3.8701 | 0.5159 |    | <a href="#">P80748</a> |
| <a href="#">LV302_HUMAN</a>                                                                                                | R.FSGSNSGNTATLTISR.V   | 1 | 4.5371 | 0.4265 | 4  | <a href="#">P80748</a> |
| IgGf-binding protein precursor (FcgammaBP) (Fcgamma-binding protein antigen) - Homo sapiens (Human)                        |                        |   |        |        |    |                        |
| <a href="#">FCGBP_HUMAN</a>                                                                                                | R.VNGVLTALPVSVADGR.I   | 1 | 2.4859 | 0.5101 | 2  | <a href="#">Q9Y6R7</a> |
| <a href="#">FCGBP_HUMAN</a>                                                                                                | R.GSQAVSYTR.S          | 1 | 2.9468 | 0.3523 | 2  | <a href="#">Q9Y6R7</a> |
| <a href="#">FCGBP_HUMAN</a>                                                                                                | R.GATTSPGVYELSSR.C     | 1 | 3.5498 | 0.6082 |    | <a href="#">Q9Y6R7</a> |
| Inter-alpha-trypsin inhibitor heavy chain H2 precursor (ITI heavy chain H2) (Inter-alpha-trypsin inhibitor heavy chain H2) |                        |   |        |        |    |                        |
| <a href="#">ITIH2_HUMAN</a>                                                                                                | K.FYNQVSTPLLR.N        | 1 | 3.1558 | 0.4017 | 1  | <a href="#">P19823</a> |
| <a href="#">ITIH2_HUMAN</a>                                                                                                | K.IQPSGGTNINEALLR.A    | 1 | 3.0001 | 0.5474 | 1  | <a href="#">P19823</a> |
| <a href="#">ITIH2_HUMAN</a>                                                                                                | R.IYGNQDTSSQLK.K       | 1 | 3.211  | 0.3976 | 1  | <a href="#">P19823</a> |
| Plasma kallikrein precursor (EC 3.4.21.34) (Plasma prekallikrein) (Kininogenin) (Fletcher factor)                          |                        |   |        |        |    |                        |



|                                                                                     |                      |   |        |        |   |                        |
|-------------------------------------------------------------------------------------|----------------------|---|--------|--------|---|------------------------|
| <a href="#">KLKB1_HUMAN</a>                                                         | K.TQSSDGKAMQSPA.-    | 1 | 3.4332 | 0.5063 | 1 | <a href="#">P03952</a> |
| <a href="#">KLKB1_HUMAN</a>                                                         | K.VAEYMDWILEK.T      | 1 | 3.7517 | 0.5278 | 1 | <a href="#">P03952</a> |
| <a href="#">KLKB1_HUMAN</a>                                                         | R.IAYGTQGSSGYSLR.L   | 1 | 3.2432 | 0.5338 | 1 | <a href="#">P03952</a> |
| Serum paraoxonase/arylesterase 1 (EC 3.1.1.2) (EC 3.1.8.1) (PON 1) (Serum aryldialk |                      |   |        |        |   |                        |
| <a href="#">PON1_HUMAN</a>                                                          | K.IFFYDSENPPASEVLR.I | 2 | 5.2769 | 0.5703 |   | <a href="#">P27169</a> |
| <a href="#">PON1_HUMAN</a>                                                          | R.IQNILTEEPK.V       | 1 | 3.2441 | 0.1978 |   | <a href="#">P27169</a> |

2

Alpha-1-antichymotrypsin precursor (ACT) [Contains: Alpha-1-antichymotrypsin His-Pr

|                            |                        |   |        |        |  |                        |
|----------------------------|------------------------|---|--------|--------|--|------------------------|
| <a href="#">AACT_HUMAN</a> | R.NLAVSQVVHK.A         | 1 | 2.8192 | 0.2593 |  | <a href="#">P01011</a> |
| <a href="#">AACT_HUMAN</a> | R.LYGSEAFATDFQDSAAAK.K | 1 | 4.9881 | 0.5788 |  | <a href="#">P01011</a> |

Alpha-2-macroglobulin precursor (Alpha-2-M) - Homo sapiens (Human)

|                            |                      |   |        |        |  |                        |
|----------------------------|----------------------|---|--------|--------|--|------------------------|
| <a href="#">A2MG_HUMAN</a> | K.HYDGSYSTFGER.Y     | 1 | 2.8728 | 0.4901 |  | <a href="#">P01023</a> |
| <a href="#">A2MG_HUMAN</a> | K.QFSFPLSSEPFQGSYK.V | 1 | 3.1793 | 0.4241 |  | <a href="#">P01023</a> |

Apolipoprotein C-III precursor (Apo-CIII) (ApoC-III) - Homo sapiens (Human)

|                             |                      |   |        |        |  |                        |
|-----------------------------|----------------------|---|--------|--------|--|------------------------|
| <a href="#">APOC3_HUMAN</a> | K.DALSSVQESQVAQQAR.G | 2 | 3.9931 | 0.4816 |  | <a href="#">P02656</a> |
|-----------------------------|----------------------|---|--------|--------|--|------------------------|

CD44 antigen precursor (Phagocytic glycoprotein I) (PGP-1) (HUTCH-I) (Extracellular r

|                            |                  |   |        |       |   |                        |
|----------------------------|------------------|---|--------|-------|---|------------------------|
| <a href="#">CD44_HUMAN</a> | R.YGFIEGHVVIPR.I | 2 | 3.3144 | 0.435 | 1 | <a href="#">P16070</a> |
|----------------------------|------------------|---|--------|-------|---|------------------------|

Ceruloplasmin precursor (EC 1.16.3.1) (Ferroxidase) - Homo sapiens (Human)

|                            |                         |   |        |        |  |                        |
|----------------------------|-------------------------|---|--------|--------|--|------------------------|
| <a href="#">CERU_HUMAN</a> | K.GAYPLSIEPIGVR.F       | 1 | 3.4241 | 0.4348 |  | <a href="#">P00450</a> |
| <a href="#">CERU_HUMAN</a> | K.MYYSAVDPTKDIFTGLIGPMK | 1 | 3.2593 | 0.3704 |  | <a href="#">P00450</a> |

Histidine-rich glycoprotein precursor (Histidine-proline-rich glycoprotein) (HPRG) - Hom

|                           |                |   |        |        |  |                        |
|---------------------------|----------------|---|--------|--------|--|------------------------|
| <a href="#">HRG_HUMAN</a> | R.RDGYLFQLLR.I | 1 | 2.6295 | 0.3525 |  | <a href="#">P04196</a> |
| <a href="#">HRG_HUMAN</a> | R.DGYLFQLLR.I  | 1 | 3.3483 | 0.2502 |  | <a href="#">P04196</a> |

Hypothetical protein DKFZp686O01196 - Homo sapiens (Human)

|                              |                  |   |        |        |    |                        |
|------------------------------|------------------|---|--------|--------|----|------------------------|
| <a href="#">Q6N094_HUMAN</a> | K.GPSVFPLAPSSK.S | 1 | 2.8538 | 0.3073 | 20 | <a href="#">Q6N094</a> |
| <a href="#">Q6N094_HUMAN</a> | K.VSNKALPAPIEK.T | 1 | 2.662  | 0.1861 | 24 | <a href="#">Q6N094</a> |

Ig kappa chain V-III region VG precursor (Fragment) - Homo sapiens (Human)

|                             |                        |   |        |        |   |                        |
|-----------------------------|------------------------|---|--------|--------|---|------------------------|
| <a href="#">KV309_HUMAN</a> | R.ASQSVSSYLAWYQQKPGQAI | 1 | 4.4015 | 0.5622 |   | <a href="#">P04433</a> |
| <a href="#">KV309_HUMAN</a> | R.LLIYDASNR.A          | 1 | 2.4233 | 0.2887 | 1 | <a href="#">P04433</a> |

Ig kappa chain V-IV region Len - Homo sapiens (Human)

|                             |                        |   |        |        |  |                        |
|-----------------------------|------------------------|---|--------|--------|--|------------------------|
| <a href="#">KV402_HUMAN</a> | -.DIVMTQSPDSLAVSLGER.A | 2 | 4.9703 | 0.4704 |  | <a href="#">P01625</a> |
|-----------------------------|------------------------|---|--------|--------|--|------------------------|

Kinesin heavy chain isoform 5A (Neuronal kinesin heavy chain) (NKHC) (Kinesin heavy

|                             |               |   |        |        |  |                        |
|-----------------------------|---------------|---|--------|--------|--|------------------------|
| <a href="#">KIF5A_HUMAN</a> | K.LEAELSRWR.N | 2 | 2.5325 | 0.1639 |  | <a href="#">Q12840</a> |
|-----------------------------|---------------|---|--------|--------|--|------------------------|

Latrophilin-2 (Fragment) - Homo sapiens (Human)

|                              |                    |   |        |        |  |                        |
|------------------------------|--------------------|---|--------|--------|--|------------------------|
| <a href="#">Q9UJ49_HUMAN</a> | -.MTGNYLLTNPLLR.P  | 1 | 2.9367 | 0.2794 |  | <a href="#">Q9UJ49</a> |
| <a href="#">Q9UJ49_HUMAN</a> | -.M*TGNYLLTNPLLR.P | 1 | 2.5212 | 0.1882 |  | <a href="#">Q9UJ49</a> |

Rheumatoid factor D5 light chain (Fragment) - Homo sapiens (Human)

|                              |                        |   |        |        |  |                        |
|------------------------------|------------------------|---|--------|--------|--|------------------------|
| <a href="#">A0N5G5_HUMAN</a> | -.EIVLTQSPATLSLSPGER.A | 2 | 5.2878 | 0.5822 |  | <a href="#">A0N5G5</a> |
|------------------------------|------------------------|---|--------|--------|--|------------------------|

Vitronectin precursor (Serum-spreading factor) (S-protein) (V75) [Contains: Vitronectin

|                            |                        |   |        |        |  |                        |
|----------------------------|------------------------|---|--------|--------|--|------------------------|
| <a href="#">VTNC_HUMAN</a> | K.LIRDVWGIEGPIDAAFTR.I | 2 | 4.9046 | 0.6092 |  | <a href="#">P04004</a> |
|----------------------------|------------------------|---|--------|--------|--|------------------------|

1

28S ribosomal protein S15, mitochondrial precursor (S15mt) (MRP-S15) - Homo sapier

|                            |                  |   |       |        |  |                        |
|----------------------------|------------------|---|-------|--------|--|------------------------|
| <a href="#">RT15_HUMAN</a> | K.IRSYEEHLEKHR.K | 1 | 2.454 | 0.1838 |  | <a href="#">P82914</a> |
|----------------------------|------------------|---|-------|--------|--|------------------------|

Acidic repeat-containing protein - Homo sapiens (Human)

|                              |                        |   |        |        |  |                        |
|------------------------------|------------------------|---|--------|--------|--|------------------------|
| <a href="#">Q96QF7_HUMAN</a> | K.MVKTAGLCSTGEM*WYPKWF | 1 | 2.8106 | 0.1087 |  | <a href="#">Q96QF7</a> |
|------------------------------|------------------------|---|--------|--------|--|------------------------|

Alpha-1-acid glycoprotein 2 precursor (AGP 2) (Orosomucoid-2) (OMD 2) - Homo sapie

|                             |                |   |        |        |  |                        |
|-----------------------------|----------------|---|--------|--------|--|------------------------|
| <a href="#">A1AG2_HUMAN</a> | R.SDVMYTDWKK.D | 1 | 2.9949 | 0.3864 |  | <a href="#">P19652</a> |
|-----------------------------|----------------|---|--------|--------|--|------------------------|

Apolipoprotein D precursor (Apo-D) (ApoD) - Homo sapiens (Human)

|                            |             |   |        |        |  |                        |
|----------------------------|-------------|---|--------|--------|--|------------------------|
| <a href="#">APOD_HUMAN</a> | K.VLNQELR.A | 1 | 2.5001 | 0.1715 |  | <a href="#">P05090</a> |
|----------------------------|-------------|---|--------|--------|--|------------------------|

|                                                                                                                   |                              |                         |   |        |        |    |                        |
|-------------------------------------------------------------------------------------------------------------------|------------------------------|-------------------------|---|--------|--------|----|------------------------|
| Biotinidase precursor (EC 3.5.1.12) - Homo sapiens (Human)                                                        | <a href="#">BTD_HUMAN</a>    | R.LSSGLVTAALYGR.L       | 1 | 2.7985 | 0.3954 |    | <a href="#">P43251</a> |
| Cadherin-13 precursor (Truncated-cadherin) (T-cadherin) (T-cad) (Heart-cadherin) (H-cadherin) (H-cadherin)        | <a href="#">CAD13_HUMAN</a>  | R.INENTGSVSVTR.T        | 1 | 3.5656 | 0.5068 |    | <a href="#">P55290</a> |
| Calcium/calmodulin-dependent protein kinase type IV (EC 2.7.11.17) (CAM kinase-GR)                                | <a href="#">KCC4_HUMAN</a>   | K.GAQAELMKVQALEK.V      | 1 | 2.4358 | 0.1535 |    | <a href="#">Q16566</a> |
| CDNA FLJ45949 fis, clone PLACE7007973 - Homo sapiens (Human)                                                      | <a href="#">Q6ZRZ8_HUMAN</a> | R.DQDERDRAER.K          | 1 | 2.4075 | 0.2236 |    | <a href="#">Q6ZRZ8</a> |
| C-jun-amino-terminal kinase-interacting protein 1 (JNK-interacting protein 1) (JIP-1) (JNK-interacting protein 1) | <a href="#">JIP1_HUMAN</a>   | R.RSTATQMAPPGGPPAAPPGC  | 1 | 3.3722 | 0.2048 |    | <a href="#">Q9UQF2</a> |
| Complement C1s subcomponent precursor (EC 3.4.21.42) (C1 esterase) [Contains: Complement C1s subcomponent]        | <a href="#">C1S_HUMAN</a>    | K.TMQENSTPRED.-         | 1 | 3.3084 | 0.4528 |    | <a href="#">P09871</a> |
| Complement C4-B precursor (Basic complement C4) [Contains: Complement C4 beta chain]                              | <a href="#">CO4B_HUMAN</a>   | K.LQETSNWLLSQQADGSFQI   | 1 | 6.0448 | 0.6761 | 1  | <a href="#">P0C0L5</a> |
| DENN domain-containing protein 2A - Homo sapiens (Human)                                                          | <a href="#">DEN2A_HUMAN</a>  | R.GFIQERELRR.Q          | 1 | 2.7601 | 0.1102 |    | <a href="#">Q9ULE3</a> |
| Eukaryotic translation initiation factor 2 subunit 1 (Eukaryotic translation initiation factor 2 subunit 1)       | <a href="#">IF2A_HUMAN</a>   | R.EVLINNINRR.L          | 1 | 2.7885 | 0.0817 |    | <a href="#">P05198</a> |
| Eukaryotic translation initiation factor 2C 1 (eIF2C 1) (eIF-2C 1) (Argonaute-1) (Putative)                       | <a href="#">I2C1_HUMAN</a>   | K.RVGDTLGGM*ATQCQVVK.N  | 1 | 2.5899 | 0.0981 | 4  | <a href="#">Q9UL18</a> |
| Haptoglobin precursor [Contains: Haptoglobin alpha chain; Haptoglobin beta chain] - Homo sapiens (Human)          | <a href="#">HPT_HUMAN</a>    | K.LRTEGDGVYTLNNEKQWINK. | 1 | 5.2291 | 0.4517 |    | <a href="#">P00738</a> |
| HECT domain and RCC1-like domain-containing protein 2 - Homo sapiens (Human)                                      | <a href="#">HERC2_HUMAN</a>  | R.KDDSVESPGTKK.E        | 1 | 2.4712 | 0.166  |    | <a href="#">Q95714</a> |
| Hemopexin precursor (Beta-1B-glycoprotein) - Homo sapiens (Human)                                                 | <a href="#">HEMO_HUMAN</a>   | R.WKNFSPVDAAFR.Q        | 1 | 3.7199 | 0.5157 |    | <a href="#">P02790</a> |
| HGSC289 (OTTHUMP00000016309) - Homo sapiens (Human)                                                               | <a href="#">Q6UXB8_HUMAN</a> | R.LMVELHNLVYR.A         | 1 | 2.8209 | 0.3497 |    | <a href="#">Q6UXB8</a> |
| Hypothetical protein DKFZp686C15213 - Homo sapiens (Human)                                                        | <a href="#">Q6MZU6_HUMAN</a> | K.TTPPMLDSDGSFFLYSK.L   | 1 | 2.4399 | 0.289  | 1  | <a href="#">Q6MZU6</a> |
| Ig heavy chain V-I region V35 precursor - Homo sapiens (Human)                                                    | <a href="#">HV103_HUMAN</a>  | R.QAPGQGLEWVGR.I        | 1 | 2.4154 | 0.5231 | 1  | <a href="#">P23083</a> |
| Ig heavy chain V-III region TIL - Homo sapiens (Human)                                                            | <a href="#">HV304_HUMAN</a>  | -.EVQLLESGGGLVQPGGSLR.L | 1 | 5.0057 | 0.3081 | 5  | <a href="#">P01765</a> |
| Ig kappa chain V-II region Cum - Homo sapiens (Human)                                                             | <a href="#">KV201_HUMAN</a>  | R.FSGSGSGTDFTLK.I       | 1 | 3.7227 | 0.5767 | 9  | <a href="#">P01614</a> |
| Ig kappa chain V-III region SIE - Homo sapiens (Human)                                                            | <a href="#">KV302_HUMAN</a>  | R.LLIYGASSR.A           | 1 | 3.0887 | 0.3968 | 11 | <a href="#">P01620</a> |
| Ig kappa chain V-IV region precursor (Fragment) - Homo sapiens (Human)                                            | <a href="#">KV401_HUMAN</a>  | K.LLIYWASTR.E           | 1 | 3.159  | 0.3234 | 4  | <a href="#">P06312</a> |
| Ig lambda chain V region 4A precursor - Homo sapiens (Human)                                                      | <a href="#">LV001_HUMAN</a>  | R.FSGSLLGGK.A           | 1 | 2.4491 | 0.2758 | 2  | <a href="#">P04211</a> |
| Ig lambda chain V-I region HA - Homo sapiens (Human)                                                              | <a href="#">LV102_HUMAN</a>  | K.SGTSASLAISGLR.S       | 1 | 2.7397 | 0.4354 | 4  | <a href="#">P01700</a> |
| Ig lambda chain V-IV region HiI - Homo sapiens (Human)                                                            | <a href="#">LV403_HUMAN</a>  | -.SYELTQPPSVSVSPGQTAR.I | 1 | 4.4722 | 0.576  | 1  | <a href="#">P01717</a> |
| IGHG4 protein - Homo sapiens (Human)                                                                              | <a href="#">Q8TC63_HUMAN</a> | K.YGPPCPSCPAPEFLGGPSVFI | 1 | 3.9828 | 0.2976 | 1  | <a href="#">Q8TC63</a> |
| IQ motif and Sec7 domain-containing protein 1 (ADP-ribosylation factors guanine nucleotide exchange factor 1)     |                              |                         |   |        |        |    |                        |

|                                                                                            |                          |   |        |        |   |                        |
|--------------------------------------------------------------------------------------------|--------------------------|---|--------|--------|---|------------------------|
| <a href="#">IQEC1_HUMAN</a>                                                                | R.EIFLFDLLVVTKIFQKK.K    | 1 | 3.6184 | 0.2207 |   | <a href="#">Q6DN90</a> |
| MORC family CW-type zinc finger protein 4 (Zinc finger CW-type coiled-coil domain pr       |                          |   |        |        |   |                        |
| <a href="#">MORC4_HUMAN</a>                                                                | K.VEELEQER.N             | 1 | 2.7648 | 0.1018 | 1 | <a href="#">Q8TE76</a> |
| mTERF domain-containing protein 3, mitochondrial precursor (Mitochondrial transcripti      |                          |   |        |        |   |                        |
| <a href="#">MTER3_HUMAN</a>                                                                | R.PFLACFTYTTDKQSSK.E     | 1 | 2.6832 | 0.2263 |   | <a href="#">Q49AM1</a> |
| Mucin-16 (Ovarian carcinoma antigen CA125) (Ovarian cancer related tumor marker C          |                          |   |        |        |   |                        |
| <a href="#">MUC16_HUMAN</a>                                                                | R.LDPKSPGLNR.E           | 1 | 2.4008 | 0.1221 | 2 | <a href="#">Q8WXI7</a> |
| Myosin-reactive immunoglobulin heavy chain variable region (Fragment) - Homo sapier        |                          |   |        |        |   |                        |
| <a href="#">Q9UL88_HUMAN</a>                                                               | K.SKTDGGTTDYAAPVKGR.L    | 1 | 4.0633 | 0.5484 | 1 | <a href="#">Q9UL88</a> |
| <a href="#">Q9UL94_HUMAN</a>                                                               | -.EVQLVESGAEVK.K         | 1 | 3.6363 | 0.1634 | 2 | <a href="#">Q9UL94</a> |
| Myosin-reactive immunoglobulin light chain variable region (Fragment) - Homo sapiens       |                          |   |        |        |   |                        |
| <a href="#">Q9UL83_HUMAN</a>                                                               | -.EIVMTQSPATLSVSPGER.A   | 1 | 4.7812 | 0.5546 | 1 | <a href="#">Q9UL83</a> |
| PDZ domain-containing RING finger protein 4 (Ligand of Numb-protein X 4) (SEMACAI          |                          |   |        |        |   |                        |
| <a href="#">PZR4_HUMAN</a>                                                                 | K.TTEQGCSAESKEKVLGSK.L   | 1 | 2.6071 | 0.253  |   | <a href="#">Q6ZMN7</a> |
| Plasma protease C1 inhibitor precursor (C1 Inh) (C1Inh) (C1 esterase inhibitor) (C1-inh    |                          |   |        |        |   |                        |
| <a href="#">IC1_HUMAN</a>                                                                  | R.LEDMEQALSPSVFK.A       | 1 | 3.2741 | 0.4692 | 1 | <a href="#">P05155</a> |
| Protein enabled homolog - Homo sapiens (Human)                                             |                          |   |        |        |   |                        |
| <a href="#">ENAH_HUMAN</a>                                                                 | K.IQDHQVVINCAIPKGLK.Y    | 1 | 2.5702 | 0.3103 |   | <a href="#">Q8N8S7</a> |
| Protein FAM32A - Homo sapiens (Human)                                                      |                          |   |        |        |   |                        |
| <a href="#">FA32A_HUMAN</a>                                                                | K.GVAELGVTKR.K           | 1 | 2.8578 | 0.0911 |   | <a href="#">Q9Y421</a> |
| Protein LAP4 (Protein scribble homolog) (hScrib) - Homo sapiens (Human)                    |                          |   |        |        |   |                        |
| <a href="#">LAP4_HUMAN</a>                                                                 | R.ELCIQKAPGERLGISIR.G    | 1 | 2.4801 | 0.2534 |   | <a href="#">Q14160</a> |
| Protein Z-dependent protease inhibitor precursor (PZ-dependent protease inhibitor) (Pz     |                          |   |        |        |   |                        |
| <a href="#">ZPI_HUMAN</a>                                                                  | R.IFSPFADLSELSATGR.N     | 1 | 4.2283 | 0.565  |   | <a href="#">Q9UK55</a> |
| Prothrombin precursor (EC 3.4.21.5) (Coagulation factor II) [Contains: Activation peptid   |                          |   |        |        |   |                        |
| <a href="#">THRB_HUMAN</a>                                                                 | R.TATSEYQTFNPR.T         | 1 | 3.4867 | 0.547  |   | <a href="#">P00734</a> |
| Scaffold attachment factor B (Scaffold attachment factor B1) (SAF-B) (HSP27 estrogen       |                          |   |        |        |   |                        |
| <a href="#">SAFB1_HUMAN</a>                                                                | K.ILDILGETCKSEPVK.E      | 1 | 2.4975 | 0.3008 | 2 | <a href="#">Q15424</a> |
| Serine/threonine-protein kinase ULK2 (EC 2.7.11.1) (Unc-51-like kinase 2) - Homo sap       |                          |   |        |        |   |                        |
| <a href="#">ULK2_HUMAN</a>                                                                 | R.M*FYEKNRSLMPSIPR.E     | 1 | 2.9302 | 0.1474 |   | <a href="#">Q8IYT8</a> |
| Serine/threonine-protein kinase ULK4 (EC 2.7.11.1) (Unc-51-like kinase 4) - Homo sap       |                          |   |        |        |   |                        |
| <a href="#">ULK4_HUMAN</a>                                                                 | K.FDAKILHLPTYSVDK.L      | 1 | 2.9066 | 0.2866 |   | <a href="#">Q96C45</a> |
| Serotransferrin precursor (Transferrin) (Siderophilin) (Beta-1-metal-binding globulin) - H |                          |   |        |        |   |                        |
| <a href="#">TRFE_HUMAN</a>                                                                 | K.MYLGYEYVTAIR.N         | 1 | 3.7743 | 0.5799 | 1 | <a href="#">P02787</a> |
| Serum amyloid A-4 protein precursor (Constitutively expressed serum amyloid A protei       |                          |   |        |        |   |                        |
| <a href="#">SAA4_HUMAN</a>                                                                 | R.SFFKEALQGVGDMGR.A      | 1 | 4.0702 | 0.4166 |   | <a href="#">P35542</a> |
| Sulfhydryl oxidase 1 precursor (EC 1.8.3.2) (Quiescin Q6) (hQSOX) - Homo sapiens (H        |                          |   |        |        |   |                        |
| <a href="#">QSCN6_HUMAN</a>                                                                | K.AHFSPSNIILDFPAAGSAARR. | 1 | 2.4101 | 0.2458 |   | <a href="#">Q00391</a> |
| Tenascin-X precursor (TN-X) (Hexabrachion-like protein) - Homo sapiens (Human)             |                          |   |        |        |   |                        |
| <a href="#">TENX_HUMAN</a>                                                                 | K.ILISGLEPSTPYR.F        | 1 | 2.8274 | 0.3557 | 3 | <a href="#">P22105</a> |
| von Willebrand factor precursor (vWF) [Contains: von Willebrand antigen 2 (von Willeb      |                          |   |        |        |   |                        |
| <a href="#">VWF_HUMAN</a>                                                                  | R.EGGPSQIGDALGFAVR.Y     | 1 | 2.8034 | 0.3595 |   | <a href="#">P04275</a> |
| Zinc finger CCHC domain-containing protein 11 - Homo sapiens (Human)                       |                          |   |        |        |   |                        |
| <a href="#">ZCH11_HUMAN</a>                                                                | R.M*DDFQLKGIVVEEKFKV.W   | 1 | 2.6253 | 0.2739 | 1 | <a href="#">Q5TAX3</a> |

Ceruloplasmin precursor (EC 1.16.3.1) (Ferroxidase) - Homo sapiens (Human)

|                            |                          |   |        |        |  |                        |
|----------------------------|--------------------------|---|--------|--------|--|------------------------|
| <a href="#">CERU_HUMAN</a> | R.KAEELHGLGILGPQLHADVGDK | 3 | 7.6451 | 0.6431 |  | <a href="#">P00450</a> |
| <a href="#">CERU_HUMAN</a> | R.IYHSHIDAPK.D           | 2 | 3.3499 | 0.3644 |  | <a href="#">P00450</a> |

|                            |                           |    |        |        |                        |
|----------------------------|---------------------------|----|--------|--------|------------------------|
| <a href="#">CERU_HUMAN</a> | R.HYYIAAEEIHWNYAPSGIDIFTK | 2  | 5.7136 | 0.5543 | <a href="#">P00450</a> |
| <a href="#">CERU_HUMAN</a> | R.GVYSSDVFDFPGTYQTLEMF    | 1  | 4.5513 | 0.6441 | <a href="#">P00450</a> |
| <a href="#">CERU_HUMAN</a> | R.GVYSSDVFDFPGTYQTLEM*    | 1  | 5.1265 | 0.6163 | <a href="#">P00450</a> |
| <a href="#">CERU_HUMAN</a> | R.GPEEEHLGILGPVIWAIEVGD   | 3  | 6.09   | 0.6182 | <a href="#">P00450</a> |
| <a href="#">CERU_HUMAN</a> | R.FNKNNEGTYSPNYNPQSR.S    | 2  | 5.6801 | 0.5983 | <a href="#">P00450</a> |
| <a href="#">CERU_HUMAN</a> | K.VNKDDEEFIESNK.M         | 4  | 4.6014 | 0.3931 | <a href="#">P00450</a> |
| <a href="#">CERU_HUMAN</a> | K.VDKDNEDFQESNR.M         | 1  | 4.1359 | 0.4584 | <a href="#">P00450</a> |
| <a href="#">CERU_HUMAN</a> | K.WYLFMGNEVDVHAFFHG       | 2  | 5.1022 | 0.6856 | <a href="#">P00450</a> |
| <a href="#">CERU_HUMAN</a> | R.KAEEHLGILGPQLHADVGD     | 2  | 6.0298 | 0.6325 | <a href="#">P00450</a> |
| <a href="#">CERU_HUMAN</a> | R.EYTDASFTNR.K            | 1  | 2.6978 | 0.4603 | <a href="#">P00450</a> |
| <a href="#">CERU_HUMAN</a> | R.KERGPEEEHLGILGPVIAEV    | 1  | 5.9261 | 0.5534 | <a href="#">P00450</a> |
| <a href="#">CERU_HUMAN</a> | R.M*FTTAPDQVDEDEDFQES     | 3  | 4.1471 | 0.5684 | <a href="#">P00450</a> |
| <a href="#">CERU_HUMAN</a> | R.MFTTAPDQVDEDEDFQESN     | 4  | 4.1487 | 0.6296 | <a href="#">P00450</a> |
| <a href="#">CERU_HUMAN</a> | R.PYSIHAHGVTESSTVTPTLP    | 2  | 4.6263 | 0.6516 | <a href="#">P00450</a> |
| <a href="#">CERU_HUMAN</a> | R.QSEDSTFYLGERT           | 2  | 3.2444 | 0.4133 | <a href="#">P00450</a> |
| <a href="#">CERU_HUMAN</a> | R.RPYLKVFNPR.R            | 1  | 3.221  | 0.229  | <a href="#">P00450</a> |
| <a href="#">CERU_HUMAN</a> | R.RQSEDSTFYLGERT          | 1  | 3.6975 | 0.3014 | <a href="#">P00450</a> |
| <a href="#">CERU_HUMAN</a> | R.SGAGTEDSACIPWAYYSTVD    | 1  | 4.0327 | 0.4785 | <a href="#">P00450</a> |
| <a href="#">CERU_HUMAN</a> | R.SVPPSASHVAPTETFTYEWT    | 3  | 3.3365 | 0.4812 | <a href="#">P00450</a> |
| <a href="#">CERU_HUMAN</a> | R.TYYIAAVEVEWDYSPQR.E     | 3  | 5.3405 | 0.5371 | <a href="#">P00450</a> |
| <a href="#">CERU_HUMAN</a> | K.ALYLQYTDETFR.T          | 7  | 4.3867 | 0.5526 | <a href="#">P00450</a> |
| <a href="#">CERU_HUMAN</a> | K.TYSDHPEKVNKDDEEFIESNK   | 2  | 5.4274 | 0.5208 | <a href="#">P00450</a> |
| <a href="#">CERU_HUMAN</a> | R.TTIEKPVWLGLGPIIK.A      | 3  | 4.935  | 0.4856 | <a href="#">P00450</a> |
| <a href="#">CERU_HUMAN</a> | K.DNEDFQESNR.M            | 1  | 3.4326 | 0.3808 | <a href="#">P00450</a> |
| <a href="#">CERU_HUMAN</a> | K.DIASGLIGPLICK.K         | 1  | 3.3087 | 0.5941 | <a href="#">P00450</a> |
| <a href="#">CERU_HUMAN</a> | K.TYSDHPEK.V              | 3  | 2.5164 | 0.3672 | <a href="#">P00450</a> |
| <a href="#">CERU_HUMAN</a> | K.DDEEFIESNK.M            | 1  | 2.8312 | 0.4821 | <a href="#">P00450</a> |
| <a href="#">CERU_HUMAN</a> | K.DIFTGLIGPMK.I           | 3  | 3.2612 | 0.3867 | <a href="#">P00450</a> |
| <a href="#">CERU_HUMAN</a> | K.DVDKEFYLFPTVFDENESLLI   | 1  | 5.5442 | 0.5752 | <a href="#">P00450</a> |
| <a href="#">CERU_HUMAN</a> | K.ERGPEEEHLGILGPVIAEVC    | 5  | 7.2271 | 0.7235 | <a href="#">P00450</a> |
| <a href="#">CERU_HUMAN</a> | K.EVGPTNADPVCLAK.M        | 3  | 3.503  | 0.6483 | <a href="#">P00450</a> |
| <a href="#">CERU_HUMAN</a> | K.GAYPLSIEPIGVR.F         | 3  | 3.5501 | 0.4686 | <a href="#">P00450</a> |
| <a href="#">CERU_HUMAN</a> | K.HYYIGIETTWDYASDHGEK.K   | 16 | 6.7611 | 0.6821 | <a href="#">P00450</a> |
| <a href="#">CERU_HUMAN</a> | K.HYYIGIETTWDYASDHGEK.K   | 1  | 5.2626 | 0.5921 | <a href="#">P00450</a> |
| <a href="#">CERU_HUMAN</a> | K.KLISVDTEHSNIYLQNGPDR.I  | 2  | 4.8661 | 0.581  | <a href="#">P00450</a> |
| <a href="#">CERU_HUMAN</a> | K.NMATRPYSIHAHGVTESSTV    | 2  | 5.883  | 0.6773 | <a href="#">P00450</a> |
| <a href="#">CERU_HUMAN</a> | K.TYCSEPEKVDKDNEDFQESN    | 1  | 4.7784 | 0.4739 | <a href="#">P00450</a> |
| <a href="#">CERU_HUMAN</a> | K.DIFTGLIGPM*K.I          | 1  | 3.2531 | 0.3962 | <a href="#">P00450</a> |
| <a href="#">CERU_HUMAN</a> | K.LISVDTEHSNIYLQNGPDR.I   | 3  | 4.5699 | 0.6463 | <a href="#">P00450</a> |
| <a href="#">CERU_HUMAN</a> | K.NNEGTYSPNYNPQSR.S       | 2  | 4.6069 | 0.5651 | <a href="#">P00450</a> |
| <a href="#">CERU_HUMAN</a> | K.PVWLGLGPIIK.A           | 4  | 4.2241 | 0.5872 | <a href="#">P00450</a> |
| <a href="#">CERU_HUMAN</a> | K.NM*ATRPYSIHAHGVTESST    | 1  | 5.2609 | 0.6473 | <a href="#">P00450</a> |
| <a href="#">CERU_HUMAN</a> | K.NLASRPYTFHSHGITYYK.E    | 3  | 4.6355 | 0.6072 | <a href="#">P00450</a> |
| <a href="#">CERU_HUMAN</a> | K.MYSAVDPTKDIFTGLIGPMK    | 2  | 5.6308 | 0.6386 | <a href="#">P00450</a> |
| <a href="#">CERU_HUMAN</a> | K.MYSAVDPTKDIFTGLIGPM*K   | 2  | 4.5463 | 0.6487 | <a href="#">P00450</a> |
| <a href="#">CERU_HUMAN</a> | K.MYSAVDPTK.D             | 1  | 2.548  | 0.4306 | <a href="#">P00450</a> |
| <a href="#">CERU_HUMAN</a> | K.M*YSAVDPTKDIFTGLIGPM*   | 3  | 4.3103 | 0.6216 | <a href="#">P00450</a> |
| <a href="#">CERU_HUMAN</a> | K.M*YSAVDPTK.D            | 1  | 3.0841 | 0.3815 | <a href="#">P00450</a> |

## Inter-alpha-trypsin inhibitor heavy chain H1 precursor (ITI heavy chain H1) (Inter-alpha-

|                             |                        |   |        |        |                          |
|-----------------------------|------------------------|---|--------|--------|--------------------------|
| <a href="#">ITIH1_HUMAN</a> | R.GFSLDEATNLNGLLR.G    | 5 | 4.3301 | 0.4879 | <a href="#">P19827</a>   |
| <a href="#">ITIH1_HUMAN</a> | R.IYEDHDATQLQGFYSQVAK. | 1 | 5.5506 | 0.6376 | 1 <a href="#">P19827</a> |

|                             |                           |   |        |        |   |                        |
|-----------------------------|---------------------------|---|--------|--------|---|------------------------|
| <a href="#">ITIH1_HUMAN</a> | R.GHMLLENHVER.L           | 1 | 3.3255 | 0.5669 | 1 | <a href="#">P19827</a> |
| <a href="#">ITIH1_HUMAN</a> | R.GM*ADQDGLKPTIDKPSSEDSF  | 1 | 3.9006 | 0.5573 | 1 | <a href="#">P19827</a> |
| <a href="#">ITIH1_HUMAN</a> | R.GMADQDGLKPTIDKPSSEDSPI  | 1 | 5.7865 | 0.5211 | 1 | <a href="#">P19827</a> |
| <a href="#">ITIH1_HUMAN</a> | R.GMADQDGLKPTIDKPSSEDSPI  | 1 | 3.627  | 0.5442 | 1 | <a href="#">P19827</a> |
| <a href="#">ITIH1_HUMAN</a> | R.IADNKQSSFK.A            | 1 | 2.8838 | 0.2609 | 1 | <a href="#">P19827</a> |
| <a href="#">ITIH1_HUMAN</a> | R.GHM*LENHVER.L           | 1 | 2.91   | 0.51   | 1 | <a href="#">P19827</a> |
| <a href="#">ITIH1_HUMAN</a> | R.KAAISGENAGLVR.A         | 2 | 3.885  | 0.45   |   | <a href="#">P19827</a> |
| <a href="#">ITIH1_HUMAN</a> | R.LWAYLTIQELLAK.R         | 6 | 5.2387 | 0.57   | 1 | <a href="#">P19827</a> |
| <a href="#">ITIH1_HUMAN</a> | R.NHM*QYEIVIK.V           | 1 | 2.7384 | 0.3458 |   | <a href="#">P19827</a> |
| <a href="#">ITIH1_HUMAN</a> | R.PTVSQQQSCPTCSTSLLNHG    | 1 | 3.3497 | 0.3206 |   | <a href="#">P19827</a> |
| <a href="#">ITIH1_HUMAN</a> | R.QAVDTAVDGVFIR.S         | 2 | 4.0839 | 0.3928 |   | <a href="#">P19827</a> |
| <a href="#">ITIH1_HUMAN</a> | R.RTFVLSALQPSPTHSSSNTQF   | 1 | 4.3761 | 0.5457 | 1 | <a href="#">P19827</a> |
| <a href="#">ITIH1_HUMAN</a> | R.FAHYVVTQVQVNTANEAR.E    | 2 | 6.9636 | 0.5764 |   | <a href="#">P19827</a> |
| <a href="#">ITIH1_HUMAN</a> | K.ILGDM*QPGDYFDLVLFGR.V   | 1 | 4.43   | 0.3887 |   | <a href="#">P19827</a> |
| <a href="#">ITIH1_HUMAN</a> | R.NHMQYEIVIK.V            | 2 | 3.3445 | 0.4197 |   | <a href="#">P19827</a> |
| <a href="#">ITIH1_HUMAN</a> | R.TMEQFTIHLTVNPQSK.V      | 1 | 3.9388 | 0.4388 |   | <a href="#">P19827</a> |
| <a href="#">ITIH1_HUMAN</a> | K.TAFISDFAVTADGNAFIGDIK.I | 4 | 5.4606 | 0.6804 |   | <a href="#">P19827</a> |
| <a href="#">ITIH1_HUMAN</a> | K.AAISGENAGLVR.A          | 2 | 3.8781 | 0.5339 |   | <a href="#">P19827</a> |
| <a href="#">ITIH1_HUMAN</a> | K.ADVQAHGEGQEFSITCLVDEE   | 1 | 5.246  | 0.4996 | 1 | <a href="#">P19827</a> |
| <a href="#">ITIH1_HUMAN</a> | K.GSLVQASEANLQAAQDFVR.C   | 5 | 6.3263 | 0.6909 |   | <a href="#">P19827</a> |
| <a href="#">ITIH1_HUMAN</a> | K.ILGDMQPGDYFDLVLFGR.V    | 1 | 5.0308 | 0.5904 |   | <a href="#">P19827</a> |
| <a href="#">ITIH1_HUMAN</a> | K.NVVVIDISGSMR.G          | 1 | 3.0241 | 0.5528 |   | <a href="#">P19827</a> |
| <a href="#">ITIH1_HUMAN</a> | K.LDAQASFLPK.E            | 2 | 3.1253 | 0.3793 |   | <a href="#">P19827</a> |
| <a href="#">ITIH1_HUMAN</a> | K.QLVHHFEIDVDIFEPQGISK.L  | 2 | 3.6058 | 0.6141 |   | <a href="#">P19827</a> |
| <a href="#">ITIH1_HUMAN</a> | R.EVAFDLEIPK.T            | 2 | 2.9051 | 0.4001 |   | <a href="#">P19827</a> |
| <a href="#">ITIH1_HUMAN</a> | K.RNHMQYEIVIK.V           | 1 | 3.3047 | 0.3758 |   | <a href="#">P19827</a> |
| <a href="#">ITIH1_HUMAN</a> | K.TAFISDFAVTADGNAFIGDIK.D | 3 | 4.0042 | 0.5208 |   | <a href="#">P19827</a> |
| <a href="#">ITIH1_HUMAN</a> | K.TAFISDFAVTADGNAFIGDIK.D | 1 | 4.3978 | 0.3599 |   | <a href="#">P19827</a> |
| <a href="#">ITIH1_HUMAN</a> | K.VTFQLTYEEVLK.R          | 1 | 2.4282 | 0.3985 |   | <a href="#">P19827</a> |
| <a href="#">ITIH1_HUMAN</a> | K.VTFQLTYEEVLKR.N         | 1 | 3.7568 | 0.5164 |   | <a href="#">P19827</a> |
| <a href="#">ITIH1_HUMAN</a> | R.ERGHMLLENHVER.L         | 1 | 4.1689 | 0.2965 | 1 | <a href="#">P19827</a> |
| <a href="#">ITIH1_HUMAN</a> | K.PLLVDVDLQYPQDAVLALTQM   | 1 | 4.6244 | 0.5786 | 1 | <a href="#">P19827</a> |
| <a href="#">ITIH1_HUMAN</a> | K.QYYEGSEIVVAGR.I         | 4 | 3.9088 | 0.4557 | 1 | <a href="#">P19827</a> |

55

Inter-alpha-trypsin inhibitor heavy chain H2 precursor (ITI heavy chain H2) (Inter-alpha-

|                             |                          |    |        |        |   |                        |
|-----------------------------|--------------------------|----|--------|--------|---|------------------------|
| <a href="#">ITIH2_HUMAN</a> | K.KFYNQVSTPLLR.N         | 1  | 3.5614 | 0.4479 | 1 | <a href="#">P19823</a> |
| <a href="#">ITIH2_HUMAN</a> | K.M*KQTVEAMK.T           | 1  | 2.7198 | 0.3226 | 1 | <a href="#">P19823</a> |
| <a href="#">ITIH2_HUMAN</a> | K.RLSNENHGIAQR.I         | 2  | 3.5736 | 0.3534 | 1 | <a href="#">P19823</a> |
| <a href="#">ITIH2_HUMAN</a> | K.TILDDLRAEDHFSVIDFNQIR  | 1  | 3.1296 | 0.5058 | 1 | <a href="#">P19823</a> |
| <a href="#">ITIH2_HUMAN</a> | K.VQFELHYQEVK.W          | 1  | 3.8888 | 0.3393 | 2 | <a href="#">P19823</a> |
| <a href="#">ITIH2_HUMAN</a> | K.VQSTITSR.M             | 1  | 2.432  | 0.413  | 2 | <a href="#">P19823</a> |
| <a href="#">ITIH2_HUMAN</a> | K.VVNNSPQPQNVVFDVQIPK.G  | 1  | 5.2792 | 0.5828 | 2 | <a href="#">P19823</a> |
| <a href="#">ITIH2_HUMAN</a> | R.AEDHFSVIDFNQIR.T       | 1  | 4.3171 | 0.4332 | 1 | <a href="#">P19823</a> |
| <a href="#">ITIH2_HUMAN</a> | R.FLHVPDTFEGHFDGVPVISK.C | 2  | 4.8977 | 0.6632 | 2 | <a href="#">P19823</a> |
| <a href="#">ITIH2_HUMAN</a> | K.HLEVVDVWVIEPQGLR.F     | 2  | 5.3972 | 0.5897 | 2 | <a href="#">P19823</a> |
| <a href="#">ITIH2_HUMAN</a> | R.KLWAYLTINQLLAER.S      | 3  | 5.6257 | 0.5946 | 1 | <a href="#">P19823</a> |
| <a href="#">ITIH2_HUMAN</a> | R.ETAVDGELVVLYDVK.R      | 14 | 5.0392 | 0.6434 | 1 | <a href="#">P19823</a> |
| <a href="#">ITIH2_HUMAN</a> | R.LSNENHGIAQR.I          | 2  | 3.7332 | 0.4238 | 1 | <a href="#">P19823</a> |
| <a href="#">ITIH2_HUMAN</a> | R.M*ATTMIQSK.V           | 1  | 2.5179 | 0.464  | 2 | <a href="#">P19823</a> |
| <a href="#">ITIH2_HUMAN</a> | R.M*LADAPPQDPSCCSGALYY.C | 2  | 4.2002 | 0.5912 | 1 | <a href="#">P19823</a> |
| <a href="#">ITIH2_HUMAN</a> | R.MATTMIQSK.V            | 1  | 2.6594 | 0.4986 | 2 | <a href="#">P19823</a> |
| <a href="#">ITIH2_HUMAN</a> | R.MLADAPPQDPSCCSGALYYG   | 1  | 3.5959 | 0.4354 | 1 | <a href="#">P19823</a> |

|                             |                           |   |        |        |   |                        |
|-----------------------------|---------------------------|---|--------|--------|---|------------------------|
| <a href="#">ITIH2_HUMAN</a> | R.NVQFNYPHTSVTDVTDVQNNFH  | 1 | 5.7687 | 0.5076 | 1 | <a href="#">P19823</a> |
| <a href="#">ITIH2_HUMAN</a> | R.SILQM*SLDHHIVTPLTSLVIEN | 1 | 6.4134 | 0.6228 | 1 | <a href="#">P19823</a> |
| <a href="#">ITIH2_HUMAN</a> | R.SILQMSLDHHIVTPLTSLVIEN  | 1 | 4.8709 | 0.5002 | 1 | <a href="#">P19823</a> |
| <a href="#">ITIH2_HUMAN</a> | R.SSALDMENFR.T            | 1 | 3.3624 | 0.3791 | 2 | <a href="#">P19823</a> |
| <a href="#">ITIH2_HUMAN</a> | R.TEVNVLPGAK.V            | 1 | 3.008  | 0.4963 | 2 | <a href="#">P19823</a> |
| <a href="#">ITIH2_HUMAN</a> | R.IYGNQDTSSQLKK.F         | 1 | 4.0493 | 0.4489 | 1 | <a href="#">P19823</a> |
| <a href="#">ITIH2_HUMAN</a> | K.FYNQVSTPLLR.N           | 3 | 2.8129 | 0.3361 | 1 | <a href="#">P19823</a> |
| <a href="#">ITIH2_HUMAN</a> | K.DKHADPDFTR.K            | 1 | 2.6516 | 0.4015 | 1 | <a href="#">P19823</a> |
| <a href="#">ITIH2_HUMAN</a> | K.AHVSFKPTVAQQR.I         | 2 | 3.4951 | 0.4652 | 2 | <a href="#">P19823</a> |
| <a href="#">ITIH2_HUMAN</a> | K.AGELEVFNGYFVHFFAPDNLI   | 3 | 5.5355 | 0.5734 | 1 | <a href="#">P19823</a> |
| <a href="#">ITIH2_HUMAN</a> | R.IYGNQDTSSQLK.K          | 2 | 3.7803 | 0.4743 | 1 | <a href="#">P19823</a> |
| <a href="#">ITIH2_HUMAN</a> | K.HADPDFTR.K              | 1 | 2.4434 | 0.3433 | 1 | <a href="#">P19823</a> |

### Complement C3 precursor [Contains: Complement C3 beta chain; Complement C3 alpha]

|                           |                          |   |        |        |  |                        |
|---------------------------|--------------------------|---|--------|--------|--|------------------------|
| <a href="#">CO3_HUMAN</a> | K.QLYNVEATSYALLALLQLK.D  | 1 | 7.0806 | 0.534  |  | <a href="#">P01024</a> |
| <a href="#">CO3_HUMAN</a> | K.VLLDGVQNP.R.A          | 1 | 3.5023 | 0.56   |  | <a href="#">P01024</a> |
| <a href="#">CO3_HUMAN</a> | K.VQLSNDFDEYIM*AIEQTIK.S | 1 | 5.0867 | 0.6095 |  | <a href="#">P01024</a> |
| <a href="#">CO3_HUMAN</a> | K.VQLSNDFDEYIMAIEQTIK.S  | 1 | 5.9006 | 0.6729 |  | <a href="#">P01024</a> |
| <a href="#">CO3_HUMAN</a> | R.AYYENSPQQVFSTEFVK.E    | 1 | 3.6456 | 0.5693 |  | <a href="#">P01024</a> |
| <a href="#">CO3_HUMAN</a> | R.EGVQKEDIPPADLSDQVPDTE  | 2 | 5.4599 | 0.548  |  | <a href="#">P01024</a> |
| <a href="#">CO3_HUMAN</a> | R.EPGQDLVVLPLSITDFIPFR   | 1 | 4.5304 | 0.63   |  | <a href="#">P01024</a> |
| <a href="#">CO3_HUMAN</a> | R.EVVADSVWVDVK.D         | 1 | 3.415  | 0.5514 |  | <a href="#">P01024</a> |
| <a href="#">CO3_HUMAN</a> | R.ILLQGTPVAQMTEDAVER.I   | 3 | 5.3076 | 0.65   |  | <a href="#">P01024</a> |
| <a href="#">CO3_HUMAN</a> | K.VHQYFNVELIQPGAVK.V     | 1 | 4.1212 | 0.4023 |  | <a href="#">P01024</a> |
| <a href="#">CO3_HUMAN</a> | R.KVLLDGVQNP.R.A         | 1 | 2.8749 | 0.3083 |  | <a href="#">P01024</a> |
| <a href="#">CO3_HUMAN</a> | K.KVEGTAFFVIFGIQDGEQR.I  | 1 | 4.5362 | 0.5451 |  | <a href="#">P01024</a> |
| <a href="#">CO3_HUMAN</a> | R.LVAYYTLIGASQQR.E       | 1 | 3.7569 | 0.5578 |  | <a href="#">P01024</a> |
| <a href="#">CO3_HUMAN</a> | R.SGIPIVTSYQIHFTK.T      | 1 | 4.1842 | 0.5855 |  | <a href="#">P01024</a> |
| <a href="#">CO3_HUMAN</a> | R.SNLDEIIAENIVSR.S       | 1 | 3.416  | 0.4836 |  | <a href="#">P01024</a> |
| <a href="#">CO3_HUMAN</a> | R.SYTVAIAGYALQMG.R.L     | 1 | 2.709  | 0.327  |  | <a href="#">P01024</a> |
| <a href="#">CO3_HUMAN</a> | R.TELRPGETLNVNLLR.M      | 1 | 5.172  | 0.5062 |  | <a href="#">P01024</a> |
| <a href="#">CO3_HUMAN</a> | R.TVMVNIENPEGIPVK.Q      | 1 | 3.9038 | 0.4554 |  | <a href="#">P01024</a> |
| <a href="#">CO3_HUMAN</a> | R.IPIEDGSGEVVLSR.K       | 1 | 3.2239 | 0.4655 |  | <a href="#">P01024</a> |
| <a href="#">CO3_HUMAN</a> | K.DICEEQVNSLPGSITK.A     | 1 | 2.7751 | 0.4603 |  | <a href="#">P01024</a> |
| <a href="#">CO3_HUMAN</a> | K.AGDFLEANYM*NLQR.S      | 2 | 4.0918 | 0.4953 |  | <a href="#">P01024</a> |
| <a href="#">CO3_HUMAN</a> | K.AGDFLEANYMNLQR.S       | 1 | 4.4307 | 0.4475 |  | <a href="#">P01024</a> |
| <a href="#">CO3_HUMAN</a> | K.TGLQEVEVK.A            | 1 | 3.3167 | 0.3936 |  | <a href="#">P01024</a> |
| <a href="#">CO3_HUMAN</a> | K.SSLVPPYVIVPLK.T        | 1 | 3.0082 | 0.3409 |  | <a href="#">P01024</a> |
| <a href="#">CO3_HUMAN</a> | R.SEETKENEFTVTAEGK.G     | 1 | 4.6189 | 0.594  |  | <a href="#">P01024</a> |
| <a href="#">CO3_HUMAN</a> | K.SGQSEDRQPVPQQMTLK.I    | 1 | 4.5269 | 0.5515 |  | <a href="#">P01024</a> |
| <a href="#">CO3_HUMAN</a> | R.VPVAVQGEDTVQSLTQGDV    | 2 | 5.8495 | 0.7364 |  | <a href="#">P01024</a> |
| <a href="#">CO3_HUMAN</a> | K.QELSEAEQATR.T          | 1 | 3.3018 | 0.2988 |  | <a href="#">P01024</a> |
| <a href="#">CO3_HUMAN</a> | K.RIPIEDGSGEVVLSR.K      | 2 | 5.1026 | 0.5708 |  | <a href="#">P01024</a> |
| <a href="#">CO3_HUMAN</a> | K.TIYTPGSTVLYR.I         | 1 | 2.6206 | 0.5093 |  | <a href="#">P01024</a> |
| <a href="#">CO3_HUMAN</a> | K.EDIPPADLSDQVPDTESETR.I | 1 | 4.5135 | 0.6871 |  | <a href="#">P01024</a> |
| <a href="#">CO3_HUMAN</a> | K.EYVLPSEFVIVEPTEK.F     | 2 | 5.0068 | 0.5148 |  | <a href="#">P01024</a> |
| <a href="#">CO3_HUMAN</a> | K.FYIYNEK.G              | 1 | 2.6681 | 0.3195 |  | <a href="#">P01024</a> |
| <a href="#">CO3_HUMAN</a> | K.GQGTLVVVTMYHAK.A       | 3 | 3.446  | 0.5516 |  | <a href="#">P01024</a> |
| <a href="#">CO3_HUMAN</a> | K.KGYTQQLAFR.Q           | 1 | 3.3841 | 0.4461 |  | <a href="#">P01024</a> |
| <a href="#">CO3_HUMAN</a> | K.KQELSEAEQATR.T         | 2 | 4.161  | 0.4019 |  | <a href="#">P01024</a> |
| <a href="#">CO3_HUMAN</a> | K.LSINTHPSQKPLSITVR.T    | 1 | 4.9425 | 0.5476 |  | <a href="#">P01024</a> |
| <a href="#">CO3_HUMAN</a> | K.AAVYHHFISDGV.RK.S      | 1 | 3.3434 | 0.4289 |  | <a href="#">P01024</a> |

|                           |                       |   |        |        |  |                        |
|---------------------------|-----------------------|---|--------|--------|--|------------------------|
| <a href="#">CO3_HUMAN</a> | K.SDDKVTLEER.L        | 1 | 2.9032 | 0.1551 |  | <a href="#">P01024</a> |
| <a href="#">CO3_HUMAN</a> | R.YYGGYGSTQATFMVFQALA | 2 | 5.5775 | 0.6776 |  | <a href="#">P01024</a> |
| <a href="#">CO3_HUMAN</a> | R.YYTYLIMNK.G         | 1 | 2.804  | 0.4252 |  | <a href="#">P01024</a> |

27

Apolipoprotein A-I precursor (Apo-AI) (ApoA-I) [Contains: Apolipoprotein A-I(1-242)] - F

|                             |                        |   |        |        |  |                        |
|-----------------------------|------------------------|---|--------|--------|--|------------------------|
| <a href="#">APOA1_HUMAN</a> | R.QEMSKDLEEVK.A        | 2 | 3.0563 | 0.2414 |  | <a href="#">P02647</a> |
| <a href="#">APOA1_HUMAN</a> | R.QEM*SKDLEEVK.A       | 1 | 2.4545 | 0.193  |  | <a href="#">P02647</a> |
| <a href="#">APOA1_HUMAN</a> | R.LEALKENGGAR.L        | 1 | 3.2411 | 0.3159 |  | <a href="#">P02647</a> |
| <a href="#">APOA1_HUMAN</a> | R.EQLGPVTQEFWDNLEK.E   | 1 | 4.0239 | 0.5692 |  | <a href="#">P02647</a> |
| <a href="#">APOA1_HUMAN</a> | R.DYVSQFEGSALGK.Q      | 2 | 3.6179 | 0.5883 |  | <a href="#">P02647</a> |
| <a href="#">APOA1_HUMAN</a> | K.WQEEM*ELYR.Q         | 1 | 3.0536 | 0.4112 |  | <a href="#">P02647</a> |
| <a href="#">APOA1_HUMAN</a> | R.THLAPYSDEL.R.Q       | 1 | 2.9938 | 0.4554 |  | <a href="#">P02647</a> |
| <a href="#">APOA1_HUMAN</a> | K.VEPLRAELQEGAR.Q      | 1 | 2.9413 | 0.3149 |  | <a href="#">P02647</a> |
| <a href="#">APOA1_HUMAN</a> | K.LREQLGPVTQEFWDNLEK.E | 2 | 5.776  | 0.6025 |  | <a href="#">P02647</a> |
| <a href="#">APOA1_HUMAN</a> | K.LLDNWDSVTSTFSK.L     | 5 | 4.7755 | 0.6181 |  | <a href="#">P02647</a> |
| <a href="#">APOA1_HUMAN</a> | K.ETEGLRQEM*SKDLEEVK.A | 1 | 3.6306 | 0.478  |  | <a href="#">P02647</a> |
| <a href="#">APOA1_HUMAN</a> | K.ETEGLRQEM*SK.D       | 1 | 2.9893 | 0.434  |  | <a href="#">P02647</a> |
| <a href="#">APOA1_HUMAN</a> | K.DSGRDYVSQFEGSALGK.Q  | 2 | 5.1248 | 0.5602 |  | <a href="#">P02647</a> |
| <a href="#">APOA1_HUMAN</a> | K.DLATVYVDVLK.D        | 1 | 3.449  | 0.5452 |  | <a href="#">P02647</a> |
| <a href="#">APOA1_HUMAN</a> | K.VSFLSALEEYTK.K       | 2 | 4.5202 | 0.5629 |  | <a href="#">P02647</a> |
| <a href="#">APOA1_HUMAN</a> | K.KWQEEM*ELYR.Q        | 1 | 2.482  | 0.1893 |  | <a href="#">P02647</a> |
| <a href="#">APOA1_HUMAN</a> | R.VKDLATVYVDVLK.D      | 2 | 3.6441 | 0.4916 |  | <a href="#">P02647</a> |

17

Serum albumin precursor - Homo sapiens (Human)

|                            |                       |   |        |        |   |                        |
|----------------------------|-----------------------|---|--------|--------|---|------------------------|
| <a href="#">ALBU_HUMAN</a> | K.VFDEFKPLVEEPQNLK.Q  | 2 | 5.2812 | 0.4844 | 2 | <a href="#">P02768</a> |
| <a href="#">ALBU_HUMAN</a> | K.AAFTECCQAADK.A      | 1 | 2.7008 | 0.2506 | 1 | <a href="#">P02768</a> |
| <a href="#">ALBU_HUMAN</a> | K.ADDKETCFEEGKK.L     | 1 | 4.0691 | 0.3857 | 2 | <a href="#">P02768</a> |
| <a href="#">ALBU_HUMAN</a> | K.AVM*DDFAAFVEK.C     | 1 | 3.4885 | 0.5582 | 2 | <a href="#">P02768</a> |
| <a href="#">ALBU_HUMAN</a> | K.DVFLGM*FLYEYAR.R    | 1 | 3.0526 | 0.4635 | 1 | <a href="#">P02768</a> |
| <a href="#">ALBU_HUMAN</a> | K.FQNALLVR.Y          | 2 | 2.9109 | 0.2511 | 2 | <a href="#">P02768</a> |
| <a href="#">ALBU_HUMAN</a> | K.KQTALVELVK.H        | 2 | 3.6835 | 0.3782 | 2 | <a href="#">P02768</a> |
| <a href="#">ALBU_HUMAN</a> | K.KVPQVSTPTLVEVSR.N   | 2 | 5.4103 | 0.5659 | 2 | <a href="#">P02768</a> |
| <a href="#">ALBU_HUMAN</a> | K.LVAASQAALGL.-       | 1 | 2.8613 | 0.6112 | 1 | <a href="#">P02768</a> |
| <a href="#">ALBU_HUMAN</a> | K.SLHTLFGDKLCTVATLR.E | 1 | 4.0645 | 0.4032 | 2 | <a href="#">P02768</a> |
| <a href="#">ALBU_HUMAN</a> | R.RHPDYSVLLLR.L       | 1 | 4.6162 | 0.4266 | 1 | <a href="#">P02768</a> |
| <a href="#">ALBU_HUMAN</a> | R.RHPYFYAPPELLFFAK.R  | 1 | 5.0501 | 0.4556 | 1 | <a href="#">P02768</a> |
| <a href="#">ALBU_HUMAN</a> | K.LVNEVTEFAK.T        | 1 | 2.9605 | 0.4236 | 2 | <a href="#">P02768</a> |

15

Kininogen-1 precursor (Alpha-2-thiol proteinase inhibitor) [Contains: Kininogen-1 heavy

|                            |                          |   |        |        |   |                        |
|----------------------------|--------------------------|---|--------|--------|---|------------------------|
| <a href="#">KNG1_HUMAN</a> | K.TWQDCEYKDKAAK.A        | 2 | 3.5975 | 0.4724 |   | <a href="#">P01042</a> |
| <a href="#">KNG1_HUMAN</a> | R.DIPTNSPELEETLTHITK.L   | 1 | 4.0214 | 0.6718 | 1 | <a href="#">P01042</a> |
| <a href="#">KNG1_HUMAN</a> | K.YFIDFVAR.E             | 2 | 3.2398 | 0.4482 | 1 | <a href="#">P01042</a> |
| <a href="#">KNG1_HUMAN</a> | K.TVGSDFYSFK.Y           | 1 | 3.7619 | 0.6191 |   | <a href="#">P01042</a> |
| <a href="#">KNG1_HUMAN</a> | K.SVSEINPTTQMK.E         | 1 | 3.265  | 0.4728 |   | <a href="#">P01042</a> |
| <a href="#">KNG1_HUMAN</a> | K.LDDDLEHQGGHVLHDHGK.H   | 1 | 4.0196 | 0.5616 |   | <a href="#">P01042</a> |
| <a href="#">KNG1_HUMAN</a> | K.KYNSQNSNNQFVLYR.I      | 1 | 5.3583 | 0.5685 |   | <a href="#">P01042</a> |
| <a href="#">KNG1_HUMAN</a> | K.KYFIDFVAR.E            | 1 | 3.3106 | 0.422  | 1 | <a href="#">P01042</a> |
| <a href="#">KNG1_HUMAN</a> | K.ICVGCPRDIPTNSPELEETLT- | 1 | 3.8333 | 0.5063 | 1 | <a href="#">P01042</a> |
| <a href="#">KNG1_HUMAN</a> | K.AVDAALKK.Y             | 1 | 2.5985 | 0.3204 |   | <a href="#">P01042</a> |
| <a href="#">KNG1_HUMAN</a> | K.AATGECTATVGK.R         | 1 | 3.0333 | 0.4774 |   | <a href="#">P01042</a> |
| <a href="#">KNG1_HUMAN</a> | K.YNSQNSNNQFVLYR.I       | 2 | 4.7637 | 0.4967 |   | <a href="#">P01042</a> |

13

## Alpha-2-macroglobulin precursor (Alpha-2-M) - Homo sapiens (Human)

|                            |                          |   |        |        |  |                        |
|----------------------------|--------------------------|---|--------|--------|--|------------------------|
| <a href="#">A2MG_HUMAN</a> | R.VGFYESDVMGR.G          | 1 | 3.4327 | 0.453  |  | <a href="#">P01023</a> |
| <a href="#">A2MG_HUMAN</a> | K.AIGYLNTGYQR.Q          | 2 | 3.2163 | 0.4049 |  | <a href="#">P01023</a> |
| <a href="#">A2MG_HUMAN</a> | K.DTVIKPLLVEPEGLEK.E     | 1 | 4.5551 | 0.3496 |  | <a href="#">P01023</a> |
| <a href="#">A2MG_HUMAN</a> | K.HYDGSYSTFGER.Y         | 1 | 3.2909 | 0.4886 |  | <a href="#">P01023</a> |
| <a href="#">A2MG_HUMAN</a> | K.LPPNVVEESAR.A          | 1 | 3.2042 | 0.5496 |  | <a href="#">P01023</a> |
| <a href="#">A2MG_HUMAN</a> | K.NEDSLVQVQTDK.S         | 1 | 3.7339 | 0.5924 |  | <a href="#">P01023</a> |
| <a href="#">A2MG_HUMAN</a> | K.QQNAQGGFSSTQDTVVALHA   | 1 | 3.6958 | 0.4238 |  | <a href="#">P01023</a> |
| <a href="#">A2MG_HUMAN</a> | R.LLLQQVSLPELPGEYSMK.V   | 1 | 4.8947 | 0.5549 |  | <a href="#">P01023</a> |
| <a href="#">A2MG_HUMAN</a> | R.TEHPFTVEEFVLPK.F       | 1 | 3.9112 | 0.3843 |  | <a href="#">P01023</a> |
| <a href="#">A2MG_HUMAN</a> | R.VTAAPQSVCALR.A         | 1 | 2.6093 | 0.3587 |  | <a href="#">P01023</a> |
| <a href="#">A2MG_HUMAN</a> | R.VVSM*DENFHPLNELIPLVYIQ | 1 | 3.5563 | 0.3329 |  | <a href="#">P01023</a> |
| <a href="#">A2MG_HUMAN</a> | R.SASNMAIVDVK.M          | 1 | 2.6079 | 0.3071 |  | <a href="#">P01023</a> |

12

## Complement C4-A precursor (Acidic complement C4) [Contains: Complement C4 beta

|                            |                         |   |        |        |   |                        |
|----------------------------|-------------------------|---|--------|--------|---|------------------------|
| <a href="#">CO4A_HUMAN</a> | K.LHLETDLALVALGALDTALY/ | 1 | 4.7529 | 0.5953 | 3 | <a href="#">P0C0L4</a> |
| <a href="#">CO4A_HUMAN</a> | R.VGDTLNLNLR.A          | 1 | 3.4732 | 0.4319 | 3 | <a href="#">P0C0L4</a> |
| <a href="#">CO4A_HUMAN</a> | R.VFALDQK.M             | 1 | 2.5503 | 0.1977 | 3 | <a href="#">P0C0L4</a> |
| <a href="#">CO4A_HUMAN</a> | R.STQDTVIALDALSAYWIASHT | 1 | 4.2578 | 0.6131 | 3 | <a href="#">P0C0L4</a> |
| <a href="#">CO4A_HUMAN</a> | R.HLVPGAPFLQALVR.E      | 1 | 2.7498 | 0.4302 | 3 | <a href="#">P0C0L4</a> |
| <a href="#">CO4A_HUMAN</a> | R.GPEVQLVAHSPWLK.D      | 1 | 2.8358 | 0.4485 | 3 | <a href="#">P0C0L4</a> |
| <a href="#">CO4A_HUMAN</a> | R.GLQDEGYR.M            | 1 | 2.5968 | 0.5206 | 3 | <a href="#">P0C0L4</a> |
| <a href="#">CO4A_HUMAN</a> | R.DSSTWLTAFVLK.V        | 1 | 2.6235 | 0.3397 | 2 | <a href="#">P0C0L4</a> |
| <a href="#">CO4A_HUMAN</a> | K.VLSLAQEQVGGSPK.L      | 2 | 5.1059 | 0.6161 | 3 | <a href="#">P0C0L4</a> |
| <a href="#">CO4A_HUMAN</a> | K.LNMGITDLQGLR.L        | 1 | 2.5586 | 0.2846 | 3 | <a href="#">P0C0L4</a> |
| <a href="#">CO4A_HUMAN</a> | R.YYGKPVQGVAYVR.F       | 1 | 3.2959 | 0.5991 | 3 | <a href="#">P0C0L4</a> |

## Fibronectin precursor (FN) (Cold-insoluble globulin) (CIG) - Homo sapiens (Human)

|                            |                         |   |        |        |   |                        |
|----------------------------|-------------------------|---|--------|--------|---|------------------------|
| <a href="#">FINC_HUMAN</a> | K.WLPSSSPVTGYR.V        | 1 | 3.1163 | 0.4837 | 1 | <a href="#">P02751</a> |
| <a href="#">FINC_HUMAN</a> | R.RPGGEPSPGTTGQSYNQY    | 1 | 5.4137 | 0.5425 |   | <a href="#">P02751</a> |
| <a href="#">FINC_HUMAN</a> | R.TEIDKPSQMQVTDVQDNSISV | 1 | 5.5515 | 0.3436 | 1 | <a href="#">P02751</a> |
| <a href="#">FINC_HUMAN</a> | R.VPGTSTSATLTLGLTR.G    | 1 | 3.1377 | 0.4841 | 1 | <a href="#">P02751</a> |
| <a href="#">FINC_HUMAN</a> | K.IYLYTLNDNAR.S         | 1 | 3.8327 | 0.416  | 1 | <a href="#">P02751</a> |
| <a href="#">FINC_HUMAN</a> | K.VTIMWTPPESAVTGYR.V    | 1 | 3.4243 | 0.5166 | 1 | <a href="#">P02751</a> |
| <a href="#">FINC_HUMAN</a> | R.ITYGETGGNSPVQEFTVPGS  | 1 | 4.488  | 0.5134 | 1 | <a href="#">P02751</a> |
| <a href="#">FINC_HUMAN</a> | R.NLQPASEYTVSLVAIK.G    | 1 | 3.227  | 0.4345 | 1 | <a href="#">P02751</a> |
| <a href="#">FINC_HUMAN</a> | R.NTFAEVTGLSPGVYYFK.V   | 1 | 3.7594 | 0.5942 | 1 | <a href="#">P02751</a> |
| <a href="#">FINC_HUMAN</a> | R.WKCDPVDQCQDSETGTFYQI  | 1 | 4.5905 | 0.4025 | 2 | <a href="#">P02751</a> |
| <a href="#">FINC_HUMAN</a> | R.WSRPQAPITGYR.I        | 1 | 3.6001 | 0.346  | 1 | <a href="#">P02751</a> |
| <a href="#">FINC_HUMAN</a> | K.LGVRPSQGGEAPR.E       | 1 | 2.6399 | 0.265  | 1 | <a href="#">P02751</a> |

11

## Apolipoprotein B-100 precursor (Apo B-100) [Contains: Apolipoprotein B-48 (Apo B-48)

|                            |                           |   |        |        |  |                        |
|----------------------------|---------------------------|---|--------|--------|--|------------------------|
| <a href="#">APOB_HUMAN</a> | K.YNALDLTNNKG.L           | 1 | 2.7654 | 0.1942 |  | <a href="#">P04114</a> |
| <a href="#">APOB_HUMAN</a> | K.AVSM*PSFSILGSDVR.V      | 1 | 4.0603 | 0.5483 |  | <a href="#">P04114</a> |
| <a href="#">APOB_HUMAN</a> | K.ENFAGEATLQR.I           | 1 | 2.5091 | 0.4312 |  | <a href="#">P04114</a> |
| <a href="#">APOB_HUMAN</a> | K.FPEVDVLT.K.Y            | 1 | 2.9504 | 0.3317 |  | <a href="#">P04114</a> |
| <a href="#">APOB_HUMAN</a> | K.ALVEQGFTVPEIK.T         | 1 | 2.5383 | 0.2644 |  | <a href="#">P04114</a> |
| <a href="#">APOB_HUMAN</a> | R.M*YQM*DIQQELQR.Y        | 1 | 3.4837 | 0.3835 |  | <a href="#">P04114</a> |
| <a href="#">APOB_HUMAN</a> | K.NLTDFAEQYSIQDWAK.R      | 1 | 2.4487 | 0.2359 |  | <a href="#">P04114</a> |
| <a href="#">APOB_HUMAN</a> | K.IAELSATAQEIIK.S         | 1 | 2.8708 | 0.3884 |  | <a href="#">P04114</a> |
| <a href="#">APOB_HUMAN</a> | K.NFVASHIANILNSEELDIQDLKI | 1 | 6.4638 | 0.4767 |  | <a href="#">P04114</a> |



|                            |                 |   |        |        |                        |
|----------------------------|-----------------|---|--------|--------|------------------------|
| <a href="#">APOB_HUMAN</a> | R.SPSQADINK.I   | 1 | 3      | 0.3132 | <a href="#">P04114</a> |
| <a href="#">APOB_HUMAN</a> | R.SEYQADYESLR.F | 1 | 3.1846 | 0.5405 | <a href="#">P04114</a> |

9

Inter-alpha-trypsin inhibitor heavy chain H4 precursor (ITI heavy chain H4) (Inter-alpha-

|                             |                          |   |        |        |   |                        |
|-----------------------------|--------------------------|---|--------|--------|---|------------------------|
| <a href="#">ITIH4_HUMAN</a> | K.LALDNGGLAR.R           | 1 | 2.6888 | 0.3256 | 1 | <a href="#">Q14624</a> |
| <a href="#">ITIH4_HUMAN</a> | K.EKAEAAQYSAAVAK.G       | 1 | 4.3265 | 0.6481 | 1 | <a href="#">Q14624</a> |
| <a href="#">ITIH4_HUMAN</a> | K.AEAQAQYSAAVAK.G        | 1 | 4.6531 | 0.5173 | 1 | <a href="#">Q14624</a> |
| <a href="#">ITIH4_HUMAN</a> | K.ILDDLSPR.D             | 1 | 2.8798 | 0.1937 | 1 | <a href="#">Q14624</a> |
| <a href="#">ITIH4_HUMAN</a> | R.LGVYELLLK.V            | 1 | 2.725  | 0.5061 | 1 | <a href="#">Q14624</a> |
| <a href="#">ITIH4_HUMAN</a> | K.LQDRGPDVLTATVSGK.L     | 1 | 3.0593 | 0.496  | 1 | <a href="#">Q14624</a> |
| <a href="#">ITIH4_HUMAN</a> | K.SPEQQETVLDGNLIIR.Y     | 1 | 4.7218 | 0.4493 | 1 | <a href="#">Q14624</a> |
| <a href="#">ITIH4_HUMAN</a> | R.DQFNLIIVFSTEATQWRPSLVF | 1 | 5.3314 | 0.4925 | 1 | <a href="#">Q14624</a> |
| <a href="#">ITIH4_HUMAN</a> | R.GPDVLTATVSGK.L         | 1 | 3.1508 | 0.5252 | 1 | <a href="#">Q14624</a> |

Lumican precursor (Keratan sulfate proteoglycan lumican) (KSPG lumican) - Homo sap

|                           |                       |   |        |        |  |                        |
|---------------------------|-----------------------|---|--------|--------|--|------------------------|
| <a href="#">LUM_HUMAN</a> | R.LKEDAVSAAFK.G       | 1 | 3.3321 | 0.3572 |  | <a href="#">P51884</a> |
| <a href="#">LUM_HUMAN</a> | R.LPSGLPVSLTLYLDNNK.I | 2 | 5.5251 | 0.6226 |  | <a href="#">P51884</a> |
| <a href="#">LUM_HUMAN</a> | R.FNALQYLR.L          | 1 | 3.0957 | 0.2872 |  | <a href="#">P51884</a> |
| <a href="#">LUM_HUMAN</a> | K.SLEYLDLSFNQIAR.L    | 1 | 4.4958 | 0.4373 |  | <a href="#">P51884</a> |
| <a href="#">LUM_HUMAN</a> | K.SLEDLQLTHNK.I       | 2 | 2.8885 | 0.473  |  | <a href="#">P51884</a> |
| <a href="#">LUM_HUMAN</a> | K.RFNALQYLR.L         | 1 | 3.3418 | 0.2566 |  | <a href="#">P51884</a> |
| <a href="#">LUM_HUMAN</a> | R.NNQIDHIDEK.A        | 1 | 3.2258 | 0.3067 |  | <a href="#">P51884</a> |

8

Ig mu heavy chain disease protein (BOT) - Homo sapiens (Human)

|                            |                      |   |        |        |   |                        |
|----------------------------|----------------------|---|--------|--------|---|------------------------|
| <a href="#">MUCB_HUMAN</a> | K.YVTSAPM*PEPQAPGR.Y | 1 | 3.2687 | 0.5713 | 5 | <a href="#">P04220</a> |
| <a href="#">MUCB_HUMAN</a> | K.YVTSAPMPEPQAPGR.Y  | 2 | 3.7309 | 0.6551 | 5 | <a href="#">P04220</a> |
| <a href="#">MUCB_HUMAN</a> | K.VSVFVPPR.D         | 1 | 2.5387 | 0.4638 | 5 | <a href="#">P04220</a> |
| <a href="#">MUCB_HUMAN</a> | K.QVSGVTTDEVEAEAK.E  | 1 | 3.0672 | 0.433  |   | <a href="#">P04220</a> |
| <a href="#">MUCB_HUMAN</a> | K.LICQATGFSPR.Q      | 1 | 3.6477 | 0.534  | 5 | <a href="#">P04220</a> |
| <a href="#">MUCB_HUMAN</a> | K.GVALHRPDVYLLPPAR.E | 1 | 4.452  | 0.5188 | 5 | <a href="#">P04220</a> |
| <a href="#">MUCB_HUMAN</a> | R.VFAIPPSFASIFLTK.S  | 1 | 2.88   | 0.5408 | 5 | <a href="#">P04220</a> |

IGLV2-14 protein - Homo sapiens (Human)

|                              |                         |   |        |        |    |                        |
|------------------------------|-------------------------|---|--------|--------|----|------------------------|
| <a href="#">A0A5C9_HUMAN</a> | R.SYSCQVTHEGSTVEK.T     | 2 | 4.8361 | 0.611  | 28 | <a href="#">A0A5C9</a> |
| <a href="#">A0A5C9_HUMAN</a> | K.YAASSYLSLTPEQWK.S     | 1 | 5.2299 | 0.6322 | 29 | <a href="#">A0A5C9</a> |
| <a href="#">A0A5C9_HUMAN</a> | K.AGVETTPSK.Q           | 1 | 3.3702 | 0.3627 | 17 | <a href="#">A0A5C9</a> |
| <a href="#">A0A5C9_HUMAN</a> | K.AAPSVTLFPPSSEELQANK.A | 4 | 4.1104 | 0.5395 | 18 | <a href="#">A0A5C9</a> |

Transthyretin precursor (Prealbumin) (TBPA) (TTR) (ATTR) - Homo sapiens (Human)

|                            |                           |   |        |        |  |                        |
|----------------------------|---------------------------|---|--------|--------|--|------------------------|
| <a href="#">TTHY_HUMAN</a> | R.KAADDTWEPFASGK.T        | 1 | 4.6936 | 0.6245 |  | <a href="#">P02766</a> |
| <a href="#">TTHY_HUMAN</a> | K.AAADTWEPFASGK.T         | 1 | 3.7585 | 0.6033 |  | <a href="#">P02766</a> |
| <a href="#">TTHY_HUMAN</a> | K.TSESGELHGLTTEEEFVEGIYI3 |   | 5.3731 | 0.6916 |  | <a href="#">P02766</a> |
| <a href="#">TTHY_HUMAN</a> | R.YTIAALLSPYSYSTTAVVTNPK  | 1 | 3.5282 | 0.4192 |  | <a href="#">P02766</a> |
| <a href="#">TTHY_HUMAN</a> | K.TSESGELHGLTTEEEFVEGIYI2 |   | 4.5014 | 0.5666 |  | <a href="#">P02766</a> |

7

Ig alpha-2 chain C region - Homo sapiens (Human)

|                             |                         |   |        |        |    |                        |
|-----------------------------|-------------------------|---|--------|--------|----|------------------------|
| <a href="#">IGHA2_HUMAN</a> | K.YLTWASR.Q             | 1 | 2.5058 | 0.3501 | 21 | <a href="#">P01877</a> |
| <a href="#">IGHA2_HUMAN</a> | R.QEPSQGTTFFAVTSILR.V   | 2 | 4.0791 | 0.6277 | 21 | <a href="#">P01877</a> |
| <a href="#">IGHA2_HUMAN</a> | K.KGDTFSCMVGHEALPLAFTQI | 1 | 4.466  | 0.3794 | 19 | <a href="#">P01877</a> |
| <a href="#">IGHA2_HUMAN</a> | K.SAVQGPPER.D           | 1 | 2.5867 | 0.3631 | 18 | <a href="#">P01877</a> |
| <a href="#">IGHA2_HUMAN</a> | R.WLQGSQELPR.E          | 2 | 3.3314 | 0.4244 | 23 | <a href="#">P01877</a> |

6

Serum paraoxonase/arylesterase 1 (EC 3.1.1.2) (EC 3.1.8.1) (PON 1) (Serum aryldialk

|                            |                          |   |        |        |  |                        |
|----------------------------|--------------------------|---|--------|--------|--|------------------------|
| <a href="#">PON1_HUMAN</a> | K.ILLMDLNEEDPTVLELGITGSK | 1 | 3.5078 | 0.5758 |  | <a href="#">P27169</a> |
| <a href="#">PON1_HUMAN</a> | R.IQNILTEEPK.V           | 1 | 3.8464 | 0.213  |  | <a href="#">P27169</a> |
| <a href="#">PON1_HUMAN</a> | K.IFFYDSENPASEVLR.I      | 3 | 5.8656 | 0.6284 |  | <a href="#">P27169</a> |
| <a href="#">PON1_HUMAN</a> | R.VVAEGDFDANGINISPDGK.Y  | 1 | 3.026  | 0.2793 |  | <a href="#">P27169</a> |

5

Complement C1s subcomponent precursor (EC 3.4.21.42) (C1 esterase) [Contains: Cc

|                           |                        |   |        |        |   |                        |
|---------------------------|------------------------|---|--------|--------|---|------------------------|
| <a href="#">C1S_HUMAN</a> | K.TMQENSTPRED.-        | 1 | 3.4685 | 0.4953 |   | <a href="#">P09871</a> |
| <a href="#">C1S_HUMAN</a> | R.TNFDNDIALVR.L        | 2 | 3.2065 | 0.3518 |   | <a href="#">P09871</a> |
| <a href="#">C1S_HUMAN</a> | R.SSNPHSPIVEEFQVPYNK.L | 1 | 4.1189 | 0.4624 | 1 | <a href="#">P09871</a> |
| <a href="#">C1S_HUMAN</a> | K.SDFSNEER.F           | 1 | 2.4732 | 0.3737 | 4 | <a href="#">P09871</a> |

Hypothetical protein - Homo sapiens (Human)

|                              |                        |   |        |        |    |                        |
|------------------------------|------------------------|---|--------|--------|----|------------------------|
| <a href="#">A0A5E5_HUMAN</a> | R.TVAAPSVFIFPPSDEQLK.S | 3 | 4.0315 | 0.481  | 21 | <a href="#">A0A5E5</a> |
| <a href="#">A0A5E5_HUMAN</a> | K.VDNALQSGNSQESVTEQDSK | 1 | 5.2453 | 0.6423 | 20 | <a href="#">A0A5E5</a> |
| <a href="#">A0A5E5_HUMAN</a> | K.DSTYSLSSTLTLK.A      | 1 | 2.7193 | 0.2932 | 21 | <a href="#">A0A5E5</a> |

Serum amyloid P-component precursor (SAP) (9.5S alpha-1-glycoprotein) [Contains: S

|                            |                      |   |        |        |  |                        |
|----------------------------|----------------------|---|--------|--------|--|------------------------|
| <a href="#">SAMP_HUMAN</a> | K.IVLGQEQDSYGGKFDR.S | 1 | 4.1137 | 0.5074 |  | <a href="#">P02743</a> |
| <a href="#">SAMP_HUMAN</a> | R.VGEYSLYIGR.H       | 1 | 3.1572 | 0.497  |  | <a href="#">P02743</a> |
| <a href="#">SAMP_HUMAN</a> | R.QGYFVEAQP.K        | 1 | 2.594  | 0.4894 |  | <a href="#">P02743</a> |
| <a href="#">SAMP_HUMAN</a> | R.AYSLFSYNTQGR.D     | 1 | 2.6535 | 0.5099 |  | <a href="#">P02743</a> |
| <a href="#">SAMP_HUMAN</a> | R.GYVIKPLVWV.-       | 1 | 2.4318 | 0.4151 |  | <a href="#">P02743</a> |

4

Alpha-1-antitrypsin precursor (Alpha-1 protease inhibitor) (Alpha-1-antiproteinase) - Ho

|                            |                        |   |        |        |   |                        |
|----------------------------|------------------------|---|--------|--------|---|------------------------|
| <a href="#">A1AT_HUMAN</a> | K.TDTSHHDDHPTFNK.I     | 1 | 3.4864 | 0.3271 |   | <a href="#">P01009</a> |
| <a href="#">A1AT_HUMAN</a> | K.ITPNLAEFASLYR.Q      | 1 | 3.3167 | 0.6353 |   | <a href="#">P01009</a> |
| <a href="#">A1AT_HUMAN</a> | K.VFNSGADLSGVTEEAPLK.L | 1 | 3.1252 | 0.3499 | 1 | <a href="#">P01009</a> |
| <a href="#">A1AT_HUMAN</a> | K.ELDRDTVFALVNYIFFK.G  | 1 | 3.4486 | 0.3319 |   | <a href="#">P01009</a> |

AMBIP protein precursor [Contains: Alpha-1-microglobulin (Protein HC) (Complex-formi

|                             |                         |   |        |        |  |                        |
|-----------------------------|-------------------------|---|--------|--------|--|------------------------|
| <a href="#">AMBIP_HUMAN</a> | K.KEDSCQLGYSAGPCMGMTS.F | 1 | 2.8148 | 0.371  |  | <a href="#">P02760</a> |
| <a href="#">AMBIP_HUMAN</a> | R.AFIQLWAFDAVK.G        | 1 | 2.6677 | 0.5306 |  | <a href="#">P02760</a> |
| <a href="#">AMBIP_HUMAN</a> | R.TVAACNLPIVR.G         | 2 | 3.0014 | 0.5124 |  | <a href="#">P02760</a> |

Haptoglobin-related protein precursor - Homo sapiens (Human)

|                            |                    |   |        |        |   |                        |
|----------------------------|--------------------|---|--------|--------|---|------------------------|
| <a href="#">HPTR_HUMAN</a> | R.LRTEGDGVYTLNDK.K | 1 | 2.7808 | 0.2445 | 2 | <a href="#">P00739</a> |
| <a href="#">HPTR_HUMAN</a> | R.ILGGHLDK.G       | 1 | 2.6734 | 0.2857 | 3 | <a href="#">P00739</a> |
| <a href="#">HPTR_HUMAN</a> | K.GSFPWQAK.M       | 2 | 2.7904 | 0.385  | 3 | <a href="#">P00739</a> |

Hypothetical protein DKFZp686O01196 - Homo sapiens (Human)

|                              |                      |   |        |        |    |                        |
|------------------------------|----------------------|---|--------|--------|----|------------------------|
| <a href="#">Q6N094_HUMAN</a> | R.VVSVLTVLHQDWLNGK.E | 1 | 3.4603 | 0.5173 | 25 | <a href="#">Q6N094</a> |
| <a href="#">Q6N094_HUMAN</a> | R.EPQVYTLPPSRDELTK.N | 1 | 3.7999 | 0.4731 | 15 | <a href="#">Q6N094</a> |
| <a href="#">Q6N094_HUMAN</a> | K.GPSVFPLAPSSK.S     | 1 | 2.8519 | 0.46   | 20 | <a href="#">Q6N094</a> |
| <a href="#">Q6N094_HUMAN</a> | K.FNWYVDGVEVHNAK.T   | 1 | 5.0571 | 0.5892 | 20 | <a href="#">Q6N094</a> |

IGHM protein - Homo sapiens (Human)

|                              |                         |   |        |        |   |                        |
|------------------------------|-------------------------|---|--------|--------|---|------------------------|
| <a href="#">Q6GMY2_HUMAN</a> | K.QVGSVTTDQVQAEAK.E     | 2 | 4.3392 | 0.4953 | 4 | <a href="#">Q6GMY2</a> |
| <a href="#">Q6GMY2_HUMAN</a> | K.YAATSQVLLPSKDVMQGTDEI | 1 | 6.3012 | 0.6623 | 3 | <a href="#">Q6GMY2</a> |
| <a href="#">Q6GMY2_HUMAN</a> | R.EGKQVGSVTTDQVQAEAK.I  | 1 | 3.729  | 0.0937 | 4 | <a href="#">Q6GMY2</a> |

Inter-alpha-trypsin inhibitor heavy chain H3 precursor (ITI heavy chain H3) (Inter-alpha-

|                            |                 |   |        |        |  |                        |
|----------------------------|-----------------|---|--------|--------|--|------------------------|
| <a href="#">ITI3_HUMAN</a> | R.LVDEDMNSFK.A  | 2 | 3.5178 | 0.5765 |  | <a href="#">Q06033</a> |
| <a href="#">ITI3_HUMAN</a> | R.DYIFGNYIER.L  | 1 | 3.2084 | 0.5288 |  | <a href="#">Q06033</a> |
| <a href="#">ITI3_HUMAN</a> | R.LVDEDM*NSFK.A | 1 | 3.0464 | 0.4253 |  | <a href="#">Q06033</a> |

Vitronectin precursor (Serum-spreading factor) (S-protein) (V75) [Contains: Vitronectin

|                            |                  |   |        |        |  |                        |
|----------------------------|------------------|---|--------|--------|--|------------------------|
| <a href="#">VTNC_HUMAN</a> | R.FEDGVLDPDYPR.N | 1 | 3.2864 | 0.4262 |  | <a href="#">P04004</a> |
| <a href="#">VTNC_HUMAN</a> | R.IYISGMAPR.P    | 1 | 3.1957 | 0.3745 |  | <a href="#">P04004</a> |

3

|                            |                       |   |        |        |  |                        |
|----------------------------|-----------------------|---|--------|--------|--|------------------------|
| <a href="#">VTNC_HUMAN</a> | R.DVWGIEGPIDAAFTR.I   | 1 | 4.2401 | 0.4257 |  | <a href="#">P04004</a> |
| <a href="#">VTNC_HUMAN</a> | R.DWHGVPGQVDAAM*AGR.I | 1 | 3.3588 | 0.1622 |  | <a href="#">P04004</a> |

Apolipoprotein A-II precursor (Apo-AII) (ApoA-II) [Contains: Apolipoprotein A-II(1-76)] -

|                             |                 |   |        |        |  |                        |
|-----------------------------|-----------------|---|--------|--------|--|------------------------|
| <a href="#">APOA2_HUMAN</a> | K.VKSPELQAEAK.S | 2 | 3.5731 | 0.3545 |  | <a href="#">P02652</a> |
| <a href="#">APOA2_HUMAN</a> | K.SKEQLTPLIK.K  | 1 | 3.1002 | 0.4085 |  | <a href="#">P02652</a> |

Apolipoprotein F precursor (Apo-F) (Lipid transfer inhibitor protein) (LTIP) - Homo sapiens

|                            |                    |   |        |        |  |                        |
|----------------------------|--------------------|---|--------|--------|--|------------------------|
| <a href="#">APOF_HUMAN</a> | R.SGVQQLIQYYQDQK.D | 2 | 4.5022 | 0.5114 |  | <a href="#">Q13790</a> |
| <a href="#">APOF_HUMAN</a> | K.SYDLDPGAGSLEI.-  | 1 | 2.6485 | 0.3479 |  | <a href="#">Q13790</a> |

Clusterin precursor (Complement-associated protein SP-40,40) (Complement cytolytic

|                            |                  |   |        |        |   |                        |
|----------------------------|------------------|---|--------|--------|---|------------------------|
| <a href="#">CLUS_HUMAN</a> | R.ASSIIDELFQDR.F | 1 | 3.7493 | 0.4862 | 1 | <a href="#">P10909</a> |
| <a href="#">CLUS_HUMAN</a> | K.FM*ETVAEK.A    | 1 | 2.5768 | 0.241  | 1 | <a href="#">P10909</a> |
| <a href="#">CLUS_HUMAN</a> | R.ELDESLQVAER.L  | 1 | 3.3064 | 0.354  | 1 | <a href="#">P10909</a> |

Complement C1r subcomponent precursor (EC 3.4.21.41) (Complement component 1, r

|                           |                         |   |        |        |  |                        |
|---------------------------|-------------------------|---|--------|--------|--|------------------------|
| <a href="#">C1R_HUMAN</a> | K.QRPPDLDTSSNAVDLLFFTDE | 1 | 4.3028 | 0.4447 |  | <a href="#">P00736</a> |
| <a href="#">C1R_HUMAN</a> | R.YTTTGMVNTYK.A         | 2 | 3.058  | 0.4901 |  | <a href="#">P00736</a> |

Complement component C9 precursor [Contains: Complement component C9a; Compl

|                           |                  |   |        |        |  |                        |
|---------------------------|------------------|---|--------|--------|--|------------------------|
| <a href="#">CO9_HUMAN</a> | R.VVEESELAR.T    | 1 | 3.1114 | 0.4767 |  | <a href="#">P02748</a> |
| <a href="#">CO9_HUMAN</a> | R.TEHYEEQIEAFK.S | 1 | 3.373  | 0.5047 |  | <a href="#">P02748</a> |
| <a href="#">CO9_HUMAN</a> | R.AIEDYINEFSVR.K | 1 | 3.9139 | 0.5553 |  | <a href="#">P02748</a> |

Hypothetical protein - Homo sapiens (Human)

|                              |                         |   |        |        |    |                        |
|------------------------------|-------------------------|---|--------|--------|----|------------------------|
| <a href="#">Q6P5S3_HUMAN</a> | K.ANPTVTLFPPSSEELQANK.A | 2 | 4.1542 | 0.5369 | 10 | <a href="#">Q6P5S3</a> |
| <a href="#">Q6P5S3_HUMAN</a> | K.AGVETTKPSK.Q          | 1 | 2.5983 | 0.2523 | 10 | <a href="#">Q6P5S3</a> |

IGHA1 protein - Homo sapiens (Human)

|                              |                     |   |        |        |    |                        |
|------------------------------|---------------------|---|--------|--------|----|------------------------|
| <a href="#">Q8N5K4_HUMAN</a> | K.TPLTATLSK.S       | 1 | 2.4973 | 0.4579 | 11 | <a href="#">Q8N5K4</a> |
| <a href="#">Q8N5K4_HUMAN</a> | K.GTTVTVSSASPTSPK.V | 1 | 2.9674 | 0.5291 | 1  | <a href="#">Q8N5K4</a> |
| <a href="#">Q8N5K4_HUMAN</a> | R.DASGVTFTWTPSSGK.S | 1 | 4.1428 | 0.5953 | 12 | <a href="#">Q8N5K4</a> |

2

Apolipoprotein E precursor (Apo-E) - Homo sapiens (Human)

|                            |                    |   |        |        |  |                        |
|----------------------------|--------------------|---|--------|--------|--|------------------------|
| <a href="#">APOE_HUMAN</a> | R.AATVGLAGQPLQER.A | 1 | 3.7601 | 0.4751 |  | <a href="#">P02649</a> |
| <a href="#">APOE_HUMAN</a> | R.LGPLVEQGR.V      | 1 | 2.5078 | 0.3433 |  | <a href="#">P02649</a> |

Apolipoprotein(a) precursor (EC 3.4.21.-) (Apo(a)) (Lp(a)) - Homo sapiens (Human)

|                            |                  |   |        |        |    |                        |
|----------------------------|------------------|---|--------|--------|----|------------------------|
| <a href="#">APOA_HUMAN</a> | R.GTYSTTVTGR.T   | 1 | 2.6927 | 0.4594 | 39 | <a href="#">P08519</a> |
| <a href="#">APOA_HUMAN</a> | R.TPENYPNAGLTR.N | 1 | 2.4386 | 0.1752 | 1  | <a href="#">P08519</a> |

Fibulin-1 precursor - Homo sapiens (Human)

|                             |               |   |        |        |  |                        |
|-----------------------------|---------------|---|--------|--------|--|------------------------|
| <a href="#">FBLN1_HUMAN</a> | K.TGYFDGISR.M | 1 | 3.0621 | 0.4106 |  | <a href="#">P23142</a> |
| <a href="#">FBLN1_HUMAN</a> | R.SAATLQQEK.T | 1 | 2.6468 | 0.3794 |  | <a href="#">P23142</a> |

Heparin cofactor 2 precursor (Heparin cofactor II) (HC-II) (Protease inhibitor leuserpin 2

|                            |               |   |        |        |  |                        |
|----------------------------|---------------|---|--------|--------|--|------------------------|
| <a href="#">HEP2_HUMAN</a> | K.NYNLVESLK.L | 1 | 2.4719 | 0.3412 |  | <a href="#">P05546</a> |
| <a href="#">HEP2_HUMAN</a> | R.SVNDLYIQK.Q | 1 | 3.0269 | 0.4432 |  | <a href="#">P05546</a> |

Histidine-rich glycoprotein precursor (Histidine-proline-rich glycoprotein) (HPRG) - Homo sapiens

|                           |                    |   |        |        |  |                        |
|---------------------------|--------------------|---|--------|--------|--|------------------------|
| <a href="#">HRG_HUMAN</a> | K.YKEENDDFASFR.V   | 1 | 3.7937 | 0.6083 |  | <a href="#">P04196</a> |
| <a href="#">HRG_HUMAN</a> | K.DSPVLIDFFEDTER.Y | 1 | 4.5195 | 0.575  |  | <a href="#">P04196</a> |

Ig kappa chain V-IV region precursor (Fragment) - Homo sapiens (Human)

|                             |                  |   |        |        |   |                        |
|-----------------------------|------------------|---|--------|--------|---|------------------------|
| <a href="#">KV401_HUMAN</a> | K.LLIYWASTR.E    | 1 | 3.3492 | 0.3688 | 4 | <a href="#">P06312</a> |
| <a href="#">KV401_HUMAN</a> | K.SSQSVLYSSNNK.N | 1 | 3.0441 | 0.3912 | 2 | <a href="#">P06312</a> |

Ig lambda chain V-III region LOI - Homo sapiens (Human)

|                             |                        |   |        |        |  |                        |
|-----------------------------|------------------------|---|--------|--------|--|------------------------|
| <a href="#">LV302_HUMAN</a> | -.YVLTQPPSVSVAPGETAR.L | 2 | 4.0006 | 0.4775 |  | <a href="#">P80748</a> |
|-----------------------------|------------------------|---|--------|--------|--|------------------------|

IGHG4 protein - Homo sapiens (Human)

|                              |                         |   |        |        |   |                        |
|------------------------------|-------------------------|---|--------|--------|---|------------------------|
| <a href="#">Q8TC63_HUMAN</a> | K.YGPPCPCSCPAEFLGGPSVFI | 1 | 4.0683 | 0.3936 | 1 | <a href="#">Q8TC63</a> |
|------------------------------|-------------------------|---|--------|--------|---|------------------------|

|                                                                                          |                                          |   |        |        |   |                        |
|------------------------------------------------------------------------------------------|------------------------------------------|---|--------|--------|---|------------------------|
| <a href="#">Q8TC63_HUMAN</a>                                                             | R.EPQVYTLPPSQEEMTK.N                     | 1 | 2.4362 | 0.2292 | 1 | <a href="#">Q8TC63</a> |
| Myosin-reactive immunoglobulin light chain variable region (Fragment) - Homo sapiens     |                                          |   |        |        |   |                        |
| <a href="#">Q9UL83_HUMAN</a>                                                             | -.EIVM* <a href="#">TQSPATLSVSPGER.A</a> | 1 | 3.955  | 0.4591 | 1 | <a href="#">Q9UL83</a> |
| <a href="#">Q9UL83_HUMAN</a>                                                             | -.EIVMTQSPATLSVSPGER.A                   | 1 | 4.8316 | 0.5908 | 1 | <a href="#">Q9UL83</a> |
| Prothrombin precursor (EC 3.4.21.5) (Coagulation factor II) [Contains: Activation peptid |                                          |   |        |        |   |                        |
| <a href="#">THRB_HUMAN</a>                                                               | R.TATSEYQTFNPR.T                         | 2 | 3.5803 | 0.5196 |   | <a href="#">P00734</a> |
| 26S proteasome non-ATPase regulatory subunit 14 (26S proteasome regulatory subun         |                                          |   |        |        |   |                        |
| <a href="#">PSDE_HUMAN</a>                                                               | K.EMLELAKNYNKAVEEEDK.M                   | 1 | 3.4661 | 0.2207 |   | <a href="#">Q00487</a> |
| Actin-related protein 2/3 complex subunit 1A (SOP2-like protein) - Homo sapiens (Hum     |                                          |   |        |        |   |                        |
| <a href="#">ARC1A_HUMAN</a>                                                              | R.DRTQIALSPNNHEVHIYK.K                   | 1 | 2.4562 | 0.0883 |   | <a href="#">Q92747</a> |
| Adenylate cyclase type 6 (EC 4.6.1.1) (Adenylate cyclase type VI) (ATP pyrophosphate     |                                          |   |        |        |   |                        |
| <a href="#">ADCY6_HUMAN</a>                                                              | R.FLLTFQREDLEKK.Y                        | 1 | 2.5032 | 0.1113 |   | <a href="#">Q43306</a> |
| Adipose differentiation-related protein - Homo sapiens (Human)                           |                                          |   |        |        |   |                        |
| <a href="#">Q5SYF3_HUMAN</a>                                                             | R.IEERLPILNQPSTQVSLGQKC.1                |   | 2.4897 | 0.0977 |   | <a href="#">Q5SYF3</a> |
| Alpha-1-acid glycoprotein 2 precursor (AGP 2) (Orosomuroid-2) (OMD 2) - Homo sapie       |                                          |   |        |        |   |                        |
| <a href="#">A1AG2_HUMAN</a>                                                              | R.SDVMYTDWK.K                            | 1 | 3.174  | 0.4515 |   | <a href="#">P19652</a> |
| Aminopeptidase O (EC 3.4.11.-) (AP-O) - Homo sapiens (Human)                             |                                          |   |        |        |   |                        |
| <a href="#">AMPO_HUMAN</a>                                                               | K.HYVLDLDVDFESQVIEGTIVLF.1               |   | 3.6182 | 0.1689 |   | <a href="#">Q8N6M6</a> |
| Angiotensinogen precursor [Contains: Angiotensin-1 (Angiotensin I) (Ang I); Angiotensi   |                                          |   |        |        |   |                        |
| <a href="#">ANGT_HUMAN</a>                                                               | R.ADSQAQLLLSTVGVFTAPGL.1                 |   | 5.2888 | 0.5924 |   | <a href="#">P01019</a> |
| Apolipoprotein C-III precursor (Apo-CIII) (ApoC-III) - Homo sapiens (Human)              |                                          |   |        |        |   |                        |
| <a href="#">APOC3_HUMAN</a>                                                              | K.DALSSVQESQVAQQAR.G                     | 1 | 4.9755 | 0.3963 |   | <a href="#">P02656</a> |
| Apolipoprotein D precursor (Apo-D) (ApoD) - Homo sapiens (Human)                         |                                          |   |        |        |   |                        |
| <a href="#">APOD_HUMAN</a>                                                               | R.NPNLPPETVDSLK.N                        | 1 | 2.4472 | 0.3612 |   | <a href="#">P05090</a> |
| Apolipoprotein-L1 precursor (Apolipoprotein L-I) (Apolipoprotein L) (ApoL-I) (Apo-L) (Ap |                                          |   |        |        |   |                        |
| <a href="#">APOL1_HUMAN</a>                                                              | R.VTEPISAESGEQVER.V                      | 1 | 4.3195 | 0.5684 |   | <a href="#">Q14791</a> |
| Basic helix-loop-helix domain containing, class B, 9 (P60-like protein) - Homo sapiens ( |                                          |   |        |        |   |                        |
| <a href="#">Q6PI77_HUMAN</a>                                                             | K.LLLNMSNPAAARDM*INM*K.1                 |   | 2.6218 | 0.0955 |   | <a href="#">Q6PI77</a> |
| Brefeldin A-inhibited guanine nucleotide-exchange protein 1 (Brefeldin A-inhibited GEP   |                                          |   |        |        |   |                        |
| <a href="#">BIG1_HUMAN</a>                                                               | K.QRRLLYNLEMEQMAK.T                      | 1 | 2.465  | 0.1352 | 1 | <a href="#">Q9Y6D6</a> |
| C4B1 (Complement component 4B) (Childo blood group) - Homo sapiens (Human)               |                                          |   |        |        |   |                        |
| <a href="#">Q6U2E9_HUMAN</a>                                                             | R.GSSTWLTAFVLK.V                         | 1 | 3.6371 | 0.4513 |   | <a href="#">Q6U2E9</a> |
| Casein kinase I isoform gamma-1 (EC 2.7.11.1) (CKI-gamma 1) - Homo sapiens (Hum          |                                          |   |        |        |   |                        |
| <a href="#">KC1G1_HUMAN</a>                                                              | K.RNTPIEALCENFPEEMATYLR.1                |   | 3.4684 | 0.3322 | 1 | <a href="#">Q9HCP0</a> |
| Catenin alpha-3 (Alpha T-catenin) (Cadherin-associated protein) - Homo sapiens (Hum      |                                          |   |        |        |   |                        |
| <a href="#">CTNA3_HUMAN</a>                                                              | K.M*ISESGSRMDVLAR.Q                      | 1 | 2.4713 | 0.1267 |   | <a href="#">Q9UI47</a> |
| CDNA FLJ13244 fis, clone OVARC1000679, highly similar to Homo sapiens myosin-IX:         |                                          |   |        |        |   |                        |
| <a href="#">Q9H8T5_HUMAN</a>                                                             | K.VFLDEYM*NEFKTSDCTATKV.1                |   | 3.2005 | 0.2713 |   | <a href="#">Q9H8T5</a> |
| CLIP-associating protein 2 (Cytoplasmic linker-associated protein 2) (hOrbit2) - Homo s  |                                          |   |        |        |   |                        |
| <a href="#">CLAP2_HUMAN</a>                                                              | K.VKVAILKYIETLAK.Q                       | 1 | 2.9489 | 0.3212 | 1 | <a href="#">Q75122</a> |
| Collagen type IX alpha 2 (Fragment) - Homo sapiens (Human)                               |                                          |   |        |        |   |                        |
| <a href="#">Q5QPF8_HUMAN</a>                                                             | -.SPFRGPPGAAGAR.R                        | 1 | 2.7687 | 0.2401 |   | <a href="#">Q5QPF8</a> |
| Contactin-1 precursor (Neural cell surface protein F3) (Glycoprotein gp135) - Homo sa    |                                          |   |        |        |   |                        |
| <a href="#">CNTN1_HUMAN</a>                                                              | R.WRKVLEPM*PSTAEISTSGAV.1                |   | 2.4518 | 0.2187 |   | <a href="#">Q12860</a> |
| Crumbs homolog 1 precursor - Homo sapiens (Human)                                        |                                          |   |        |        |   |                        |
| <a href="#">CRUM1_HUMAN</a>                                                              | K.IDWNHITLENISSGSSLNVK.A                 | 1 | 2.9722 | 0.1379 |   | <a href="#">P82279</a> |
| DNA ligase 4 (EC 6.5.1.1) (DNA ligase IV) (Polydeoxyribonucleotide synthase [ATP] 4)     |                                          |   |        |        |   |                        |
| <a href="#">DNL4_HUMAN</a>                                                               | K.NEGTRLAIKALELR.F                       | 1 | 3.0536 | 0.1861 |   | <a href="#">P49917</a> |

|                                                                                                            |                              |                           |   |        |        |    |                        |
|------------------------------------------------------------------------------------------------------------|------------------------------|---------------------------|---|--------|--------|----|------------------------|
| Eomesodermin homolog - Homo sapiens (Human)                                                                | <a href="#">EOMES_HUMAN</a>  | R.RLSPSNSSNENSPSIK.C      | 1 | 2.428  | 0.1136 |    | <a href="#">Q95936</a> |
| ETS-related transcription factor Elf-1 (E74-like factor 1) - Homo sapiens (Human)                          | <a href="#">ELF1_HUMAN</a>   | -M*AAVVQQNDLVFEFASNVM*1   | 1 | 2.4511 | 0.1836 | 2  | <a href="#">P32519</a> |
| Fetal beta-MHC binding factor - Homo sapiens (Human)                                                       | <a href="#">Q14297_HUMAN</a> | K.KRIIYDSDSESEETVQVK.N    | 1 | 2.5178 | 0.2887 |    | <a href="#">Q14297</a> |
| Glutamate dehydrogenase 2, mitochondrial precursor (EC 1.4.1.3) (GDH) - Homo sapiens (Human)               | <a href="#">DHE4_HUMAN</a>   | R.SARQIM*HTAMKYNLGLDLR.11 | 1 | 3.3058 | 0.1232 |    | <a href="#">P49448</a> |
| Haptoglobin precursor [Contains: Haptoglobin alpha chain; Haptoglobin beta chain] - Homo sapiens (Human)   | <a href="#">HPT_HUMAN</a>    | R.VGYVSGWGR.N             | 1 | 3.1823 | 0.413  | 2  | <a href="#">P00738</a> |
| Hypothetical protein DKFZp686E23209 - Homo sapiens (Human)                                                 | <a href="#">Q68CN4_HUMAN</a> | K.NQVSLTCLVK.G            | 1 | 2.6481 | 0.4324 | 30 | <a href="#">Q68CN4</a> |
| Hypothetical protein DKFZp686I15212 - Homo sapiens (Human)                                                 | <a href="#">Q6N030_HUMAN</a> | K.WYVDGVEVHNAK.T          | 1 | 2.6759 | 0.4194 | 4  | <a href="#">Q6N030</a> |
| Hypothetical protein FL25415 - Homo sapiens (Human)                                                        | <a href="#">Q7Z5J8_HUMAN</a> | R.AM*KCKSIPFGMK.S         | 1 | 2.649  | 0.295  |    | <a href="#">Q7Z5J8</a> |
| Hypothetical protein pp12301 - Homo sapiens (Human)                                                        | <a href="#">Q8WYX2_HUMAN</a> | R.AEVGGWLEPR.S            | 1 | 2.4279 | 0.0925 |    | <a href="#">Q8WYX2</a> |
| Ig heavy chain V-III region JON - Homo sapiens (Human)                                                     | <a href="#">HV319_HUMAN</a>  | -.DVQLVESGGGLVKGPGGSLR.L  | 1 | 2.636  | 0.149  |    | <a href="#">P01780</a> |
| Ig heavy chain V-III region TIL - Homo sapiens (Human)                                                     | <a href="#">HV304_HUMAN</a>  | -.EVQLLESGGGLVQPGGSLR.L   | 1 | 4.8803 | 0.3725 | 5  | <a href="#">P01765</a> |
| Ig kappa chain V-III region SIE - Homo sapiens (Human)                                                     | <a href="#">KV302_HUMAN</a>  | R.FSGSGSGTDFTLTISR.L      | 1 | 4.0281 | 0.6388 | 12 | <a href="#">P01620</a> |
| Ig kappa chain V-IV region Len - Homo sapiens (Human)                                                      | <a href="#">KV402_HUMAN</a>  | -.DIVMTQSPDSLAVSLGER.A    | 1 | 2.9568 | 0.3584 |    | <a href="#">P01625</a> |
| Ig lambda chain V-III region SH - Homo sapiens (Human)                                                     | <a href="#">LV301_HUMAN</a>  | -.SELTQDPAVSVALGQTVR.I    | 1 | 2.9339 | 0.275  |    | <a href="#">P01714</a> |
| IGHG1 protein - Homo sapiens (Human)                                                                       | <a href="#">Q6PJ95_HUMAN</a> | R.GTLVTVSSASTK.G          | 1 | 2.9184 | 0.2997 |    | <a href="#">Q6PJ95</a> |
| Immunoglobulin J chain - Homo sapiens (Human)                                                              | <a href="#">IGJ_HUMAN</a>    | R.SSEDPNEDIVER.N          | 1 | 3.0961 | 0.3203 |    | <a href="#">P01591</a> |
| Integrin alpha-E precursor (Mucosal lymphocyte 1 antigen) (HML-1 antigen) (Integrin alpha-E)               | <a href="#">ITAE_HUMAN</a>   | R.FAIGVGEEFKSAR.T         | 1 | 2.5436 | 0.2094 |    | <a href="#">P38570</a> |
| Kinesin heavy chain isoform 5A (Neuronal kinesin heavy chain) (NKHC) (Kinesin heavy chain 5A)              | <a href="#">KIF5A_HUMAN</a>  | K.LEAELSRWR.N             | 1 | 2.4136 | 0.146  |    | <a href="#">Q12840</a> |
| KNG1 protein - Homo sapiens (Human)                                                                        | <a href="#">Q05CF8_HUMAN</a> | K.AGAEPASEREVS.-          | 1 | 2.9131 | 0.4265 |    | <a href="#">Q05CF8</a> |
| Leucine-rich repeat and fibronectin type III domain-containing protein 1 (Fragment) - Homo sapiens (Human) | <a href="#">Q9P244_HUMAN</a> | R.PQQRYSFDGDYGALFQSHSY.1  | 1 | 3.2362 | 0.114  |    | <a href="#">Q9P244</a> |
| Low-density lipoprotein receptor-related protein 2 precursor (Megalin) (Glycoprotein 330)                  | <a href="#">LRP2_HUMAN</a>   | R.CDRHNDCGDYSDER.G        | 1 | 2.5889 | 0.2861 |    | <a href="#">P98164</a> |
| Lysosomal-trafficking regulator (Beige homolog) - Homo sapiens (Human)                                     | <a href="#">LYST_HUMAN</a>   | K.DKAASESIR.V             | 1 | 2.1447 | 0.3083 |    | <a href="#">Q99698</a> |
| MRNA clone with similarity to L-glycerol-3-phosphate:NAD oxidoreductase and albumin                        | <a href="#">Q13138_HUMAN</a> | -.M*SVLM*GANIASEVADEK.F   | 1 | 2.6931 | 0.0971 |    | <a href="#">Q13138</a> |
| Myosin-reactive immunoglobulin heavy chain variable region (Fragment) - Homo sapiens (Human)               | <a href="#">Q9UL94_HUMAN</a> | -.EVQLVESGAEVK.K          | 1 | 4.1798 | 0.4812 | 2  | <a href="#">Q9UL94</a> |
| Myotubularin-related protein 4 (FYVE domain-containing dual specificity protein phosphatase 4)             |                              |                           |   |        |        |    |                        |

|                                                                                           |                          |   |        |        |                          |
|-------------------------------------------------------------------------------------------|--------------------------|---|--------|--------|--------------------------|
| <a href="#">Q8IV27_HUMAN</a>                                                              | R.SM*DDLLSACDTSSPLTR.T   | 1 | 2.5071 | 0.1381 | <a href="#">Q8IV27</a>   |
| N-acetylglutamate synthase, mitochondrial precursor (EC 2.3.1.1) (Amino-acid acetyltra    |                          |   |        |        |                          |
| <a href="#">NAGS_HUMAN</a>                                                                | R.SLVQRDIQAFLNQCASPGE/   | 1 | 2.4605 | 0.1971 | <a href="#">Q8N159</a>   |
| NADH dehydrogenase [ubiquinone] iron-sulfur protein 2, mitochondrial precursor (EC 1      |                          |   |        |        |                          |
| <a href="#">NDUS2_HUMAN</a>                                                               | R.AEM*KTSM*ESLIHFFK.L    | 1 | 3.315  | 0.1556 | <a href="#">Q75306</a>   |
| Nesprin-2 (Nuclear envelope spectrin repeat protein 2) (Syne-2) (Synaptic nuclear enve    |                          |   |        |        |                          |
| <a href="#">SYNE2_HUMAN</a>                                                               | R.KIQHLEQLLESITESENK.I   | 1 | 2.8835 | 0.1425 | <a href="#">Q8WXH0</a>   |
| Non-structural maintenance of chromosomes element 1 homolog (Non-SMC element 1            |                          |   |        |        |                          |
| <a href="#">NSE1_HUMAN</a>                                                                | K.FVQNKWLIK.E            | 1 | 2.4635 | 0.1302 | <a href="#">Q8WV22</a>   |
| Novel protein similar to hemicentin (LOC392395) (Fragment) - Homo sapiens (Human)         |                          |   |        |        |                          |
| <a href="#">A2A3K3_HUMAN</a>                                                              | R.ASVWLLVR.E             | 1 | 2.4768 | 0.1172 | <a href="#">A2A3K3</a>   |
| P2X purinoceptor 6 (ATP receptor) (P2X6) (Purinergic receptor) (P2XM) (Purinergic rec     |                          |   |        |        |                          |
| <a href="#">P2RX6_HUMAN</a>                                                               | R.LLQFGIVVYVVGWALLAK.K   | 1 | 3.2257 | 0.2436 | <a href="#">Q15547</a>   |
| PHACTR4 protein - Homo sapiens (Human)                                                    |                          |   |        |        |                          |
| <a href="#">Q6NUN6_HUMAN</a>                                                              | K.LNHRPSEPELNLSWPCKSK    | 1 | 3.4059 | 0.1456 | 2 <a href="#">Q6NUN6</a> |
| Protein Z-dependent protease inhibitor precursor (PZ-dependent protease inhibitor) (PZ    |                          |   |        |        |                          |
| <a href="#">ZPI_HUMAN</a>                                                                 | R.IFSPFADLSELSATGR.N     | 1 | 3.2171 | 0.596  | <a href="#">Q9UK55</a>   |
| Pyruvate kinase isozymes M1/M2 (EC 2.7.1.40) (Pyruvate kinase muscle isozyme) (Pyr        |                          |   |        |        |                          |
| <a href="#">KPYM_HUMAN</a>                                                                | K.ITLDNAYMEKCDENILWLDYKI | 1 | 3.6846 | 0.2175 | 1 <a href="#">P14618</a> |
| RcADH5 (Fragment) - Homo sapiens (Human)                                                  |                          |   |        |        |                          |
| <a href="#">Q2VIM7_HUMAN</a>                                                              | K.FARAKEFGATECINPQGFSK.I | 1 | 3.2711 | 0.1739 | <a href="#">Q2VIM7</a>   |
| Receptor-type tyrosine-protein phosphatase kappa precursor (EC 3.1.3.48) (Protein-tyr     |                          |   |        |        |                          |
| <a href="#">PTPRK_HUMAN</a>                                                               | R.KGYNIYFQAM*SSVEKETK.T  | 1 | 2.4473 | 0.1347 | 4 <a href="#">Q15262</a> |
| Rheumatoid factor D5 light chain (Fragment) - Homo sapiens (Human)                        |                          |   |        |        |                          |
| <a href="#">A0N5G5_HUMAN</a>                                                              | -.EIVLTQSPATLSLSPGER.A   | 1 | 3.9939 | 0.5844 | <a href="#">A0N5G5</a>   |
| Rho GTPase-activating protein 29 (PTPL1-associated Rho GTPase-activating protein 1        |                          |   |        |        |                          |
| <a href="#">O15463_HUMAN</a>                                                              | K.MNSKNLGVIFGPSLIR.P     | 1 | 3.3165 | 0.1942 | <a href="#">O15463</a>   |
| Ribosomal RNA upstream binding transcription factor (Fragment) - Homo sapiens (Hun        |                          |   |        |        |                          |
| <a href="#">O00164_HUMAN</a>                                                              | K.TTTRM*TMR.M            | 1 | 2.638  | 0.2708 | <a href="#">O00164</a>   |
| RNA polymerase-associated protein RTF1 homolog - Homo sapiens (Human)                     |                          |   |        |        |                          |
| <a href="#">RTF1_HUMAN</a>                                                                | K.DKDLNSKSASDLSEDLFK.V   | 1 | 2.7092 | 0.1737 | <a href="#">Q92541</a>   |
| Selenoprotein P precursor (SeP) - Homo sapiens (Human)                                    |                          |   |        |        |                          |
| <a href="#">SEPP1_HUMAN</a>                                                               | K.LPTDSELAPR.S           | 1 | 2.565  | 0.4091 | <a href="#">P49908</a>   |
| Short transient receptor potential channel 3 (TrpC3) (Htrp-3) (Htrp3) - Homo sapiens (H   |                          |   |        |        |                          |
| <a href="#">TRPC3_HUMAN</a>                                                               | K.QDISSLRYELLEDK.S       | 1 | 2.4231 | 0.0937 | 1 <a href="#">Q13507</a> |
| Solute carrier family 22 member 11 (Organic anion transporter 4) - Homo sapiens (Hun      |                          |   |        |        |                          |
| <a href="#">OAT4_HUMAN</a>                                                                | R.INGHKEAKNLTIEVLMSSVK.E | 1 | 2.6246 | 0.1469 | 1 <a href="#">Q9NSA0</a> |
| Succinyl-CoA ligase [GDP-forming] beta-chain, mitochondrial precursor (EC 6.2.1.4) (S     |                          |   |        |        |                          |
| <a href="#">SUCB2_HUMAN</a>                                                               | K.VPLVVRLEGTVQEAQK.I     | 1 | 2.5292 | 0.1748 | 1 <a href="#">Q96199</a> |
| Synaptotagmin-like protein 5 - Homo sapiens (Human)                                       |                          |   |        |        |                          |
| <a href="#">SYTL5_HUMAN</a>                                                               | -.M*SKNSEFINLSFLLDHEK.E  | 1 | 2.5595 | 0.233  | <a href="#">Q8TDW5</a>   |
| Transcription elongation factor B polypeptide 1 (RNA polymerase II transcription factor   |                          |   |        |        |                          |
| <a href="#">ELOC_HUMAN</a>                                                                | K.AMLSGPGQFAENETNEVNFR   | 1 | 2.4776 | 0.1316 | <a href="#">Q15369</a>   |
| Transcription factor-like 5 protein (Cha transcription factor) (HPV-16 E2-binding protein |                          |   |        |        |                          |
| <a href="#">TCFL5_HUMAN</a>                                                               | R.MMLLSEAGAAEKTSGGGDG/   | 1 | 3.2678 | 0.1332 | 1 <a href="#">Q9UL49</a> |
| Tumor protein p73 (p53-like transcription factor) (p53-related protein) - Homo sapiens (  |                          |   |        |        |                          |
| <a href="#">P73_HUMAN</a>                                                                 | R.QRVM*EAVHFRVR.H        | 1 | 2.4785 | 0.138  | <a href="#">O15350</a>   |
| Uncharacterized protein C12orf52 (Fragment) - Homo sapiens (Human)                        |                          |   |        |        |                          |
| <a href="#">Q53GM3_HUMAN</a>                                                              | R.AIHPAGPSKTEPGAADSQK.   | 1 | 2.7129 | 0.0949 | <a href="#">Q53GM3</a>   |

|                                                                                           |                              |                         |   |        |        |    |                        |
|-------------------------------------------------------------------------------------------|------------------------------|-------------------------|---|--------|--------|----|------------------------|
| Uncharacterized protein C9orf144 - Homo sapiens (Human)                                   | <a href="#">Q6ZU69_HUMAN</a> | K.DPFLFNELSFQQLPK.T     | 1 | 3.3084 | 0.1028 |    | <a href="#">Q6ZU69</a> |
| Uracil-DNA glycosylase (EC 3.2.2.-) (UDG) - Homo sapiens (Human)                          | <a href="#">UNG_HUMAN</a>    | -M*IGQKTLYSFFSPSPAR.K   | 1 | 2.5035 | 0.1067 |    | <a href="#">P13051</a> |
| V5-6 protein (Fragment) - Homo sapiens (Human)                                            | <a href="#">Q5NV92_HUMAN</a> | R.FSGSSSGAER.Y          | 1 | 2.5372 | 0.3321 | 1  | <a href="#">Q5NV92</a> |
| VH1 protein precursor (Fragment) - Homo sapiens (Human)                                   | <a href="#">O95978_HUMAN</a> | K.GPSVFPLAPCSR.S        | 1 | 2.7329 | 0.3025 | 11 | <a href="#">O95978</a> |
| von Willebrand factor precursor (vWF) [Contains: von Willebrand antigen 2 (von Willeb     | <a href="#">VWF_HUMAN</a>    | K.GLYLETEAGYYK.L        | 1 | 2.5119 | 0.4371 | 1  | <a href="#">P04275</a> |
| Zinc finger and BTB domain-containing protein 22 (Zinc finger protein 297) (Protein BIL   | <a href="#">ZBT22_HUMAN</a>  | R.HRLGGVGAVPGPTPTGPSL.1 | 1 | 2.4507 | 0.0988 | 1  | <a href="#">O15209</a> |
| Zinc finger CCHC domain-containing protein 11 - Homo sapiens (Human)                      | <a href="#">ZCH11_HUMAN</a>  | R.M*DDFQLKGIVEEKFK.V    | 1 | 2.4006 | 0.3023 | 1  | <a href="#">Q5TAX3</a> |
| Zinc finger protein 638 (Nuclear protein 220) (Zinc-finger matrin-like protein) (Cutaneou | <a href="#">ZN638_HUMAN</a>  | R.DITKQSQETEARSIM*K.R   | 1 | 2.6796 | 0.1963 | 1  | <a href="#">Q14966</a> |
| Zinc finger, MYM-type 4 (Fragment) - Homo sapiens (Human)                                 | <a href="#">Q5T5E1_HUMAN</a> | K.PIVTINTNSISTK.C       | 1 | 2.6026 | 0.1306 | 1  | <a href="#">Q5T5E1</a> |

93

39

|                                                                                           |                             |                            |   |        |        |   |                        |
|-------------------------------------------------------------------------------------------|-----------------------------|----------------------------|---|--------|--------|---|------------------------|
| Inter-alpha-trypsin inhibitor heavy chain H2 precursor (ITI heavy chain H2) (Inter-alpha- | <a href="#">ITIH2_HUMAN</a> | R.NDLISATKTQVADAKR.Y       | 1 | 3.5041 | 0.4864 | 1 | <a href="#">P19823</a> |
|                                                                                           | <a href="#">ITIH2_HUMAN</a> | R.MLADAPPQDPSCCSGALYYG.2   | 2 | 3.8781 | 0.5745 | 1 | <a href="#">P19823</a> |
|                                                                                           | <a href="#">ITIH2_HUMAN</a> | R.FLHVPDTFEGHFDGVPVISK.C.1 | 1 | 3.2089 | 0.4492 | 2 | <a href="#">P19823</a> |
|                                                                                           | <a href="#">ITIH2_HUMAN</a> | R.SSALDM*ENFR.T            | 1 | 2.6144 | 0.2459 | 2 | <a href="#">P19823</a> |
|                                                                                           | <a href="#">ITIH2_HUMAN</a> | R.MATTMQSK.V               | 2 | 2.7744 | 0.5394 | 2 | <a href="#">P19823</a> |
|                                                                                           | <a href="#">ITIH2_HUMAN</a> | R.SSALDM*ENFRTEVNVLPGAK.1  | 1 | 4.0958 | 0.3378 | 2 | <a href="#">P19823</a> |
|                                                                                           | <a href="#">ITIH2_HUMAN</a> | R.SSIKEKTVGR.A             | 1 | 2.5765 | 0.2159 | 2 | <a href="#">P19823</a> |
|                                                                                           | <a href="#">ITIH2_HUMAN</a> | R.TEVNVLPGAK.V             | 2 | 2.9321 | 0.5081 | 2 | <a href="#">P19823</a> |
|                                                                                           | <a href="#">ITIH2_HUMAN</a> | R.TWRNDLISATKTQVADAKR.1    | 1 | 4.6325 | 0.5939 | 1 | <a href="#">P19823</a> |
|                                                                                           | <a href="#">ITIH2_HUMAN</a> | R.YIEKIQPSGGTNINEALLR.A.1  | 1 | 5.4076 | 0.4787 | 1 | <a href="#">P19823</a> |
|                                                                                           | <a href="#">ITIH2_HUMAN</a> | K.VVNNSPQPQNVVFDVQIPK.G.3  | 3 | 5.5189 | 0.5838 | 2 | <a href="#">P19823</a> |
|                                                                                           | <a href="#">ITIH2_HUMAN</a> | K.IQPSGGTNINEALLR.A.1      | 1 | 2.7373 | 0.474  | 1 | <a href="#">P19823</a> |
|                                                                                           | <a href="#">ITIH2_HUMAN</a> | K.AGELEVFNGYFVHFFAPDNLI.2  | 2 | 6.0186 | 0.6118 | 1 | <a href="#">P19823</a> |
|                                                                                           | <a href="#">ITIH2_HUMAN</a> | K.AHVSFKPTVAQQR.I.2        | 2 | 3.6466 | 0.653  | 2 | <a href="#">P19823</a> |
|                                                                                           | <a href="#">ITIH2_HUMAN</a> | K.FYNQVSTPLLR.N.3          | 3 | 3.3421 | 0.4424 | 1 | <a href="#">P19823</a> |
|                                                                                           | <a href="#">ITIH2_HUMAN</a> | K.HADPDFTR.K.1             | 1 | 2.5453 | 0.2499 | 1 | <a href="#">P19823</a> |
|                                                                                           | <a href="#">ITIH2_HUMAN</a> | R.IYGNQDTSSQLKK.F.1        | 1 | 3.7726 | 0.4463 | 1 | <a href="#">P19823</a> |
|                                                                                           | <a href="#">ITIH2_HUMAN</a> | K.VQFELHYQEVK.W.1          | 1 | 3.7944 | 0.3312 | 2 | <a href="#">P19823</a> |
|                                                                                           | <a href="#">ITIH2_HUMAN</a> | R.MATTM*IQSK.V.1           | 1 | 2.9539 | 0.4924 | 2 | <a href="#">P19823</a> |
|                                                                                           | <a href="#">ITIH2_HUMAN</a> | R.AEDHFSVIDFNQNR.T.3       | 3 | 4.734  | 0.5106 | 1 | <a href="#">P19823</a> |
|                                                                                           | <a href="#">ITIH2_HUMAN</a> | R.ETAVDGELVVLYDVK.R.1      | 1 | 3.7825 | 0.5206 | 1 | <a href="#">P19823</a> |
|                                                                                           | <a href="#">ITIH2_HUMAN</a> | R.IYGNQDTSSQLK.K.1         | 1 | 3.5248 | 0.3853 | 1 | <a href="#">P19823</a> |
|                                                                                           | <a href="#">ITIH2_HUMAN</a> | R.IYLQPGRLAK.H.1           | 1 | 2.4259 | 0.1464 | 2 | <a href="#">P19823</a> |
|                                                                                           | <a href="#">ITIH2_HUMAN</a> | R.LSNENHGIAQR.I.1          | 1 | 3.8566 | 0.4369 | 1 | <a href="#">P19823</a> |
|                                                                                           | <a href="#">ITIH2_HUMAN</a> | R.M*ATTM*IQSK.V.2          | 2 | 2.7928 | 0.46   | 2 | <a href="#">P19823</a> |
|                                                                                           | <a href="#">ITIH2_HUMAN</a> | K.KFYNQVSTPLLR.N.1         | 1 | 3.3843 | 0.5348 | 1 | <a href="#">P19823</a> |
|                                                                                           | <a href="#">ITIH2_HUMAN</a> | K.TVGRALYAQAR.A.1          | 1 | 2.7259 | 0.2828 | 2 | <a href="#">P19823</a> |

36

Ceruloplasmin precursor (EC 1.16.3.1) (Ferroxidase) - Homo sapiens (Human)

|                            |                           |   |        |        |                        |
|----------------------------|---------------------------|---|--------|--------|------------------------|
| <a href="#">CERU_HUMAN</a> | R.GVYSSDVFDFIFPGTYQTLEM*  | 1 | 3.22   | 0.5322 | <a href="#">P00450</a> |
| <a href="#">CERU_HUMAN</a> | K.MYYSAVDPTK.D            | 1 | 3.2211 | 0.542  | <a href="#">P00450</a> |
| <a href="#">CERU_HUMAN</a> | K.MYYSAVDPTKDIFTGLIGPM*†  | 1 | 4.0388 | 0.5273 | <a href="#">P00450</a> |
| <a href="#">CERU_HUMAN</a> | K.NNEGTYYSPTYNPQSR.S      | 1 | 4.0667 | 0.5753 | <a href="#">P00450</a> |
| <a href="#">CERU_HUMAN</a> | K.VDKDNEDFQESNR.M         | 1 | 3.3991 | 0.2614 | <a href="#">P00450</a> |
| <a href="#">CERU_HUMAN</a> | K.VNKDDEEFIESNK.M         | 1 | 4.416  | 0.3636 | <a href="#">P00450</a> |
| <a href="#">CERU_HUMAN</a> | K.WYLFMGNEVDVHAAFFHG      | 1 | 5.5071 | 0.5384 | <a href="#">P00450</a> |
| <a href="#">CERU_HUMAN</a> | K.M*YYSAVDPTKDIFTGLIGPM†  | 1 | 4.776  | 0.5259 | <a href="#">P00450</a> |
| <a href="#">CERU_HUMAN</a> | R.FNKNNEGTYYSPTYNPQSR.‡   | 1 | 4.6774 | 0.546  | <a href="#">P00450</a> |
| <a href="#">CERU_HUMAN</a> | R.EYTDASFTNR.K            | 1 | 2.9746 | 0.5085 | <a href="#">P00450</a> |
| <a href="#">CERU_HUMAN</a> | R.GVYSSDVFDFIFPGTYQTLEMF  | 2 | 5.0619 | 0.6325 | <a href="#">P00450</a> |
| <a href="#">CERU_HUMAN</a> | R.HYYIAAEEIIWNYAPSGIDIFT† | 2 | 6.1043 | 0.538  | <a href="#">P00450</a> |
| <a href="#">CERU_HUMAN</a> | R.IYHSHIDAPK.D            | 1 | 2.4952 | 0.3266 | <a href="#">P00450</a> |
| <a href="#">CERU_HUMAN</a> | R.M*FTTAPDQVDEDEDFQESI    | 1 | 3.6744 | 0.5139 | <a href="#">P00450</a> |
| <a href="#">CERU_HUMAN</a> | R.MFTTAPDQVDEDEDFQESN     | 1 | 3.6808 | 0.5136 | <a href="#">P00450</a> |
| <a href="#">CERU_HUMAN</a> | R.QSEDSTFYLGERT.T         | 1 | 3.1407 | 0.3037 | <a href="#">P00450</a> |
| <a href="#">CERU_HUMAN</a> | R.RQSEDSTFYLGERT.T        | 1 | 3.9411 | 0.4426 | <a href="#">P00450</a> |
| <a href="#">CERU_HUMAN</a> | R.TTIEKPVWLGLGFLPIIK.A    | 1 | 3.5758 | 0.3707 | <a href="#">P00450</a> |
| <a href="#">CERU_HUMAN</a> | K.ALYLQYTDETFR.T          | 1 | 3.8859 | 0.4773 | <a href="#">P00450</a> |
| <a href="#">CERU_HUMAN</a> | R.GPEEEHLGILGPVIWAIEVGD   | 1 | 6.2697 | 0.3884 | <a href="#">P00450</a> |
| <a href="#">CERU_HUMAN</a> | K.LISVDTEHSNIYLQNGPDR.I   | 1 | 3.9109 | 0.4612 | <a href="#">P00450</a> |
| <a href="#">CERU_HUMAN</a> | K.HYYIGIETTWDYASDHGEK.K   | 1 | 6.3779 | 0.6495 | <a href="#">P00450</a> |
| <a href="#">CERU_HUMAN</a> | K.GAYPLSIEPIGVR.F         | 1 | 2.7902 | 0.48   | <a href="#">P00450</a> |
| <a href="#">CERU_HUMAN</a> | K.DVDKEFYLFPTVFDENESLLLI  | 1 | 4.5011 | 0.426  | <a href="#">P00450</a> |
| <a href="#">CERU_HUMAN</a> | K.DNEDFQESNR.M            | 1 | 3.2689 | 0.3686 | <a href="#">P00450</a> |
| <a href="#">CERU_HUMAN</a> | K.DIFTGLIGPMK.I           | 1 | 3.0047 | 0.3554 | <a href="#">P00450</a> |
| <a href="#">CERU_HUMAN</a> | K.DIFTGLIGPM*K.I          | 1 | 2.4105 | 0.1466 | <a href="#">P00450</a> |
| <a href="#">CERU_HUMAN</a> | K.DDEEFIESNK.M            | 1 | 3.2952 | 0.439  | <a href="#">P00450</a> |
| <a href="#">CERU_HUMAN</a> | K.M*YYSAVDPTK.D           | 1 | 2.5848 | 0.3368 | <a href="#">P00450</a> |
| <a href="#">CERU_HUMAN</a> | K.AETGDKVYVHLK.N          | 1 | 3.2214 | 0.3758 | <a href="#">P00450</a> |
| <a href="#">CERU_HUMAN</a> | K.AEEHLGILGPQLHADVGDK.†   | 1 | 4.1972 | 0.5292 | <a href="#">P00450</a> |
| <a href="#">CERU_HUMAN</a> | K.M*YYSAVDPTKDIFTGLIGPM*  | 1 | 3.9448 | 0.4931 | <a href="#">P00450</a> |
| <a href="#">CERU_HUMAN</a> | K.DIASGLIGPLICK.K         | 2 | 4.3401 | 0.6494 | <a href="#">P00450</a> |

28

Complement C3 precursor [Contains: Complement C3 beta chain; Complement C3 alpha]

|                           |                          |   |        |        |                        |
|---------------------------|--------------------------|---|--------|--------|------------------------|
| <a href="#">CO3_HUMAN</a> | R.ILLQGTPVAQM*TEDAVDAER  | 1 | 2.9235 | 0.4754 | <a href="#">P01024</a> |
| <a href="#">CO3_HUMAN</a> | K.RIPIEDGSGEVVLSRK.V     | 1 | 4.5227 | 0.5182 | <a href="#">P01024</a> |
| <a href="#">CO3_HUMAN</a> | K.QELSEAEQATR.T          | 1 | 2.7298 | 0.3657 | <a href="#">P01024</a> |
| <a href="#">CO3_HUMAN</a> | K.QLYNVEATSYALLALLQLK.D  | 1 | 5.5373 | 0.5384 | <a href="#">P01024</a> |
| <a href="#">CO3_HUMAN</a> | R.SNLDEDIAEENIVSR.S      | 2 | 5.1859 | 0.5862 | <a href="#">P01024</a> |
| <a href="#">CO3_HUMAN</a> | R.SEETKENEGFTVTAEGK.G    | 1 | 4.7076 | 0.4226 | <a href="#">P01024</a> |
| <a href="#">CO3_HUMAN</a> | R.TKKQELSEAEQATR.T       | 1 | 4.7115 | 0.5599 | <a href="#">P01024</a> |
| <a href="#">CO3_HUMAN</a> | R.ILLQGTPVAQMTEDAVDAER.‡ | 2 | 5.7638 | 0.6789 | <a href="#">P01024</a> |
| <a href="#">CO3_HUMAN</a> | K.SGSDEVQVGQQR.T         | 1 | 4.19   | 0.3442 | <a href="#">P01024</a> |
| <a href="#">CO3_HUMAN</a> | R.HQQTVTIPPK.S           | 1 | 2.5841 | 0.3512 | <a href="#">P01024</a> |
| <a href="#">CO3_HUMAN</a> | K.AGDFLEANYMNLQR.S       | 3 | 4.3313 | 0.4882 | <a href="#">P01024</a> |
| <a href="#">CO3_HUMAN</a> | K.EDIPPADLSQVPDTESETR.‡  | 2 | 3.7817 | 0.557  | <a href="#">P01024</a> |
| <a href="#">CO3_HUMAN</a> | K.EYVLPSFEVIVEPTEK.F     | 1 | 2.5923 | 0.362  | <a href="#">P01024</a> |
| <a href="#">CO3_HUMAN</a> | K.GYTQLAFRQPSSAAFAFVK.   | 1 | 4.7648 | 0.497  | <a href="#">P01024</a> |
| <a href="#">CO3_HUMAN</a> | K.KQELSEAEQATR.T         | 1 | 3.4753 | 0.3278 | <a href="#">P01024</a> |
| <a href="#">CO3_HUMAN</a> | R.IPIEDGSGEVVLSRK        | 1 | 2.7258 | 0.1234 | <a href="#">P01024</a> |
| <a href="#">CO3_HUMAN</a> | R.VPVAVQGEDTVQSLTQGDGV   | 1 | 5.1963 | 0.7144 | <a href="#">P01024</a> |



|                           |                           |   |        |        |                        |
|---------------------------|---------------------------|---|--------|--------|------------------------|
| <a href="#">CO3_HUMAN</a> | K.VLLDGVQNP.R.A           | 1 | 3.4662 | 0.573  | <a href="#">P01024</a> |
| <a href="#">CO3_HUMAN</a> | K.RIPIEDGSGEVVLSR.K       | 1 | 3.7351 | 0.4347 | <a href="#">P01024</a> |
| <a href="#">CO3_HUMAN</a> | R.YYGGGYGSTQATFMVFQALA.1  |   | 4.0807 | 0.3507 | <a href="#">P01024</a> |
| <a href="#">CO3_HUMAN</a> | R.EGVQKEDIPPADLSDQVPDTE.3 |   | 5.2856 | 0.59   | <a href="#">P01024</a> |

24

Apolipoprotein A-I precursor (Apo-AI) (ApoA-I) [Contains: Apolipoprotein A-I(1-242)] - F

|                             |                        |   |        |        |                        |
|-----------------------------|------------------------|---|--------|--------|------------------------|
| <a href="#">APOA1_HUMAN</a> | K.ETEGLRQEM*SK.D       | 1 | 2.7655 | 0.3825 | <a href="#">P02647</a> |
| <a href="#">APOA1_HUMAN</a> | K.VSFLSALEEYTK.K       | 1 | 4.6188 | 0.5201 | <a href="#">P02647</a> |
| <a href="#">APOA1_HUMAN</a> | K.VQPYLDDFQKK.W        | 1 | 2.7915 | 0.2288 | <a href="#">P02647</a> |
| <a href="#">APOA1_HUMAN</a> | K.VEPLRAELQEGAR.Q      | 3 | 2.9112 | 0.2793 | <a href="#">P02647</a> |
| <a href="#">APOA1_HUMAN</a> | K.LREQLGPVTQEFWDNLEK.E | 1 | 5.5864 | 0.5742 | <a href="#">P02647</a> |
| <a href="#">APOA1_HUMAN</a> | K.LLDNWDSVTSTFSK.L     | 5 | 4.179  | 0.6194 | <a href="#">P02647</a> |
| <a href="#">APOA1_HUMAN</a> | K.ATEHLSTLSEK.A        | 2 | 3.2232 | 0.4615 | <a href="#">P02647</a> |
| <a href="#">APOA1_HUMAN</a> | K.KWQEEM*ELYR.Q        | 1 | 2.7015 | 0.4586 | <a href="#">P02647</a> |
| <a href="#">APOA1_HUMAN</a> | R.QEM*SKDLEEVK.A       | 1 | 2.4179 | 0.1487 | <a href="#">P02647</a> |
| <a href="#">APOA1_HUMAN</a> | R.THLAPYSDEL.R.Q       | 2 | 2.8422 | 0.5336 | <a href="#">P02647</a> |
| <a href="#">APOA1_HUMAN</a> | R.QGLLPVLESFK.V        | 1 | 2.5099 | 0.1701 | <a href="#">P02647</a> |
| <a href="#">APOA1_HUMAN</a> | K.WQEEM*ELYR.Q         | 1 | 3.0301 | 0.412  | <a href="#">P02647</a> |
| <a href="#">APOA1_HUMAN</a> | R.DYVSQFEGSALGK.Q      | 1 | 4.3233 | 0.6111 | <a href="#">P02647</a> |
| <a href="#">APOA1_HUMAN</a> | K.DSGRDYVSQFEGSALGK.Q  | 1 | 4.8341 | 0.512  | <a href="#">P02647</a> |
| <a href="#">APOA1_HUMAN</a> | R.EQLGPVTQEFWDNLEK.E   | 2 | 4.3223 | 0.6572 | <a href="#">P02647</a> |

21

Inter-alpha-trypsin inhibitor heavy chain H1 precursor (ITI heavy chain H1) (Inter-alpha-

|                             |                           |   |        |        |                          |
|-----------------------------|---------------------------|---|--------|--------|--------------------------|
| <a href="#">ITIH1_HUMAN</a> | R.NHMQYEIVIK.V            | 1 | 3.1952 | 0.376  | <a href="#">P19827</a>   |
| <a href="#">ITIH1_HUMAN</a> | R.QAVDTAVDGVFIR.S         | 2 | 3.8576 | 0.3897 | <a href="#">P19827</a>   |
| <a href="#">ITIH1_HUMAN</a> | R.KAAISGENAGLVR.A         | 1 | 3.928  | 0.4798 | <a href="#">P19827</a>   |
| <a href="#">ITIH1_HUMAN</a> | R.IYEDHDATQQLQGFYSQVAK.1  |   | 4.3672 | 0.333  | 1 <a href="#">P19827</a> |
| <a href="#">ITIH1_HUMAN</a> | R.IADNKQSSF.K.A           | 1 | 3.055  | 0.4421 | 1 <a href="#">P19827</a> |
| <a href="#">ITIH1_HUMAN</a> | R.GHMLENHVER.L            | 1 | 3.0745 | 0.5011 | 1 <a href="#">P19827</a> |
| <a href="#">ITIH1_HUMAN</a> | R.RTFVLSALQPSPTHSSSNTQF.1 |   | 3.7329 | 0.2596 | 1 <a href="#">P19827</a> |
| <a href="#">ITIH1_HUMAN</a> | K.AAISGENAGLVR.A          | 1 | 3.8435 | 0.4867 | <a href="#">P19827</a>   |
| <a href="#">ITIH1_HUMAN</a> | R.ERGHMLENHVER.L          | 1 | 3.383  | 0.3872 | 1 <a href="#">P19827</a> |
| <a href="#">ITIH1_HUMAN</a> | K.QYYEGSEIVVAGR.I         | 5 | 4.2898 | 0.5559 | 1 <a href="#">P19827</a> |
| <a href="#">ITIH1_HUMAN</a> | K.GSLVQASEANLQAAQDFVR.C.2 |   | 6.6478 | 0.6669 | <a href="#">P19827</a>   |
| <a href="#">ITIH1_HUMAN</a> | K.ILGDMQPGDYFDLVLFGR.V.1  |   | 5.1778 | 0.6129 | <a href="#">P19827</a>   |
| <a href="#">ITIH1_HUMAN</a> | R.EVAFDLEIPK.T            | 1 | 2.6577 | 0.4386 | <a href="#">P19827</a>   |
| <a href="#">ITIH1_HUMAN</a> | K.LDAQASFLPK.E            | 2 | 3.6937 | 0.3315 | <a href="#">P19827</a>   |

14

Inter-alpha-trypsin inhibitor heavy chain H3 precursor (ITI heavy chain H3) (Inter-alpha-

|                             |                       |   |        |        |                        |
|-----------------------------|-----------------------|---|--------|--------|------------------------|
| <a href="#">ITIH3_HUMAN</a> | R.FAHNVVTMR.A         | 1 | 2.7646 | 0.3475 | <a href="#">Q06033</a> |
| <a href="#">ITIH3_HUMAN</a> | R.DYIFGNYIER.L        | 1 | 2.5602 | 0.3856 | <a href="#">Q06033</a> |
| <a href="#">ITIH3_HUMAN</a> | K.SMEDKGMTNINDGLLR.G  | 2 | 4.2129 | 0.5338 | <a href="#">Q06033</a> |
| <a href="#">ITIH3_HUMAN</a> | K.SM*EDKGMTNINDGLLR.G | 1 | 3.9832 | 0.1095 | <a href="#">Q06033</a> |
| <a href="#">ITIH3_HUMAN</a> | K.GMTNINDGLLR.G       | 1 | 3.2815 | 0.2333 | <a href="#">Q06033</a> |
| <a href="#">ITIH3_HUMAN</a> | K.ALQERDYIFGNYIER.L   | 1 | 3.6437 | 0.4662 | <a href="#">Q06033</a> |
| <a href="#">ITIH3_HUMAN</a> | R.LVDEDMNSFK.A        | 1 | 3.3033 | 0.508  | <a href="#">Q06033</a> |
| <a href="#">ITIH3_HUMAN</a> | R.LVDEDMNSFKADV.K.G   | 2 | 4.1082 | 0.4389 | <a href="#">Q06033</a> |
| <a href="#">ITIH3_HUMAN</a> | R.SLPEGVANGIEVYSTK.I  | 2 | 4.1435 | 0.5732 | <a href="#">Q06033</a> |
| <a href="#">ITIH3_HUMAN</a> | R.LVDEDM*NSFK.A       | 1 | 3.4448 | 0.4596 | <a href="#">Q06033</a> |
| <a href="#">ITIH3_HUMAN</a> | K.AVSQKTAGLVK.A       | 1 | 2.8527 | 0.378  | <a href="#">Q06033</a> |

12

Serum albumin precursor - Homo sapiens (Human)

|                            |                        |   |        |        |   |                        |
|----------------------------|------------------------|---|--------|--------|---|------------------------|
| <a href="#">ALBU_HUMAN</a> | R.FKDLGEENFK.A         | 1 | 2.5611 | 0.217  | 2 | <a href="#">P02768</a> |
| <a href="#">ALBU_HUMAN</a> | R.YTKKVPQVSTPTLVEVSR.N | 1 | 4.284  | 0.5055 | 2 | <a href="#">P02768</a> |
| <a href="#">ALBU_HUMAN</a> | R.RHPYFYAPELFFAK.R     | 1 | 4.976  | 0.4894 | 1 | <a href="#">P02768</a> |
| <a href="#">ALBU_HUMAN</a> | R.RHPDYSVVLLLR.L       | 1 | 4.1363 | 0.3765 | 1 | <a href="#">P02768</a> |
| <a href="#">ALBU_HUMAN</a> | K.VPQVSTPTLVEVSR.N     | 1 | 3.2789 | 0.5043 | 2 | <a href="#">P02768</a> |
| <a href="#">ALBU_HUMAN</a> | K.TPVSDRVTK.C          | 1 | 2.4732 | 0.2131 | 2 | <a href="#">P02768</a> |
| <a href="#">ALBU_HUMAN</a> | K.KQTALVELVK.H         | 1 | 2.5916 | 0.4004 | 2 | <a href="#">P02768</a> |
| <a href="#">ALBU_HUMAN</a> | K.AVMDDFAAFVEK.C       | 2 | 3.7959 | 0.5896 | 2 | <a href="#">P02768</a> |
| <a href="#">ALBU_HUMAN</a> | K.AVM*DDFAAFVEK.C      | 1 | 3.6565 | 0.5647 | 2 | <a href="#">P02768</a> |
| <a href="#">ALBU_HUMAN</a> | K.KVPQVSTPTLVEVSR.N    | 2 | 4.1777 | 0.6051 | 2 | <a href="#">P02768</a> |

11

Complement C4-A precursor (Acidic complement C4) [Contains: Complement C4 beta

|                            |                      |   |        |        |   |                        |
|----------------------------|----------------------|---|--------|--------|---|------------------------|
| <a href="#">CO4A_HUMAN</a> | K.SHALQLNNR.Q        | 1 | 2.718  | 0.4437 | 3 | <a href="#">P0C0L4</a> |
| <a href="#">CO4A_HUMAN</a> | K.ADGSYAAWLSR.D      | 1 | 2.7223 | 0.4981 | 3 | <a href="#">P0C0L4</a> |
| <a href="#">CO4A_HUMAN</a> | K.AEFQDALEK.L        | 1 | 2.4961 | 0.3418 | 3 | <a href="#">P0C0L4</a> |
| <a href="#">CO4A_HUMAN</a> | K.LNMGITDLQGLR.L     | 1 | 3.3964 | 0.5059 | 3 | <a href="#">P0C0L4</a> |
| <a href="#">CO4A_HUMAN</a> | K.TEQWSTLPPETK.D     | 1 | 3.3432 | 0.448  | 3 | <a href="#">P0C0L4</a> |
| <a href="#">CO4A_HUMAN</a> | K.VLSLAQEQVGGSPK.L   | 1 | 4.5882 | 0.5913 | 3 | <a href="#">P0C0L4</a> |
| <a href="#">CO4A_HUMAN</a> | R.EMSGSPASGIPVK.V    | 1 | 2.7882 | 0.2252 | 3 | <a href="#">P0C0L4</a> |
| <a href="#">CO4A_HUMAN</a> | R.GHLFLQTDQPIYNGQR.V | 1 | 4.7246 | 0.3634 | 3 | <a href="#">P0C0L4</a> |
| <a href="#">CO4A_HUMAN</a> | R.TTNIQGINLLFSSR.R   | 1 | 4.5155 | 0.5392 | 3 | <a href="#">P0C0L4</a> |
| <a href="#">CO4A_HUMAN</a> | R.VFALDQK.M          | 1 | 2.5915 | 0.1934 | 3 | <a href="#">P0C0L4</a> |
| <a href="#">CO4A_HUMAN</a> | K.LNM*GITDLQGLR.L    | 1 | 2.5929 | 0.4385 | 3 | <a href="#">P0C0L4</a> |

9

Hypothetical protein - Homo sapiens (Human)

|                              |                          |   |        |        |    |                        |
|------------------------------|--------------------------|---|--------|--------|----|------------------------|
| <a href="#">A0A5E5_HUMAN</a> | K.DSTYLSSTLTLSK.A        | 1 | 2.6737 | 0.4473 | 21 | <a href="#">A0A5E5</a> |
| <a href="#">A0A5E5_HUMAN</a> | R.TVAAPSVFIFPPSDEQLK.S   | 6 | 4.6175 | 0.6026 | 21 | <a href="#">A0A5E5</a> |
| <a href="#">A0A5E5_HUMAN</a> | K.VDNALQSGNSQESVTEQDSK.2 | 2 | 5.7341 | 0.6742 | 20 | <a href="#">A0A5E5</a> |

6

Ig alpha-2 chain C region - Homo sapiens (Human)

|                             |                       |   |        |        |    |                        |
|-----------------------------|-----------------------|---|--------|--------|----|------------------------|
| <a href="#">IGHA2_HUMAN</a> | R.QEPSQGTTFVAVTSILR.V | 2 | 3.8729 | 0.5346 | 21 | <a href="#">P01877</a> |
| <a href="#">IGHA2_HUMAN</a> | R.WLQGSQELPR.E        | 1 | 2.9744 | 0.3431 | 23 | <a href="#">P01877</a> |
| <a href="#">IGHA2_HUMAN</a> | R.GFSPKDVLR.W         | 1 | 2.8553 | 0.2066 | 23 | <a href="#">P01877</a> |
| <a href="#">IGHA2_HUMAN</a> | R.DASGATFTWTPSSGK.S   | 1 | 3.5943 | 0.5914 | 10 | <a href="#">P01877</a> |
| <a href="#">IGHA2_HUMAN</a> | R.WLQGSQELPREK.Y      | 1 | 3.132  | 0.346  | 23 | <a href="#">P01877</a> |

Ig mu heavy chain disease protein (BOT) - Homo sapiens (Human)

|                            |                      |   |        |        |   |                        |
|----------------------------|----------------------|---|--------|--------|---|------------------------|
| <a href="#">MUCB_HUMAN</a> | R.VFAIPPSFASIFLTK.S  | 2 | 3.1533 | 0.5221 | 5 | <a href="#">P04220</a> |
| <a href="#">MUCB_HUMAN</a> | R.DGFFGNPR.K         | 1 | 2.5819 | 0.3389 | 5 | <a href="#">P04220</a> |
| <a href="#">MUCB_HUMAN</a> | K.YVTSAPMPEPQAPGR.Y  | 1 | 3.6408 | 0.5394 | 5 | <a href="#">P04220</a> |
| <a href="#">MUCB_HUMAN</a> | K.LICQATGFSPR.Q      | 1 | 3.195  | 0.5084 | 5 | <a href="#">P04220</a> |
| <a href="#">MUCB_HUMAN</a> | K.GVALHRPDVYLLPPAR.E | 1 | 4.098  | 0.4257 | 5 | <a href="#">P04220</a> |

Kininogen-1 precursor (Alpha-2-thiol proteinase inhibitor) [Contains: Kininogen-1 heavy

|                            |                     |   |        |        |   |                        |
|----------------------------|---------------------|---|--------|--------|---|------------------------|
| <a href="#">KNG1_HUMAN</a> | K.KYNSQNSNNQFVLYR.I | 1 | 3.342  | 0.3446 |   | <a href="#">P01042</a> |
| <a href="#">KNG1_HUMAN</a> | K.YNSQNSNNQFVLYR.I  | 1 | 4.1565 | 0.491  |   | <a href="#">P01042</a> |
| <a href="#">KNG1_HUMAN</a> | K.TVGSDFYSFK.Y      | 1 | 3.1324 | 0.4782 |   | <a href="#">P01042</a> |
| <a href="#">KNG1_HUMAN</a> | K.KYFIDFVAR.E       | 1 | 3.207  | 0.3921 | 1 | <a href="#">P01042</a> |
| <a href="#">KNG1_HUMAN</a> | K.AATGECTATVGKR.S   | 1 | 2.5896 | 0.5163 |   | <a href="#">P01042</a> |
| <a href="#">KNG1_HUMAN</a> | K.YFIDFVAR.E        | 1 | 2.4007 | 0.3726 | 1 | <a href="#">P01042</a> |

5

Hypothetical protein DKFZp686O01196 - Homo sapiens (Human)

|                              |                       |   |        |        |    |                        |
|------------------------------|-----------------------|---|--------|--------|----|------------------------|
| <a href="#">Q6N094_HUMAN</a> | K.FNWYVDGVEVHNAK.T    | 1 | 5.01   | 0.5468 | 20 | <a href="#">Q6N094</a> |
| <a href="#">Q6N094_HUMAN</a> | K.VSNKALPAPIEKTISK.A  | 1 | 3.9401 | 0.4434 | 24 | <a href="#">Q6N094</a> |
| <a href="#">Q6N094_HUMAN</a> | K.VSNKALPAPIEK.T      | 1 | 3.2937 | 0.3461 | 24 | <a href="#">Q6N094</a> |
| <a href="#">Q6N094_HUMAN</a> | K.TTPPVLDSDGSFFLYSK.L | 1 | 2.8457 | 0.4517 | 19 | <a href="#">Q6N094</a> |
| <a href="#">Q6N094_HUMAN</a> | K.GPSVFPLAPSSK.S      | 1 | 2.809  | 0.3973 | 20 | <a href="#">Q6N094</a> |

Lumican precursor (Keratan sulfate proteoglycan lumican) (KSPG lumican) - Homo sap

|                           |                 |   |        |        |  |                        |
|---------------------------|-----------------|---|--------|--------|--|------------------------|
| <a href="#">LUM_HUMAN</a> | K.ISNIPDEYFK.R  | 1 | 2.9713 | 0.3354 |  | <a href="#">P51884</a> |
| <a href="#">LUM_HUMAN</a> | R.NNQIDHIDEK.A  | 1 | 3.3039 | 0.3087 |  | <a href="#">P51884</a> |
| <a href="#">LUM_HUMAN</a> | R.FNALQYLR.L    | 1 | 2.8459 | 0.2834 |  | <a href="#">P51884</a> |
| <a href="#">LUM_HUMAN</a> | K.RFNALQYLR.L   | 1 | 3.6585 | 0.3249 |  | <a href="#">P51884</a> |
| <a href="#">LUM_HUMAN</a> | K.SLEDLQLTHNK.I | 1 | 2.9502 | 0.3713 |  | <a href="#">P51884</a> |

4

Alpha-2-macroglobulin precursor (Alpha-2-M) - Homo sapiens (Human)

|                            |                      |   |        |        |   |                        |
|----------------------------|----------------------|---|--------|--------|---|------------------------|
| <a href="#">A2MG_HUMAN</a> | R.VGFYSDVMGR.G       | 1 | 3.5296 | 0.5215 |   | <a href="#">P01023</a> |
| <a href="#">A2MG_HUMAN</a> | R.SSGSLLNNAIK.G      | 1 | 2.8061 | 0.2666 | 2 | <a href="#">P01023</a> |
| <a href="#">A2MG_HUMAN</a> | K.DTVIKPLLVEPEGLEK.E | 1 | 3.928  | 0.2964 |   | <a href="#">P01023</a> |
| <a href="#">A2MG_HUMAN</a> | K.AIGYLNTGYQR.Q      | 1 | 2.7937 | 0.3476 |   | <a href="#">P01023</a> |

Apolipoprotein B-100 precursor (Apo B-100) [Contains: Apolipoprotein B-48 (Apo B-48)]

|                            |                   |   |        |        |  |                        |
|----------------------------|-------------------|---|--------|--------|--|------------------------|
| <a href="#">APOB_HUMAN</a> | K.GNVATEISTER.D   | 1 | 2.7243 | 0.5333 |  | <a href="#">P04114</a> |
| <a href="#">APOB_HUMAN</a> | K.NSEEFAMSR.Y     | 1 | 2.8829 | 0.1011 |  | <a href="#">P04114</a> |
| <a href="#">APOB_HUMAN</a> | R.SPSQADINK.I     | 1 | 3.1368 | 0.3502 |  | <a href="#">P04114</a> |
| <a href="#">APOB_HUMAN</a> | K.ALVEQGFTVPEIK.T | 1 | 2.9936 | 0.4148 |  | <a href="#">P04114</a> |

Clusterin precursor (Complement-associated protein SP-40,40) (Complement cytolytic)

|                            |                          |   |        |        |   |                        |
|----------------------------|--------------------------|---|--------|--------|---|------------------------|
| <a href="#">CLUS_HUMAN</a> | R.ASSIIDELFQDR.F         | 1 | 3.813  | 0.5125 | 1 | <a href="#">P10909</a> |
| <a href="#">CLUS_HUMAN</a> | K.FM*ETVAEKALQEYR.K      | 1 | 3.9544 | 0.4796 | 1 | <a href="#">P10909</a> |
| <a href="#">CLUS_HUMAN</a> | R.VTTVASHTSDSDVPSGVTEV\1 | 1 | 3.3325 | 0.3064 |   | <a href="#">P10909</a> |
| <a href="#">CLUS_HUMAN</a> | R.RELDESQAER.L           | 1 | 3.1621 | 0.4634 | 1 | <a href="#">P10909</a> |

Serum amyloid P-component precursor (SAP) (9.5S alpha-1-glycoprotein) [Contains: S

|                            |                      |   |        |        |  |                        |
|----------------------------|----------------------|---|--------|--------|--|------------------------|
| <a href="#">SAMP_HUMAN</a> | R.VGEYSLYIGR.H       | 1 | 3.6209 | 0.4889 |  | <a href="#">P02743</a> |
| <a href="#">SAMP_HUMAN</a> | R.AYSLFSYNTQGR.D     | 1 | 4.1331 | 0.4475 |  | <a href="#">P02743</a> |
| <a href="#">SAMP_HUMAN</a> | K.IVLGQEQDSYGGKFDR.S | 1 | 4.4388 | 0.5523 |  | <a href="#">P02743</a> |
| <a href="#">SAMP_HUMAN</a> | K.IVLGQEQDSYGGK.F    | 1 | 3.2995 | 0.482  |  | <a href="#">P02743</a> |

Serum paraoxonase/arylesterase 1 (EC 3.1.1.2) (EC 3.1.8.1) (PON 1) (Serum aryldialk

|                            |                     |   |        |        |  |                        |
|----------------------------|---------------------|---|--------|--------|--|------------------------|
| <a href="#">PON1_HUMAN</a> | R.IQNILTEPK.V       | 2 | 3.6421 | 0.2234 |  | <a href="#">P27169</a> |
| <a href="#">PON1_HUMAN</a> | K.IFFYDSENPASEVLR.I | 2 | 5.7075 | 0.5951 |  | <a href="#">P27169</a> |

Vitronectin precursor (Serum-spreading factor) (S-protein) (V75) [Contains: Vitronectin

|                            |                      |   |        |        |  |                        |
|----------------------------|----------------------|---|--------|--------|--|------------------------|
| <a href="#">VTNC_HUMAN</a> | R.DWHGVPGQVDAAMAGR.I | 1 | 3.5161 | 0.3501 |  | <a href="#">P04004</a> |
| <a href="#">VTNC_HUMAN</a> | R.DVWGIEGPIDAAFTR.I  | 1 | 3.9927 | 0.4187 |  | <a href="#">P04004</a> |
| <a href="#">VTNC_HUMAN</a> | R.FEDGVLPDYPR.N      | 2 | 4.0638 | 0.5264 |  | <a href="#">P04004</a> |

3

AMBP protein precursor [Contains: Alpha-1-microglobulin (Protein HC) (Complex-formi

|                            |                    |   |        |        |  |                        |
|----------------------------|--------------------|---|--------|--------|--|------------------------|
| <a href="#">AMBP_HUMAN</a> | R.AFIQLWAFDAVK.G   | 1 | 4.0773 | 0.4822 |  | <a href="#">P02760</a> |
| <a href="#">AMBP_HUMAN</a> | R.AFIQLWAFDAVKGK.C | 2 | 3.5754 | 0.4304 |  | <a href="#">P02760</a> |

Haptoglobin-related protein precursor - Homo sapiens (Human)

|                            |                    |   |        |        |   |                        |
|----------------------------|--------------------|---|--------|--------|---|------------------------|
| <a href="#">HPTR_HUMAN</a> | R.TEGDGVYTLNDK.K   | 1 | 3.7554 | 0.4976 | 2 | <a href="#">P00739</a> |
| <a href="#">HPTR_HUMAN</a> | K.GSFPWQAK.M       | 1 | 2.594  | 0.3497 | 3 | <a href="#">P00739</a> |
| <a href="#">HPTR_HUMAN</a> | R.VGYVSGWGQSDNFK.L | 1 | 3.0026 | 0.4906 |   | <a href="#">P00739</a> |

IGLV2-14 protein - Homo sapiens (Human)

|                              |                     |   |        |        |    |                        |
|------------------------------|---------------------|---|--------|--------|----|------------------------|
| <a href="#">A0A5C9_HUMAN</a> | K.YAASSYLSLTPEQWK.S | 1 | 4.7331 | 0.6171 | 29 | <a href="#">A0A5C9</a> |
|------------------------------|---------------------|---|--------|--------|----|------------------------|

2

|                                                                                             |                          |   |        |        |    |                        |
|---------------------------------------------------------------------------------------------|--------------------------|---|--------|--------|----|------------------------|
| <a href="#">A0A5C9_HUMAN</a>                                                                | K.AGVETTTPSK.Q           | 2 | 3.186  | 0.3683 | 17 | <a href="#">A0A5C9</a> |
| Alpha-2-HS-glycoprotein precursor (Fetuin-A) (Alpha-2-Z-globulin) (Ba-alpha-2-glycoprotein) |                          |   |        |        |    |                        |
| <a href="#">FETUA_HUMAN</a>                                                                 | R.HTFMGVSLGSPSGEVSHPR    | 1 | 4.4754 | 0.5378 |    | <a href="#">P02765</a> |
| <a href="#">FETUA_HUMAN</a>                                                                 | K.HTLNQIDEVK.V           | 1 | 3.2658 | 0.444  |    | <a href="#">P02765</a> |
| Apolipoprotein A-II precursor (Apo-AII) (ApoA-II) [Contains: Apolipoprotein A-II(1-76)] -   |                          |   |        |        |    |                        |
| <a href="#">APOA2_HUMAN</a>                                                                 | K.AGTELVNFLSYFVELGTQPAT  | 1 | 4.2802 | 0.508  |    | <a href="#">P02652</a> |
| <a href="#">APOA2_HUMAN</a>                                                                 | K.VKSPELQAEAK.S          | 1 | 2.8377 | 0.314  |    | <a href="#">P02652</a> |
| Complement C1s subcomponent precursor (EC 3.4.21.42) (C1 esterase) [Contains: Cc            |                          |   |        |        |    |                        |
| <a href="#">C1S_HUMAN</a>                                                                   | K.VEDPESTLFGSVIR.Y       | 1 | 4.1359 | 0.5773 |    | <a href="#">P09871</a> |
| <a href="#">C1S_HUMAN</a>                                                                   | K.TMQENSTPRED.-          | 1 | 3.5263 | 0.5241 |    | <a href="#">P09871</a> |
| Complement-activating component of Ra-reactive factor precursor (EC 3.4.21.-) (Ra-re        |                          |   |        |        |    |                        |
| <a href="#">MASP1_HUMAN</a>                                                                 | R.APGELEHGLITFSTR.N      | 1 | 3.2582 | 0.4819 | 1  | <a href="#">P48740</a> |
| <a href="#">MASP1_HUMAN</a>                                                                 | R.TGVITSPDFPNYPK.S       | 1 | 4.3089 | 0.4875 | 2  | <a href="#">P48740</a> |
| Hypothetical protein DKFZp686C15213 - Homo sapiens (Human)                                  |                          |   |        |        |    |                        |
| <a href="#">Q6MZU6_HUMAN</a>                                                                | K.TTPPMLDSDGSFFLYSK.L    | 2 | 3.0566 | 0.5256 | 1  | <a href="#">Q6MZU6</a> |
| IGHA1 protein - Homo sapiens (Human)                                                        |                          |   |        |        |    |                        |
| <a href="#">Q8N5K4_HUMAN</a>                                                                | R.DASGVTFWTWPSSGK.S      | 2 | 4.3007 | 0.5209 | 12 | <a href="#">Q8N5K4</a> |
| IGHG4 protein - Homo sapiens (Human)                                                        |                          |   |        |        |    |                        |
| <a href="#">Q8TC63_HUMAN</a>                                                                | K.YGPPCPCSCPAEFLGGPSVFI2 |   | 4.3162 | 0.2631 | 1  | <a href="#">Q8TC63</a> |
| IGHM protein - Homo sapiens (Human)                                                         |                          |   |        |        |    |                        |
| <a href="#">Q6GMY2_HUMAN</a>                                                                | K.YAATSQVLLPSK.D         | 1 | 3.2688 | 0.381  | 3  | <a href="#">Q6GMY2</a> |
| <a href="#">Q6GMY2_HUMAN</a>                                                                | K.QVSGSVTTDQVQAEAK.E     | 1 | 3.5728 | 0.578  | 4  | <a href="#">Q6GMY2</a> |
| Inter-alpha-trypsin inhibitor heavy chain H4 precursor (ITI heavy chain H4) (Inter-alpha-   |                          |   |        |        |    |                        |
| <a href="#">ITIH4_HUMAN</a>                                                                 | R.GPDVLTATVSGK.L         | 1 | 3.5018 | 0.5418 | 1  | <a href="#">Q14624</a> |
| <a href="#">ITIH4_HUMAN</a>                                                                 | K.AEAQAQYSAAVAK.G        | 1 | 4.7849 | 0.511  | 1  | <a href="#">Q14624</a> |
| Myosin-reactive immunoglobulin heavy chain variable region (Fragment) - Homo sapien         |                          |   |        |        |    |                        |
| <a href="#">Q9UL94_HUMAN</a>                                                                | -.EVQLVESGAIEVK.K        | 2 | 4.0683 | 0.4836 | 2  | <a href="#">Q9UL94</a> |
| Prothrombin precursor (EC 3.4.21.5) (Coagulation factor II) [Contains: Activation peptid    |                          |   |        |        |    |                        |
| <a href="#">THRB_HUMAN</a>                                                                  | R.ELLESYIDGR.I           | 1 | 2.4766 | 0.5165 |    | <a href="#">P00734</a> |
| <a href="#">THRB_HUMAN</a>                                                                  | R.TATSEYQTFFNPR.T        | 1 | 3.632  | 0.5593 |    | <a href="#">P00734</a> |

1

|                                                                                           |                         |   |        |        |    |                        |
|-------------------------------------------------------------------------------------------|-------------------------|---|--------|--------|----|------------------------|
| Adiponectin precursor (Adipocyte, C1q and collagen domain-containing protein) (30 kD      |                         |   |        |        |    |                        |
| <a href="#">ADIPO_HUMAN</a>                                                               | K.GDIGETGVPGAEGPR.G     | 1 | 3.0273 | 0.4112 |    | <a href="#">Q15848</a> |
| Apolipoprotein A-IV precursor (Apo-AIV) (ApoA-IV) - Homo sapiens (Human)                  |                         |   |        |        |    |                        |
| <a href="#">APOA4_HUMAN</a>                                                               | R.TQVNTQAEQLR.R         | 1 | 3.0352 | 0.4069 | 1  | <a href="#">P06727</a> |
| Apolipoprotein D precursor (Apo-D) (ApoD) - Homo sapiens (Human)                          |                         |   |        |        |    |                        |
| <a href="#">APOD_HUMAN</a>                                                                | K.VLNQELR.A             | 1 | 2.5101 | 0.1762 |    | <a href="#">P05090</a> |
| Apolipoprotein E precursor (Apo-E) - Homo sapiens (Human)                                 |                         |   |        |        |    |                        |
| <a href="#">APOE_HUMAN</a>                                                                | R.AATVGSLAGQPLQER.A     | 1 | 4.1129 | 0.5627 |    | <a href="#">P02649</a> |
| Apolipoprotein F precursor (Apo-F) (Lipid transfer inhibitor protein) (LTIP) - Homo sapie |                         |   |        |        |    |                        |
| <a href="#">APOF_HUMAN</a>                                                                | R.SGVQQLIQYYQDQK.D      | 1 | 4.9573 | 0.4634 |    | <a href="#">Q13790</a> |
| Apolipoprotein(a) precursor (EC 3.4.21.-) (Apo(a)) (Lp(a)) - Homo sapiens (Human)         |                         |   |        |        |    |                        |
| <a href="#">APOA_HUMAN</a>                                                                | R.GTYSTTVTGR.T          | 1 | 2.9724 | 0.4457 | 39 | <a href="#">P08519</a> |
| Basic helix-loop-helix domain containing, class B, 9 (P60-like protein) - Homo sapiens (  |                         |   |        |        |    |                        |
| <a href="#">Q6PI77_HUMAN</a>                                                              | K.LLLNMSNPAAARDMINM*K.A | 1 | 2.5985 | 0.2209 |    | <a href="#">Q6PI77</a> |
| CDNA FLJ32471 fis, clone SKNMC2000322, weakly similar to MAJOR CENTROMERE                 |                         |   |        |        |    |                        |
| <a href="#">Q96ME4_HUMAN</a>                                                              | R.KAITLEMK.L            | 1 | 2.5761 | 0.096  |    | <a href="#">Q96ME4</a> |
| Cell division control protein 42 homolog precursor (G25K GTP-binding protein) - Homo      |                         |   |        |        |    |                        |

|                                                                                            |                         |   |        |        |    |                        |
|--------------------------------------------------------------------------------------------|-------------------------|---|--------|--------|----|------------------------|
| <a href="#">CDC42_HUMAN</a>                                                                | K.NKQKPITPETAEK.L       | 1 | 2.7211 | 0.2472 |    | <a href="#">P60953</a> |
| Centromeric protein E (CENP-E) - Homo sapiens (Human)                                      |                         |   |        |        |    |                        |
| <a href="#">CENPE_HUMAN</a>                                                                | K.FQESQEEIKSLTK.E       | 1 | 2.5151 | 0.1822 | 1  | <a href="#">Q02224</a> |
| Chromodomain-helicase-DNA-binding protein 8 (EC 3.6.1.-) (ATP-dependent helicase)          |                         |   |        |        |    |                        |
| <a href="#">CHD8_HUMAN</a>                                                                 | R.IPVINKVDGTLVGEDAPR.R  | 1 | 2.89   | 0.1966 |    | <a href="#">Q9HCK8</a> |
| Chromosome 9 open reading frame 142 - Homo sapiens (Human)                                 |                         |   |        |        |    |                        |
| <a href="#">Q9BUH6_HUMAN</a>                                                               | R.LRALTLGLAKR.V         | 1 | 2.6364 | 0.0967 |    | <a href="#">Q9BUH6</a> |
| Ciliary dynein heavy chain 7 - Homo sapiens (Human)                                        |                         |   |        |        |    |                        |
| <a href="#">Q8WXX0_HUMAN</a>                                                               | R.LDFDNDGM*VEADDLR.S    | 1 | 2.8601 | 0.1359 |    | <a href="#">Q8WXX0</a> |
| Collagen type IX alpha 2 (Fragment) - Homo sapiens (Human)                                 |                         |   |        |        |    |                        |
| <a href="#">Q5QPF8_HUMAN</a>                                                               | -.SPFRGPPGAAGAR.R       | 1 | 3.2364 | 0.1537 |    | <a href="#">Q5QPF8</a> |
| Complement component 4A (Rodgers blood group) - Homo sapiens (Human)                       |                         |   |        |        |    |                        |
| <a href="#">Q5JNX2_HUMAN</a>                                                               | K.AEMADQAAAWLTR.Q       | 1 | 2.9762 | 0.353  | 1  | <a href="#">Q5JNX2</a> |
| Complement component C9 precursor [Contains: Complement component C9a; Compl               |                         |   |        |        |    |                        |
| <a href="#">CO9_HUMAN</a>                                                                  | R.AIEDYINEFSVR.K        | 1 | 2.9034 | 0.3973 |    | <a href="#">P02748</a> |
| Fibronectin precursor (FN) (Cold-insoluble globulin) (CIG) - Homo sapiens (Human)          |                         |   |        |        |    |                        |
| <a href="#">FINC_HUMAN</a>                                                                 | R.WSRPQAPITGYR.I        | 1 | 3.2159 | 0.4075 | 1  | <a href="#">P02751</a> |
| Ficolin-3 precursor (Collagen/fibrinogen domain-containing protein 3) (Collagen/fibrinoc   |                         |   |        |        |    |                        |
| <a href="#">FCN3_HUMAN</a>                                                                 | R.RQDGSVDFFR.S          | 1 | 2.6846 | 0.2293 | 1  | <a href="#">Q75636</a> |
| Haptoglobin precursor [Contains: Haptoglobin alpha chain; Haptoglobin beta chain] - H      |                         |   |        |        |    |                        |
| <a href="#">HPT_HUMAN</a>                                                                  | R.HYEGSTVPEK.K          | 1 | 2.523  | 0.3065 | 2  | <a href="#">P00738</a> |
| HECT, UBA and WWE domain-containing protein 1 (EC 6.3.2.-) (E3 ubiquitin protein lig       |                         |   |        |        |    |                        |
| <a href="#">HUWE1_HUMAN</a>                                                                | R.ELQLPSMSMLTSK.T       | 1 | 2.6009 | 0.1288 | 2  | <a href="#">Q7Z6Z7</a> |
| Heparin cofactor 2 precursor (Heparin cofactor II) (HC-II) (Protease inhibitor leuserpin 2 |                         |   |        |        |    |                        |
| <a href="#">HEP2_HUMAN</a>                                                                 | K.TLEAQLTPR.V           | 1 | 3.0036 | 0.4042 |    | <a href="#">P05546</a> |
| Histidine-rich glycoprotein precursor (Histidine-proline-rich glycoprotein) (HPRG) - Hom   |                         |   |        |        |    |                        |
| <a href="#">HRG_HUMAN</a>                                                                  | R.DGYLFQLLR.I           | 1 | 3.1929 | 0.1649 |    | <a href="#">P04196</a> |
| Hypothetical protein - Homo sapiens (Human)                                                |                         |   |        |        |    |                        |
| <a href="#">Q6P5S3_HUMAN</a>                                                               | K.ANPTVTLFPPSSEELQANK.A | 1 | 2.9752 | 0.4715 | 10 | <a href="#">Q6P5S3</a> |
| Hypothetical protein DKFZp686E23209 - Homo sapiens (Human)                                 |                         |   |        |        |    |                        |
| <a href="#">Q68CN4_HUMAN</a>                                                               | R.EPQVYTLPPSR.E         | 1 | 2.4094 | 0.1179 | 28 | <a href="#">Q68CN4</a> |
| Hypothetical protein FL25415 - Homo sapiens (Human)                                        |                         |   |        |        |    |                        |
| <a href="#">Q7Z5J8_HUMAN</a>                                                               | R.AM*KCKSIPFGMK.S       | 1 | 2.6364 | 0.2184 |    | <a href="#">Q7Z5J8</a> |
| Ig heavy chain V-III region HIL - Homo sapiens (Human)                                     |                         |   |        |        |    |                        |
| <a href="#">HV310_HUMAN</a>                                                                | -.QVKLVQAGGGVVQPGR.S    | 1 | 3.0651 | 0.3446 |    | <a href="#">P01771</a> |
| Ig heavy chain V-III region TIL - Homo sapiens (Human)                                     |                         |   |        |        |    |                        |
| <a href="#">HV304_HUMAN</a>                                                                | -.EVQLLESGGLVQPGGSLR.L  | 1 | 4.8836 | 0.3024 | 5  | <a href="#">P01765</a> |
| Ig kappa chain V-II region Cum - Homo sapiens (Human)                                      |                         |   |        |        |    |                        |
| <a href="#">KV201_HUMAN</a>                                                                | R.FSGSGSGTDFTLK.I       | 1 | 3.3547 | 0.5799 | 9  | <a href="#">P01614</a> |
| Ig kappa chain V-III region SIE - Homo sapiens (Human)                                     |                         |   |        |        |    |                        |
| <a href="#">KV302_HUMAN</a>                                                                | -.EIVLTQSPGTLSPGER.A    | 1 | 3.8722 | 0.4388 | 4  | <a href="#">P01620</a> |
| Ig kappa chain V-III region VG precursor (Fragment) - Homo sapiens (Human)                 |                         |   |        |        |    |                        |
| <a href="#">KV309_HUMAN</a>                                                                | R.LLIYDASNR.A           | 1 | 2.6447 | 0.329  | 1  | <a href="#">P04433</a> |
| Ig lambda chain V-III region LOI - Homo sapiens (Human)                                    |                         |   |        |        |    |                        |
| <a href="#">LV302_HUMAN</a>                                                                | -.YVLTQPPSVSVAPGETAR.L  | 1 | 4.2178 | 0.5052 |    | <a href="#">P80748</a> |
| Ig lambda chain V-IV region Hil - Homo sapiens (Human)                                     |                         |   |        |        |    |                        |
| <a href="#">LV403_HUMAN</a>                                                                | -.SYELTQPPSVSVSPGQTAR.I | 1 | 5.064  | 0.6278 | 1  | <a href="#">P01717</a> |
| Immunoglobulin J chain - Homo sapiens (Human)                                              |                         |   |        |        |    |                        |
| <a href="#">IGJ_HUMAN</a>                                                                  | R.SSEDPNEDIVER.N        | 1 | 3.2484 | 0.3165 |    | <a href="#">P01591</a> |

|                                                                                              |                              |                           |        |        |    |                        |
|----------------------------------------------------------------------------------------------|------------------------------|---------------------------|--------|--------|----|------------------------|
| KIAA1529 - Homo sapiens (Human)                                                              | <a href="#">Q5VV25_HUMAN</a> | K.M*DESKEGSIQGLEEMQVER. 1 | 3.346  | 0.1416 | 1  | <a href="#">Q5VV25</a> |
| Large neutral amino acids transporter small subunit 2 (L-type amino acid transporter 2)      | <a href="#">LAT2_HUMAN</a>   | K.GEYFWLEPK.N 1           | 2.9531 | 0.3508 | 3  | <a href="#">Q9UHI5</a> |
| Latrophilin-2 (Fragment) - Homo sapiens (Human)                                              | <a href="#">Q9UJ49_HUMAN</a> | -.MTGNYLLTNPLLR.P 1       | 2.9573 | 0.2862 |    | <a href="#">Q9UJ49</a> |
| Low-density lipoprotein receptor-related protein 6 precursor - Homo sapiens (Human)          | <a href="#">LRP6_HUMAN</a>   | K.DGATELLLLAR.R 1         | 2.7099 | 0.0908 |    | <a href="#">Q75581</a> |
| LW-1 (Heat shock transcription factor family, X linked 1) - Homo sapiens (Human)             | <a href="#">Q9UBD0_HUMAN</a> | R.SLSMARCEER.N 1          | 2.6242 | 0.223  |    | <a href="#">Q9UBD0</a> |
| MRNA clone with similarity to L-glycerol-3-phosphate:NAD oxidoreductase and albumin          | <a href="#">Q13138_HUMAN</a> | -.M*SVLM*GANIASEVADEK.F 1 | 2.4654 | 0.1366 |    | <a href="#">Q13138</a> |
| Myosin-reactive immunoglobulin light chain variable region (Fragment) - Homo sapiens         | <a href="#">Q9UL83_HUMAN</a> | -.EIVMTQSPATLSVSPGER.A 1  | 4.2188 | 0.5949 | 1  | <a href="#">Q9UL83</a> |
| Myotubularin-related protein 4 (FYVE domain-containing dual specificity protein phosphatase) | <a href="#">Q8IV27_HUMAN</a> | R.SM*DDLLSACDTSSPLTR.T 1  | 2.6669 | 0.1252 |    | <a href="#">Q8IV27</a> |
| PDZ domain-containing RING finger protein 4 (Ligand of Numb-protein X 4) (SEMACIN4)          | <a href="#">PZRN4_HUMAN</a>  | K.TTEQGCSAESKEKVLGSK.L 1  | 2.7356 | 0.2832 |    | <a href="#">Q6ZMN7</a> |
| Prostaglandin F2 receptor negative regulator precursor (Prostaglandin F2-alpha receptor 2)   | <a href="#">FPRP_HUMAN</a>   | K.VSSKNIKSPR.Y 1          | 3.1948 | 0.2248 |    | <a href="#">Q9P2B2</a> |
| Protein S100-A7 (S100 calcium-binding protein A7) (Psoriasin) - Homo sapiens (Human)         | <a href="#">S10A7_HUMAN</a>  | K.GTNYLADVFEK.K 1         | 2.6418 | 0.236  |    | <a href="#">P31151</a> |
| Ras-related protein Rab-23 - Homo sapiens (Human)                                            | <a href="#">RAB23_HUMAN</a>  | K.MVVVGNGAVGK.S 1         | 2.4116 | 0.0955 |    | <a href="#">Q9ULC3</a> |
| Rheumatoid factor D5 light chain (Fragment) - Homo sapiens (Human)                           | <a href="#">A0N5G5_HUMAN</a> | -.EIVLTQSPATLSLSPGER.A 1  | 4.739  | 0.5655 |    | <a href="#">A0N5G5</a> |
| Rhomboid 5 homolog 2 (Rhomboid family member 2) (Rhomboid veinlet-like protein 5)            | <a href="#">Q6PJF5_HUMAN</a> | R.SVLDATGQRCR.V 1         | 2.409  | 0.1536 | 2  | <a href="#">Q6PJF5</a> |
| Serum amyloid A-4 protein precursor (Constitutively expressed serum amyloid A protein 4)     | <a href="#">SAA4_HUMAN</a>   | K.EALQGVGDMGR.A 1         | 2.9208 | 0.3914 |    | <a href="#">P35542</a> |
| Transthyretin precursor (Prealbumin) (TBPA) (TTR) (ATTR) - Homo sapiens (Human)              | <a href="#">TTHY_HUMAN</a>   | K.AADDTWEPFASGK.T 1       | 4.035  | 0.6265 |    | <a href="#">P02766</a> |
| VH1 protein precursor (Fragment) - Homo sapiens (Human)                                      | <a href="#">Q95978_HUMAN</a> | K.GPSVFPLAPCSR.S 1        | 2.5089 | 0.3022 | 11 | <a href="#">Q95978</a> |
| VPS29 protein - Homo sapiens (Human)                                                         | <a href="#">Q8N0S8_HUMAN</a> | R.QGPGAGLGK.A 1           | 2.4154 | 0.1155 |    | <a href="#">Q8N0S8</a> |

## Complement C4-A precursor (Acidic complement C4) [Contains: Complement C4 beta

|                            |                            |        |        |   |                        |
|----------------------------|----------------------------|--------|--------|---|------------------------|
| <a href="#">CO4A_HUMAN</a> | K.M*RPSTDTITVM*VENSHGLR. 1 | 5.3455 | 0.4948 | 3 | <a href="#">P0C0L4</a> |
| <a href="#">CO4A_HUMAN</a> | K.VDFTLSSER.D 1            | 2.6247 | 0.4715 | 3 | <a href="#">P0C0L4</a> |
| <a href="#">CO4A_HUMAN</a> | R.EAPKVVEEQESR.V 1         | 2.5773 | 0.5395 | 3 | <a href="#">P0C0L4</a> |
| <a href="#">CO4A_HUMAN</a> | R.DFALLSLQVPLKDAK.S 1      | 3.8599 | 0.4941 | 3 | <a href="#">P0C0L4</a> |
| <a href="#">CO4A_HUMAN</a> | R.AVGSGATFSHYMILSR.G 1     | 3.6985 | 0.6084 | 3 | <a href="#">P0C0L4</a> |
| <a href="#">CO4A_HUMAN</a> | R.ALERGLQDEDGYR.M 1        | 2.5935 | 0.2722 | 3 | <a href="#">P0C0L4</a> |
| <a href="#">CO4A_HUMAN</a> | K.YVLPNFEVK.I 1            | 2.4632 | 0.3441 | 3 | <a href="#">P0C0L4</a> |
| <a href="#">CO4A_HUMAN</a> | K.VVEEQESR.V 4             | 2.5262 | 0.3543 | 3 | <a href="#">P0C0L4</a> |
| <a href="#">CO4A_HUMAN</a> | K.VLSLAQEQVGGSPK.L 1       | 4.731  | 0.5709 | 3 | <a href="#">P0C0L4</a> |
| <a href="#">CO4A_HUMAN</a> | K.VGGNSKGTCLKVLR.T 1       | 2.8159 | 0.2124 | 3 | <a href="#">P0C0L4</a> |

|                            |                          |    |        |        |   |                        |
|----------------------------|--------------------------|----|--------|--------|---|------------------------|
| <a href="#">CO4A_HUMAN</a> | R.DKGQAGLQR.A            | 11 | 2.7415 | 0.2568 | 3 | <a href="#">P0C0L4</a> |
| <a href="#">CO4A_HUMAN</a> | K.TFFRGLESQTK.L          | 1  | 2.4056 | 0.2849 | 3 | <a href="#">P0C0L4</a> |
| <a href="#">CO4A_HUMAN</a> | K.TEQWSTLPPETK.D         | 1  | 2.8973 | 0.4007 | 3 | <a href="#">P0C0L4</a> |
| <a href="#">CO4A_HUMAN</a> | K.PVQGVAYVR.F            | 1  | 2.3957 | 0.4719 | 3 | <a href="#">P0C0L4</a> |
| <a href="#">CO4A_HUMAN</a> | K.MRPSTDITVMVENSHGLR.V   | 1  | 5.427  | 0.6066 | 3 | <a href="#">P0C0L4</a> |
| <a href="#">CO4A_HUMAN</a> | R.EELVYELNPLDHR.G        | 1  | 3.8013 | 0.4943 | 3 | <a href="#">P0C0L4</a> |
| <a href="#">CO4A_HUMAN</a> | K.M*RPSTDITVMVENSHGLR.\2 | 2  | 4.748  | 0.3489 | 3 | <a href="#">P0C0L4</a> |
| <a href="#">CO4A_HUMAN</a> | R.GLQDEDEGYR.M           | 2  | 2.8566 | 0.5383 | 3 | <a href="#">P0C0L4</a> |
| <a href="#">CO4A_HUMAN</a> | K.LVNGQSHISLSK.A         | 1  | 3.7374 | 0.4945 | 3 | <a href="#">P0C0L4</a> |
| <a href="#">CO4A_HUMAN</a> | K.LNMGITDLQGLR.L         | 2  | 3.3918 | 0.4391 | 3 | <a href="#">P0C0L4</a> |
| <a href="#">CO4A_HUMAN</a> | K.LGQYASPTAKR.C          | 1  | 3.1966 | 0.3869 | 3 | <a href="#">P0C0L4</a> |
| <a href="#">CO4A_HUMAN</a> | K.ITQVLHFTK.D            | 1  | 2.4765 | 0.4482 | 4 | <a href="#">P0C0L4</a> |
| <a href="#">CO4A_HUMAN</a> | K.AINEKLGQYASPTAK.R      | 2  | 4.3174 | 0.543  | 3 | <a href="#">P0C0L4</a> |
| <a href="#">CO4A_HUMAN</a> | K.MRPSTDITVM*VENSHGLR.\1 | 1  | 3.6823 | 0.374  | 3 | <a href="#">P0C0L4</a> |
| <a href="#">CO4A_HUMAN</a> | R.NVNFQKAIENEK.L         | 1  | 3.6832 | 0.2978 | 3 | <a href="#">P0C0L4</a> |
| <a href="#">CO4A_HUMAN</a> | R.YVSHFETEGPHVLLYFDSVPT  | 1  | 4.5682 | 0.5779 | 3 | <a href="#">P0C0L4</a> |
| <a href="#">CO4A_HUMAN</a> | R.YYIGKPVQGVAYVR.F       | 1  | 3.9092 | 0.5945 | 3 | <a href="#">P0C0L4</a> |
| <a href="#">CO4A_HUMAN</a> | R.VTASDPLDTLGSEGALSPGG\1 | 1  | 4.5595 | 0.6608 | 3 | <a href="#">P0C0L4</a> |
| <a href="#">CO4A_HUMAN</a> | R.VTASDPLDTLGSEGALSPGG\2 | 1  | 4.2656 | 0.6063 | 3 | <a href="#">P0C0L4</a> |
| <a href="#">CO4A_HUMAN</a> | R.TYNVDMK.N              | 1  | 3.3693 | 0.4127 | 3 | <a href="#">P0C0L4</a> |
| <a href="#">CO4A_HUMAN</a> | R.TTNIQGINLLFSSR.R       | 4  | 4.5898 | 0.5961 | 3 | <a href="#">P0C0L4</a> |
| <a href="#">CO4A_HUMAN</a> | R.TLEIPGNSDPNMIPDGFNSY   | 1  | 3.5815 | 0.63   | 3 | <a href="#">P0C0L4</a> |
| <a href="#">CO4A_HUMAN</a> | R.SFFPENWLWR.V           | 1  | 2.6393 | 0.3122 | 3 | <a href="#">P0C0L4</a> |
| <a href="#">CO4A_HUMAN</a> | R.RGHLFLQTDQPIYNPGQR.V   | 2  | 4.6473 | 0.5456 | 3 | <a href="#">P0C0L4</a> |
| <a href="#">CO4A_HUMAN</a> | R.RCSVFGAPSKSR.L         | 1  | 3.3448 | 0.3473 | 3 | <a href="#">P0C0L4</a> |
| <a href="#">CO4A_HUMAN</a> | R.GLEELQFSLGSK.I         | 1  | 4.2515 | 0.4403 | 3 | <a href="#">P0C0L4</a> |
| <a href="#">CO4A_HUMAN</a> | R.NVNFQKAIENEKLGQYASPTAK | 1  | 4.5351 | 0.5425 | 3 | <a href="#">P0C0L4</a> |
| <a href="#">CO4A_HUMAN</a> | R.EMSGSPASGIPVK.V        | 1  | 2.6797 | 0.3507 | 3 | <a href="#">P0C0L4</a> |
| <a href="#">CO4A_HUMAN</a> | R.LTVAAPPSGGPGFLSIER.P   | 1  | 3.3765 | 0.4992 | 3 | <a href="#">P0C0L4</a> |
| <a href="#">CO4A_HUMAN</a> | R.HLVPGAPFLLQALVR.E      | 2  | 3.8238 | 0.4893 | 3 | <a href="#">P0C0L4</a> |
| <a href="#">CO4A_HUMAN</a> | R.GSFEPVGDVAVSK.V        | 1  | 2.8299 | 0.4985 | 3 | <a href="#">P0C0L4</a> |
| <a href="#">CO4A_HUMAN</a> | R.GPEVQLVAHSPWLKDSLRS.T1 | 1  | 3.4913 | 0.4631 | 3 | <a href="#">P0C0L4</a> |
| <a href="#">CO4A_HUMAN</a> | R.GPEVQLVAHSPWLK.D       | 1  | 4.5666 | 0.5095 | 3 | <a href="#">P0C0L4</a> |
| <a href="#">CO4A_HUMAN</a> | R.GLQDEDEGYRM*K.F        | 1  | 2.6251 | 0.3491 | 3 | <a href="#">P0C0L4</a> |
| <a href="#">CO4A_HUMAN</a> | K.AEFQDALEK.L            | 1  | 2.8694 | 0.3723 | 3 | <a href="#">P0C0L4</a> |
| <a href="#">CO4A_HUMAN</a> | R.GLESQTKLVNGQSHISLSK.A  | 1  | 3.4579 | 0.1749 | 3 | <a href="#">P0C0L4</a> |
| <a href="#">CO4A_HUMAN</a> | R.GHLFLQTDQPIYNPGQR.V    | 2  | 6.3752 | 0.5835 | 3 | <a href="#">P0C0L4</a> |
| <a href="#">CO4A_HUMAN</a> | R.FGLLDEDEGKKTFFR.G      | 1  | 3.3017 | 0.3036 | 3 | <a href="#">P0C0L4</a> |
| <a href="#">CO4A_HUMAN</a> | R.RCSVFGAPSK.S           | 1  | 2.8722 | 0.2106 | 3 | <a href="#">P0C0L4</a> |
| <a href="#">CO4A_HUMAN</a> | K.AINEKLGQYASPTAKR.C     | 1  | 4.4912 | 0.5899 | 3 | <a href="#">P0C0L4</a> |

### Inter-alpha-trypsin inhibitor heavy chain H2 precursor (ITI heavy chain H2) (Inter-alpha-

|                            |                          |   |        |        |   |                        |
|----------------------------|--------------------------|---|--------|--------|---|------------------------|
| <a href="#">ITI2_HUMAN</a> | K.RLSNENHGIAQR.I         | 2 | 3.7835 | 0.4039 | 1 | <a href="#">P19823</a> |
| <a href="#">ITI2_HUMAN</a> | R.ETAVDGELVVLYDVK.R      | 1 | 3.8402 | 0.6318 | 1 | <a href="#">P19823</a> |
| <a href="#">ITI2_HUMAN</a> | R.FLHVPDTFEGHFDGVPVISK.C | 1 | 3.3018 | 0.5154 | 2 | <a href="#">P19823</a> |
| <a href="#">ITI2_HUMAN</a> | K.VVNNSPQPQNVVFDVQIPK.G  | 1 | 4.9614 | 0.4964 | 2 | <a href="#">P19823</a> |
| <a href="#">ITI2_HUMAN</a> | K.KFYNQVSTPLLR.N         | 1 | 3.8649 | 0.5346 | 1 | <a href="#">P19823</a> |
| <a href="#">ITI2_HUMAN</a> | K.HADPDFTR.K             | 1 | 2.512  | 0.3838 | 1 | <a href="#">P19823</a> |
| <a href="#">ITI2_HUMAN</a> | K.GQQKAHVSKPTVAQQR.I     | 1 | 4.0853 | 0.4042 | 2 | <a href="#">P19823</a> |
| <a href="#">ITI2_HUMAN</a> | K.FYVSTPLLR.N            | 1 | 3.4113 | 0.4264 | 1 | <a href="#">P19823</a> |
| <a href="#">ITI2_HUMAN</a> | R.MATTM*IQSK.V           | 1 | 2.9762 | 0.4598 | 2 | <a href="#">P19823</a> |
| <a href="#">ITI2_HUMAN</a> | R.IYGNQDTSSQLK.K         | 1 | 3.5901 | 0.4237 | 1 | <a href="#">P19823</a> |

22

|                             |                         |   |        |        |   |                        |
|-----------------------------|-------------------------|---|--------|--------|---|------------------------|
| <a href="#">ITIH2_HUMAN</a> | R.IYGNQDTSSQLKK.F       | 2 | 3.8157 | 0.4006 | 1 | <a href="#">P19823</a> |
| <a href="#">ITIH2_HUMAN</a> | R.IYGNQDTSSQLKKFYVQVSTF | 1 | 4.3299 | 0.4929 | 1 | <a href="#">P19823</a> |
| <a href="#">ITIH2_HUMAN</a> | K.AHVSFKPTVAQQR.I       | 1 | 3.5895 | 0.6213 | 2 | <a href="#">P19823</a> |
| <a href="#">ITIH2_HUMAN</a> | R.M*LADAPPQDPSCCSGALYY( | 1 | 3.4703 | 0.5436 | 1 | <a href="#">P19823</a> |
| <a href="#">ITIH2_HUMAN</a> | R.AEDHFSVIDFNQIR.T      | 1 | 4.6563 | 0.288  | 1 | <a href="#">P19823</a> |
| <a href="#">ITIH2_HUMAN</a> | R.LSNENHGIAQR.I         | 2 | 4.1516 | 0.3894 | 1 | <a href="#">P19823</a> |
| <a href="#">ITIH2_HUMAN</a> | R.MATMIQSKVVNNSPQPQNV   | 1 | 4.56   | 0.4861 | 2 | <a href="#">P19823</a> |
| <a href="#">ITIH2_HUMAN</a> | R.MLADAPPQDPSCCSGALYYG  | 2 | 3.6164 | 0.4878 | 1 | <a href="#">P19823</a> |
| <a href="#">ITIH2_HUMAN</a> | R.NDLISATKTQVADAKR.Y    | 1 | 3.7345 | 0.5161 | 1 | <a href="#">P19823</a> |
| <a href="#">ITIH2_HUMAN</a> | R.SSALDMENFRTEVNVLPQAK. | 1 | 4.0338 | 0.4172 | 2 | <a href="#">P19823</a> |
| <a href="#">ITIH2_HUMAN</a> | R.SSIKEKTVGR.A          | 1 | 2.4603 | 0.1843 | 2 | <a href="#">P19823</a> |
| <a href="#">ITIH2_HUMAN</a> | R.TWRNDLISATK.T         | 1 | 2.521  | 0.1842 | 1 | <a href="#">P19823</a> |
| <a href="#">ITIH2_HUMAN</a> | R.TWRNDLISATKTQVADAK.R  | 1 | 4.2409 | 0.5001 | 1 | <a href="#">P19823</a> |
| <a href="#">ITIH2_HUMAN</a> | R.YIEKIQPSGGTNINEALLR.A | 1 | 5.4825 | 0.5517 | 1 | <a href="#">P19823</a> |
| <a href="#">ITIH2_HUMAN</a> | R.MATMIQSK.V            | 1 | 2.8126 | 0.5382 | 2 | <a href="#">P19823</a> |

## Complement C3 precursor [Contains: Complement C3 beta chain; Complement C3 alpi

|                           |                          |   |        |        |  |                        |
|---------------------------|--------------------------|---|--------|--------|--|------------------------|
| <a href="#">CO3_HUMAN</a> | R.SNLDEIIAEENIVSR.S      | 1 | 5.4557 | 0.5715 |  | <a href="#">P01024</a> |
| <a href="#">CO3_HUMAN</a> | K.SDDKVTLEER.L           | 1 | 3.2588 | 0.2563 |  | <a href="#">P01024</a> |
| <a href="#">CO3_HUMAN</a> | K.SGSDEVQVGQQR.T         | 1 | 3.3117 | 0.3516 |  | <a href="#">P01024</a> |
| <a href="#">CO3_HUMAN</a> | K.VLLDGVQNP.R.A          | 1 | 3.3183 | 0.5598 |  | <a href="#">P01024</a> |
| <a href="#">CO3_HUMAN</a> | R.EGVQKEDIPPADLSDQVPDTE  | 3 | 5.5142 | 0.5336 |  | <a href="#">P01024</a> |
| <a href="#">CO3_HUMAN</a> | R.HQQTVTIPPK.S           | 1 | 2.505  | 0.3936 |  | <a href="#">P01024</a> |
| <a href="#">CO3_HUMAN</a> | R.IPIEDGSGEVVLSR.K       | 1 | 3.1751 | 0.4506 |  | <a href="#">P01024</a> |
| <a href="#">CO3_HUMAN</a> | R.VPVAVQGEDTVQSLTQGDGV   | 2 | 4.4772 | 0.6429 |  | <a href="#">P01024</a> |
| <a href="#">CO3_HUMAN</a> | K.RIPIEDGSGEVVLSRK.V     | 1 | 4.4831 | 0.5354 |  | <a href="#">P01024</a> |
| <a href="#">CO3_HUMAN</a> | R.SEETKENEGFTVTAEGK.G    | 1 | 4.4223 | 0.3828 |  | <a href="#">P01024</a> |
| <a href="#">CO3_HUMAN</a> | R.ILLQGTPVAQM*TEDAVIDAER | 1 | 3.3808 | 0.4497 |  | <a href="#">P01024</a> |
| <a href="#">CO3_HUMAN</a> | K.KQELSEAEQATR.T         | 2 | 3.718  | 0.3724 |  | <a href="#">P01024</a> |
| <a href="#">CO3_HUMAN</a> | K.GYTQQLAFRQPSSAFAAFVK.  | 1 | 4.5889 | 0.5592 |  | <a href="#">P01024</a> |
| <a href="#">CO3_HUMAN</a> | K.AGDFLEANYMNLQR.S       | 1 | 4.1106 | 0.4254 |  | <a href="#">P01024</a> |
| <a href="#">CO3_HUMAN</a> | K.AGDFLEANYM*NLQR.S      | 1 | 2.6288 | 0.2629 |  | <a href="#">P01024</a> |
| <a href="#">CO3_HUMAN</a> | R.TKKQELSEAEQATR.T       | 2 | 4.237  | 0.5487 |  | <a href="#">P01024</a> |
| <a href="#">CO3_HUMAN</a> | K.QELSEAEQATR.T          | 1 | 2.7646 | 0.3225 |  | <a href="#">P01024</a> |

18

## Ceruloplasmin precursor (EC 1.16.3.1) (Ferroxidase) - Homo sapiens (Human)

|                            |                         |   |        |        |  |                        |
|----------------------------|-------------------------|---|--------|--------|--|------------------------|
| <a href="#">CERU_HUMAN</a> | K.NNEGTYSPNYNPQSR.S     | 1 | 4.7426 | 0.606  |  | <a href="#">P00450</a> |
| <a href="#">CERU_HUMAN</a> | K.GAYPLSIEPIGVR.F       | 1 | 3.5718 | 0.4988 |  | <a href="#">P00450</a> |
| <a href="#">CERU_HUMAN</a> | K.HYYIGIETTWDYASDHGEK.K | 1 | 6.6025 | 0.6253 |  | <a href="#">P00450</a> |
| <a href="#">CERU_HUMAN</a> | K.LVYREYTDASFTNRK.E     | 1 | 3.5225 | 0.4532 |  | <a href="#">P00450</a> |
| <a href="#">CERU_HUMAN</a> | K.MYSAVDPTKDIFTGLIGPM*† | 1 | 3.6968 | 0.5466 |  | <a href="#">P00450</a> |
| <a href="#">CERU_HUMAN</a> | K.VNKDDEEFIESNK.M       | 1 | 4.1833 | 0.3575 |  | <a href="#">P00450</a> |
| <a href="#">CERU_HUMAN</a> | R.EYTDASFTNRK           | 1 | 2.8128 | 0.4277 |  | <a href="#">P00450</a> |
| <a href="#">CERU_HUMAN</a> | R.M*FTTAPDQVDEDEDFQESI  | 1 | 4.0628 | 0.5182 |  | <a href="#">P00450</a> |
| <a href="#">CERU_HUMAN</a> | K.M*YSAVDPTKDIFTGLIGPM† | 1 | 4.2403 | 0.3812 |  | <a href="#">P00450</a> |
| <a href="#">CERU_HUMAN</a> | R.QSEDSTFYLG.R.T        | 2 | 3.2006 | 0.4715 |  | <a href="#">P00450</a> |
| <a href="#">CERU_HUMAN</a> | R.EYTDASFTNRK.E         | 1 | 2.5209 | 0.3365 |  | <a href="#">P00450</a> |
| <a href="#">CERU_HUMAN</a> | R.IYHSHIDAPK.D          | 1 | 2.4698 | 0.3693 |  | <a href="#">P00450</a> |
| <a href="#">CERU_HUMAN</a> | K.ALYLQYTDIFR.T         | 1 | 4.0149 | 0.5188 |  | <a href="#">P00450</a> |
| <a href="#">CERU_HUMAN</a> | R.GVYSSDVFDFPGTYQTLEMF  | 1 | 4.5534 | 0.564  |  | <a href="#">P00450</a> |
| <a href="#">CERU_HUMAN</a> | R.FNKNNEGTYSPNYNPQSR.‡  | 1 | 4.9563 | 0.5036 |  | <a href="#">P00450</a> |



|                                                                                           |                          |   |        |        |   |                        |
|-------------------------------------------------------------------------------------------|--------------------------|---|--------|--------|---|------------------------|
| <a href="#">CERU_HUMAN</a>                                                                | R.TTIEKPVWLGLFLGPIIK.A   | 2 | 3.5467 | 0.4755 |   | <a href="#">P00450</a> |
| Inter-alpha-trypsin inhibitor heavy chain H1 precursor (ITI heavy chain H1) (Inter-alpha- |                          |   |        |        |   |                        |
| <a href="#">ITIH1_HUMAN</a>                                                               | K.GSLVQASEANLQAAQDFVR.C  | 2 | 6.1873 | 0.6434 |   | <a href="#">P19827</a> |
| <a href="#">ITIH1_HUMAN</a>                                                               | R.GMADQDGLKPTIDKPSSEDSPI | 1 | 4.2484 | 0.5302 | 1 | <a href="#">P19827</a> |
| <a href="#">ITIH1_HUMAN</a>                                                               | R.EVAFDLEIPK.T           | 1 | 2.7124 | 0.4066 |   | <a href="#">P19827</a> |
| <a href="#">ITIH1_HUMAN</a>                                                               | R.ERGHMLENHVER.L         | 1 | 3.6744 | 0.3971 | 1 | <a href="#">P19827</a> |
| <a href="#">ITIH1_HUMAN</a>                                                               | K.QYYEGSEIVVAGR.I        | 1 | 4.0929 | 0.4873 | 1 | <a href="#">P19827</a> |
| <a href="#">ITIH1_HUMAN</a>                                                               | K.LDAQASFLPKELAAQTIKK.S  | 1 | 3.3189 | 0.4358 |   | <a href="#">P19827</a> |
| <a href="#">ITIH1_HUMAN</a>                                                               | K.ILGDM*QPGDYFDLVLFGR.V  | 1 | 4.1008 | 0.4885 |   | <a href="#">P19827</a> |
| <a href="#">ITIH1_HUMAN</a>                                                               | R.GMADQDGLKPTIDKPSSEDSPI | 1 | 4.9796 | 0.4231 | 1 | <a href="#">P19827</a> |
| <a href="#">ITIH1_HUMAN</a>                                                               | K.AAISGENAGLVR.A         | 1 | 3.7029 | 0.4929 |   | <a href="#">P19827</a> |
| <a href="#">ITIH1_HUMAN</a>                                                               | R.IADNKQSSFKA            | 1 | 3.0309 | 0.4321 | 1 | <a href="#">P19827</a> |
| <a href="#">ITIH1_HUMAN</a>                                                               | R.KAAISGENAGLVR.A        | 2 | 4.1054 | 0.47   |   | <a href="#">P19827</a> |
| <a href="#">ITIH1_HUMAN</a>                                                               | R.QAVDTAVDGVFIR.S        | 3 | 3.3237 | 0.4209 |   | <a href="#">P19827</a> |
| <a href="#">ITIH1_HUMAN</a>                                                               | K.LDAQASFLPK.E           | 2 | 3.5069 | 0.3116 |   | <a href="#">P19827</a> |

16

|                                                                                           |                         |   |        |        |  |                        |
|-------------------------------------------------------------------------------------------|-------------------------|---|--------|--------|--|------------------------|
| Apolipoprotein A-I precursor (Apo-AI) (ApoA-I) [Contains: Apolipoprotein A-I(1-242)] - I- |                         |   |        |        |  |                        |
| <a href="#">APOA1_HUMAN</a>                                                               | K.ATEHLSTLSEK.A         | 1 | 3.1331 | 0.4471 |  | <a href="#">P02647</a> |
| <a href="#">APOA1_HUMAN</a>                                                               | K.DSGRDYVSQFEGSALGK.Q   | 1 | 2.6999 | 0.1416 |  | <a href="#">P02647</a> |
| <a href="#">APOA1_HUMAN</a>                                                               | K.ETEGLRQEM*SK.D        | 1 | 2.438  | 0.3291 |  | <a href="#">P02647</a> |
| <a href="#">APOA1_HUMAN</a>                                                               | K.LLDNWDSVTSTFSK.L      | 3 | 4.1332 | 0.6337 |  | <a href="#">P02647</a> |
| <a href="#">APOA1_HUMAN</a>                                                               | K.LREQLGPVTQEFWDNLEK.E  | 1 | 5.1349 | 0.5009 |  | <a href="#">P02647</a> |
| <a href="#">APOA1_HUMAN</a>                                                               | K.QLNLKLLDNWDSVTSTFSK.L | 1 | 3.6643 | 0.5707 |  | <a href="#">P02647</a> |
| <a href="#">APOA1_HUMAN</a>                                                               | K.VEPLRAELQEGAR.Q       | 2 | 2.8214 | 0.2719 |  | <a href="#">P02647</a> |
| <a href="#">APOA1_HUMAN</a>                                                               | K.VQPYLDDFQK.K          | 1 | 2.4122 | 0.2945 |  | <a href="#">P02647</a> |
| <a href="#">APOA1_HUMAN</a>                                                               | K.VQPYLDDFQKK.W         | 1 | 2.6481 | 0.1298 |  | <a href="#">P02647</a> |
| <a href="#">APOA1_HUMAN</a>                                                               | K.VSFLSALEEYTK.K        | 1 | 4.3079 | 0.4842 |  | <a href="#">P02647</a> |
| <a href="#">APOA1_HUMAN</a>                                                               | R.LAEYHAKATEHLSTLSEK.A  | 1 | 4.5138 | 0.5435 |  | <a href="#">P02647</a> |
| <a href="#">APOA1_HUMAN</a>                                                               | R.EQLGPVTQEFWDNLEK.E    | 2 | 4.3563 | 0.5978 |  | <a href="#">P02647</a> |

14

Serum albumin precursor - Homo sapiens (Human)

|                            |                        |   |        |        |   |                        |
|----------------------------|------------------------|---|--------|--------|---|------------------------|
| <a href="#">ALBU_HUMAN</a> | K.AEFAEVSK.L           | 1 | 2.6498 | 0.1925 | 1 | <a href="#">P02768</a> |
| <a href="#">ALBU_HUMAN</a> | R.FKDLGEENFK.A         | 1 | 2.7715 | 0.2678 | 2 | <a href="#">P02768</a> |
| <a href="#">ALBU_HUMAN</a> | K.KQTALVELVK.H         | 1 | 2.7693 | 0.3609 | 2 | <a href="#">P02768</a> |
| <a href="#">ALBU_HUMAN</a> | K.AVM*DDFAAFVEK.C      | 1 | 3.4279 | 0.5199 | 2 | <a href="#">P02768</a> |
| <a href="#">ALBU_HUMAN</a> | K.VFDEFKPLVEEPQNLIK.Q  | 1 | 4.4292 | 0.4409 | 2 | <a href="#">P02768</a> |
| <a href="#">ALBU_HUMAN</a> | K.TPVSDRVTK.C          | 1 | 2.436  | 0.3475 | 2 | <a href="#">P02768</a> |
| <a href="#">ALBU_HUMAN</a> | R.AFKAWAVAR.L          | 1 | 2.5932 | 0.3575 | 1 | <a href="#">P02768</a> |
| <a href="#">ALBU_HUMAN</a> | R.LAKTYETTLEK.C        | 1 | 2.7136 | 0.4055 | 1 | <a href="#">P02768</a> |
| <a href="#">ALBU_HUMAN</a> | R.RHPDYSVLLLR.L        | 1 | 4.6035 | 0.4053 | 1 | <a href="#">P02768</a> |
| <a href="#">ALBU_HUMAN</a> | R.RHPYFYAPPELLFFAK.R   | 1 | 3.2116 | 0.2868 | 1 | <a href="#">P02768</a> |
| <a href="#">ALBU_HUMAN</a> | R.YTKKVPQVSTPTLVEVSR.N | 1 | 3.8278 | 0.5115 | 2 | <a href="#">P02768</a> |
| <a href="#">ALBU_HUMAN</a> | K.KVPQVSTPTLVEVSR.N    | 3 | 4.6438 | 0.5704 | 2 | <a href="#">P02768</a> |

10

Complement C1s subcomponent precursor (EC 3.4.21.42) (C1 esterase) [Contains: Cc

|                           |                        |   |        |        |   |                        |
|---------------------------|------------------------|---|--------|--------|---|------------------------|
| <a href="#">C1S_HUMAN</a> | K.M*LTPEHVFIHPGWK.L    | 1 | 3.6098 | 0.4597 |   | <a href="#">P09871</a> |
| <a href="#">C1S_HUMAN</a> | K.TM*QENSTPRED.-       | 1 | 2.5095 | 0.4583 |   | <a href="#">P09871</a> |
| <a href="#">C1S_HUMAN</a> | K.GDSGGAFVQDPNDK.T     | 1 | 4.6296 | 0.5134 |   | <a href="#">P09871</a> |
| <a href="#">C1S_HUMAN</a> | K.TMQENSTPRED.-        | 2 | 3.3133 | 0.5043 |   | <a href="#">P09871</a> |
| <a href="#">C1S_HUMAN</a> | R.VKNYVDWIMK.T         | 1 | 3.4796 | 0.311  |   | <a href="#">P09871</a> |
| <a href="#">C1S_HUMAN</a> | R.SSNPHSPIVEEFQVPYNK.L | 1 | 4.0838 | 0.3753 | 1 | <a href="#">P09871</a> |

|                           |                    |   |        |        |   |                        |
|---------------------------|--------------------|---|--------|--------|---|------------------------|
| <a href="#">C1S_HUMAN</a> | K.VEDPESTLFGSVIR.Y | 1 | 3.6472 | 0.5109 |   | <a href="#">P09871</a> |
| <a href="#">C1S_HUMAN</a> | K.SDFSNEER.F       | 1 | 2.5573 | 0.3803 | 4 | <a href="#">P09871</a> |
| <a href="#">C1S_HUMAN</a> | K.EDTPNSVWEPAK.A   | 1 | 3.2727 | 0.3885 | 1 | <a href="#">P09871</a> |

8

Inter-alpha-trypsin inhibitor heavy chain H3 precursor (ITI heavy chain H3) (Inter-alpha-

|                             |                      |   |        |        |  |                        |
|-----------------------------|----------------------|---|--------|--------|--|------------------------|
| <a href="#">ITIH3_HUMAN</a> | K.SMEDKGMTNINDGLLR.G | 1 | 4.4179 | 0.5161 |  | <a href="#">Q06033</a> |
| <a href="#">ITIH3_HUMAN</a> | R.SLPEGVANGIEVYSTK.I | 1 | 3.95   | 0.5713 |  | <a href="#">Q06033</a> |
| <a href="#">ITIH3_HUMAN</a> | R.LVDEDMNSFKADVK.G   | 1 | 4.2542 | 0.4803 |  | <a href="#">Q06033</a> |
| <a href="#">ITIH3_HUMAN</a> | R.DYIFGNYIER.L       | 1 | 2.9156 | 0.4235 |  | <a href="#">Q06033</a> |
| <a href="#">ITIH3_HUMAN</a> | K.KGHVSFKPSLDQQR.S   | 1 | 3.2329 | 0.4348 |  | <a href="#">Q06033</a> |
| <a href="#">ITIH3_HUMAN</a> | K.ALQERDYIFGNYIER.L  | 2 | 3.9918 | 0.5458 |  | <a href="#">Q06033</a> |
| <a href="#">ITIH3_HUMAN</a> | R.LVDEDMNSFK.A       | 1 | 3.496  | 0.5126 |  | <a href="#">Q06033</a> |

7

Alpha-2-macroglobulin precursor (Alpha-2-M) - Homo sapiens (Human)

|                            |                      |   |        |        |  |                        |
|----------------------------|----------------------|---|--------|--------|--|------------------------|
| <a href="#">A2MG_HUMAN</a> | K.DTVIKPLLVEPEGLEK.E | 1 | 3.8172 | 0.4013 |  | <a href="#">P01023</a> |
| <a href="#">A2MG_HUMAN</a> | R.VGFYESDVMGR.G      | 2 | 3.685  | 0.534  |  | <a href="#">P01023</a> |
| <a href="#">A2MG_HUMAN</a> | R.QTVSWAVTPK.S       | 1 | 2.401  | 0.3288 |  | <a href="#">P01023</a> |
| <a href="#">A2MG_HUMAN</a> | K.LPPNVVEESAR.A      | 1 | 2.9241 | 0.3693 |  | <a href="#">P01023</a> |
| <a href="#">A2MG_HUMAN</a> | K.AIGYLNTGYQR.Q      | 1 | 2.7452 | 0.2976 |  | <a href="#">P01023</a> |
| <a href="#">A2MG_HUMAN</a> | K.NEDSLVFVQTDK.S     | 1 | 3.9914 | 0.5453 |  | <a href="#">P01023</a> |

6

Ig alpha-2 chain C region - Homo sapiens (Human)

|                             |                          |   |        |        |    |                        |
|-----------------------------|--------------------------|---|--------|--------|----|------------------------|
| <a href="#">IGHA2_HUMAN</a> | K.SAVQGPPER.D            | 1 | 2.5989 | 0.4698 | 18 | <a href="#">P01877</a> |
| <a href="#">IGHA2_HUMAN</a> | R.WLQGSQELPR.E           | 1 | 2.7773 | 0.4151 | 23 | <a href="#">P01877</a> |
| <a href="#">IGHA2_HUMAN</a> | R.QEPSQGTTTFAVTSILR.V    | 1 | 4.2826 | 0.5297 | 21 | <a href="#">P01877</a> |
| <a href="#">IGHA2_HUMAN</a> | R.GFSPKDVLR.W            | 1 | 2.4818 | 0.2204 | 23 | <a href="#">P01877</a> |
| <a href="#">IGHA2_HUMAN</a> | K.YLTWASRQEPSQGTTTFAVT.1 | 1 | 6.6449 | 0.6461 | 21 | <a href="#">P01877</a> |
| <a href="#">IGHA2_HUMAN</a> | R.WLQGSQELPREK.Y         | 1 | 3.0378 | 0.2827 | 23 | <a href="#">P01877</a> |

5

AMBIP protein precursor [Contains: Alpha-1-microglobulin (Protein HC) (Complex-formi

|                             |                    |   |        |        |  |                        |
|-----------------------------|--------------------|---|--------|--------|--|------------------------|
| <a href="#">AMBIP_HUMAN</a> | R.TVAACNLPIVR.G    | 1 | 3.4799 | 0.4835 |  | <a href="#">P02760</a> |
| <a href="#">AMBIP_HUMAN</a> | R.AFIQLWAFDAVKGK.C | 2 | 4.1325 | 0.4926 |  | <a href="#">P02760</a> |
| <a href="#">AMBIP_HUMAN</a> | R.AFIQLWAFDAVK.G   | 2 | 3.8073 | 0.5939 |  | <a href="#">P02760</a> |

Hypothetical protein - Homo sapiens (Human)

|                              |                          |   |        |        |    |                        |
|------------------------------|--------------------------|---|--------|--------|----|------------------------|
| <a href="#">A0A5E5_HUMAN</a> | R.TVAAPSVFIFPPSDEQLK.S   | 4 | 3.6829 | 0.5561 | 21 | <a href="#">A0A5E5</a> |
| <a href="#">A0A5E5_HUMAN</a> | K.VDNALQSGNSQESVTEQDSK.1 | 1 | 5.8573 | 0.63   | 20 | <a href="#">A0A5E5</a> |

Lumican precursor (Keratan sulfate proteoglycan lumican) (KSPG lumican) - Homo saq

|                           |                           |   |        |        |  |                        |
|---------------------------|---------------------------|---|--------|--------|--|------------------------|
| <a href="#">LUM_HUMAN</a> | K.RFNALQYLR.L             | 1 | 3.0978 | 0.2047 |  | <a href="#">P51884</a> |
| <a href="#">LUM_HUMAN</a> | R.FNALQYLR.L              | 1 | 2.5981 | 0.3308 |  | <a href="#">P51884</a> |
| <a href="#">LUM_HUMAN</a> | K.SLEDLQLTHNK.I           | 1 | 3.2307 | 0.4638 |  | <a href="#">P51884</a> |
| <a href="#">LUM_HUMAN</a> | K.ISNIPDEYFK.R            | 1 | 2.9579 | 0.2464 |  | <a href="#">P51884</a> |
| <a href="#">LUM_HUMAN</a> | K.NIPTVNENLENYYLEVNQLEK.1 | 1 | 4.1032 | 0.3938 |  | <a href="#">P51884</a> |

4

Apolipoprotein A-II precursor (Apo-AII) (ApoA-II) [Contains: Apolipoprotein A-II(1-76)] -

|                             |                      |   |        |        |  |                        |
|-----------------------------|----------------------|---|--------|--------|--|------------------------|
| <a href="#">APOA2_HUMAN</a> | K.VKSPQLQAEAKSYFEK.S | 1 | 3.6573 | 0.4774 |  | <a href="#">P02652</a> |
| <a href="#">APOA2_HUMAN</a> | K.SPQLQAEAK.S        | 1 | 3.4355 | 0.3032 |  | <a href="#">P02652</a> |
| <a href="#">APOA2_HUMAN</a> | K.VKSPQLQAEAK.S      | 2 | 3.7409 | 0.1945 |  | <a href="#">P02652</a> |

Hypothetical protein DKFZp686O01196 - Homo sapiens (Human)

|                              |                        |   |        |        |    |                        |
|------------------------------|------------------------|---|--------|--------|----|------------------------|
| <a href="#">Q6N094_HUMAN</a> | K.GPSVFPLAPSSK.S       | 1 | 3.0124 | 0.4499 | 20 | <a href="#">Q6N094</a> |
| <a href="#">Q6N094_HUMAN</a> | K.TTPPVLDSDGSSFFLYSK.L | 1 | 2.9721 | 0.4571 | 19 | <a href="#">Q6N094</a> |

|                                                                                                |                      |   |        |        |    |                        |
|------------------------------------------------------------------------------------------------|----------------------|---|--------|--------|----|------------------------|
| <a href="#">Q6N094_HUMAN</a>                                                                   | K.FNWYVDGVEVHNAK.T   | 1 | 4.7663 | 0.5151 | 20 | <a href="#">Q6N094</a> |
| <a href="#">Q6N094_HUMAN</a>                                                                   | K.VSNKALPAIEK.T      | 1 | 3.4142 | 0.3664 | 24 | <a href="#">Q6N094</a> |
| <b>Serum amyloid P-component precursor (SAP) (9.5S alpha-1-glycoprotein) [Contains: S</b>      |                      |   |        |        |    |                        |
| <a href="#">SAMP_HUMAN</a>                                                                     | K.IVLGQEQDSYGGK.F    | 2 | 3.2867 | 0.4962 |    | <a href="#">P02743</a> |
| <a href="#">SAMP_HUMAN</a>                                                                     | K.IVLGQEQDSYGGKFDR.S | 1 | 4.6182 | 0.578  |    | <a href="#">P02743</a> |
| <a href="#">SAMP_HUMAN</a>                                                                     | R.AYSLFSYNTQGR.D     | 1 | 2.9559 | 0.5446 |    | <a href="#">P02743</a> |
| <b>Vitronectin precursor (Serum-spreading factor) (S-protein) (V75) [Contains: Vitronectin</b> |                      |   |        |        |    |                        |
| <a href="#">VTNC_HUMAN</a>                                                                     | R.DVWGIEGPIDAAFTR.I  | 1 | 4.667  | 0.2991 |    | <a href="#">P04004</a> |
| <a href="#">VTNC_HUMAN</a>                                                                     | R.FEDGVLDPDYPR.N     | 1 | 3.6219 | 0.4228 |    | <a href="#">P04004</a> |
| <a href="#">VTNC_HUMAN</a>                                                                     | R.IYISGMAPRPSLAK.K   | 1 | 3.4761 | 0.363  |    | <a href="#">P04004</a> |
| <a href="#">VTNC_HUMAN</a>                                                                     | K.TYLFKGSQYWR.F      | 1 | 2.4056 | 0.4457 |    | <a href="#">P04004</a> |

3

|                                                                                                |                        |   |        |        |    |                        |
|------------------------------------------------------------------------------------------------|------------------------|---|--------|--------|----|------------------------|
| <b>Apolipoprotein B-100 precursor (Apo B-100) [Contains: Apolipoprotein B-48 (Apo B-48)</b>    |                        |   |        |        |    |                        |
| <a href="#">APOB_HUMAN</a>                                                                     | R.ALVDTLKFVTQAEQAK.Q   | 1 | 5.2569 | 0.6109 |    | <a href="#">P04114</a> |
| <a href="#">APOB_HUMAN</a>                                                                     | R.DLKVEDIPLAR.I        | 1 | 2.5225 | 0.1314 |    | <a href="#">P04114</a> |
| <a href="#">APOB_HUMAN</a>                                                                     | R.SPSQADINK.I          | 1 | 2.6767 | 0.3156 |    | <a href="#">P04114</a> |
| <b>Haptoglobin-related protein precursor - Homo sapiens (Human)</b>                            |                        |   |        |        |    |                        |
| <a href="#">HPTR_HUMAN</a>                                                                     | R.TEGDGVYTLNDK.K       | 1 | 3.1341 | 0.4401 | 2  | <a href="#">P00739</a> |
| <a href="#">HPTR_HUMAN</a>                                                                     | R.VGYVSGWGQSDNFK.L     | 1 | 4.2868 | 0.6115 |    | <a href="#">P00739</a> |
| <a href="#">HPTR_HUMAN</a>                                                                     | R.ILGGHLDKGSFPWQAK.M   | 1 | 3.4527 | 0.3699 | 3  | <a href="#">P00739</a> |
| <b>IGHA1 protein - Homo sapiens (Human)</b>                                                    |                        |   |        |        |    |                        |
| <a href="#">Q8N5K4_HUMAN</a>                                                                   | R.DASGVTFWTWPSSGK.S    | 2 | 4.4406 | 0.6319 | 12 | <a href="#">Q8N5K4</a> |
| <a href="#">Q8N5K4_HUMAN</a>                                                                   | K.SAVQGPPDR.D          | 1 | 2.5366 | 0.3242 | 4  | <a href="#">Q8N5K4</a> |
| <b>IGHM protein - Homo sapiens (Human)</b>                                                     |                        |   |        |        |    |                        |
| <a href="#">Q6GMY2_HUMAN</a>                                                                   | K.QVGSVTTDQVQAEAK.E    | 1 | 3.5819 | 0.5938 | 4  | <a href="#">Q6GMY2</a> |
| <a href="#">Q6GMY2_HUMAN</a>                                                                   | K.YAATSQVLLPSK.D       | 1 | 2.8675 | 0.3813 | 3  | <a href="#">Q6GMY2</a> |
| <a href="#">Q6GMY2_HUMAN</a>                                                                   | R.EGKQVGSVTTDQVQAEAK.I | 1 | 4.1758 | 0.101  | 4  | <a href="#">Q6GMY2</a> |
| <b>Immunoglobulin J chain - Homo sapiens (Human)</b>                                           |                        |   |        |        |    |                        |
| <a href="#">IGJ_HUMAN</a>                                                                      | R.IIRSEDPNEDIVER.NIR.I | 1 | 3.7276 | 0.393  |    | <a href="#">P01591</a> |
| <a href="#">IGJ_HUMAN</a>                                                                      | R.IIRSEDPNEDIVER.N     | 1 | 4.04   | 0.3934 |    | <a href="#">P01591</a> |
| <a href="#">IGJ_HUMAN</a>                                                                      | R.SSEDPNEDIVER.N       | 1 | 3.1595 | 0.2789 |    | <a href="#">P01591</a> |
| <b>Kininogen-1 precursor (Alpha-2-thiol proteinase inhibitor) [Contains: Kininogen-1 heavy</b> |                        |   |        |        |    |                        |
| <a href="#">KNG1_HUMAN</a>                                                                     | K.YNSQNQSNQFVLYR.I     | 1 | 4.2439 | 0.5298 |    | <a href="#">P01042</a> |
| <a href="#">KNG1_HUMAN</a>                                                                     | K.YFIDFVAR.E           | 1 | 2.8595 | 0.4346 | 1  | <a href="#">P01042</a> |
| <a href="#">KNG1_HUMAN</a>                                                                     | K.KYFIDFVAR.E          | 1 | 2.982  | 0.4953 | 1  | <a href="#">P01042</a> |

2

|                                                                                                    |                         |   |        |        |   |                        |
|----------------------------------------------------------------------------------------------------|-------------------------|---|--------|--------|---|------------------------|
| <b>Alpha-2-HS-glycoprotein precursor (Fetuin-A) (Alpha-2-Z-globulin) (Ba-alpha-2-glycoprotein)</b> |                         |   |        |        |   |                        |
| <a href="#">FETUA_HUMAN</a>                                                                        | K.HTLNQIDEVK.V          | 1 | 3.2736 | 0.4267 |   | <a href="#">P02765</a> |
| <a href="#">FETUA_HUMAN</a>                                                                        | R.HTFMGVSLGSPSGEVSHPR.1 | 1 | 5.0783 | 0.6454 |   | <a href="#">P02765</a> |
| <b>Clusterin precursor (Complement-associated protein SP-40,40) (Complement cytolysis</b>          |                         |   |        |        |   |                        |
| <a href="#">CLUS_HUMAN</a>                                                                         | R.ASSIIDELFQDR.F        | 1 | 4.0437 | 0.481  | 1 | <a href="#">P10909</a> |
| <a href="#">CLUS_HUMAN</a>                                                                         | R.ELDESLQVAER.L         | 1 | 2.8502 | 0.425  | 1 | <a href="#">P10909</a> |
| <b>Fibronectin precursor (FN) (Cold-insoluble globulin) (CIG) - Homo sapiens (Human)</b>           |                         |   |        |        |   |                        |
| <a href="#">FINC_HUMAN</a>                                                                         | R.WSRPQAPITGYR.I        | 1 | 3.2693 | 0.29   | 1 | <a href="#">P02751</a> |
| <a href="#">FINC_HUMAN</a>                                                                         | R.FTNIGPDTMR.V          | 1 | 2.4988 | 0.2377 | 1 | <a href="#">P02751</a> |
| <b>Ig lambda chain V-IV region H11 - Homo sapiens (Human)</b>                                      |                         |   |        |        |   |                        |
| <a href="#">LV403_HUMAN</a>                                                                        | -.SYELTQPPSVSPGQTAR.I   | 2 | 5.3552 | 0.6273 | 1 | <a href="#">P01717</a> |
| <b>Ig mu heavy chain disease protein (BOT) - Homo sapiens (Human)</b>                              |                         |   |        |        |   |                        |
| <a href="#">MUCB_HUMAN</a>                                                                         | K.GVALHRPDVYLLPPAR.E    | 1 | 3.9092 | 0.4529 | 5 | <a href="#">P04220</a> |
| <a href="#">MUCB_HUMAN</a>                                                                         | K.YVTSAPMPEPQAPGR.Y     | 1 | 3.7289 | 0.5464 | 5 | <a href="#">P04220</a> |

IGLV2-14 protein - Homo sapiens (Human)

|                              |                     |   |        |        |    |                        |
|------------------------------|---------------------|---|--------|--------|----|------------------------|
| <a href="#">A0A5C9_HUMAN</a> | K.AGVETTPSK.Q       | 1 | 3.3895 | 0.3475 | 17 | <a href="#">A0A5C9</a> |
| <a href="#">A0A5C9_HUMAN</a> | K.YAASSYLSLTPEQWK.S | 1 | 5.3057 | 0.6077 | 29 | <a href="#">A0A5C9</a> |

Inter-alpha-trypsin inhibitor heavy chain H4 precursor (ITI heavy chain H4) (Inter-alpha-

|                             |                   |   |        |        |   |                        |
|-----------------------------|-------------------|---|--------|--------|---|------------------------|
| <a href="#">ITIH4_HUMAN</a> | R.GPDVLTATVSGK.L  | 1 | 3.0093 | 0.4413 | 1 | <a href="#">Q14624</a> |
| <a href="#">ITIH4_HUMAN</a> | K.AEAQAQYSAAVAK.G | 1 | 4.4999 | 0.5246 | 1 | <a href="#">Q14624</a> |

Plasma protease C1 inhibitor precursor (C1 Inh) (C1Inh) (C1 esterase inhibitor) (C1-inh

|                           |                    |   |        |        |   |                        |
|---------------------------|--------------------|---|--------|--------|---|------------------------|
| <a href="#">IC1_HUMAN</a> | R.LEDMEQALSPSVFK.A | 1 | 4.578  | 0.5767 | 1 | <a href="#">P05155</a> |
| <a href="#">IC1_HUMAN</a> | K.TNLESILSYPK.D    | 1 | 3.5952 | 0.4402 | 1 | <a href="#">P05155</a> |

Prothrombin precursor (EC 3.4.21.5) (Coagulation factor II) [Contains: Activation peptid

|                            |                  |   |        |        |  |                        |
|----------------------------|------------------|---|--------|--------|--|------------------------|
| <a href="#">THRB_HUMAN</a> | R.TATSEYQTFNPR.T | 2 | 3.9466 | 0.4962 |  | <a href="#">P00734</a> |
|----------------------------|------------------|---|--------|--------|--|------------------------|

Thiopurine S-methyltransferase (EC 2.1.1.67) (Thiopurine methyltransferase) - Homo s

|                            |                         |   |        |        |  |                        |
|----------------------------|-------------------------|---|--------|--------|--|------------------------|
| <a href="#">TPMT_HUMAN</a> | R.VFFPLCGKAVEM*KWFADR.C | 2 | 2.9926 | 0.0932 |  | <a href="#">P51580</a> |
|----------------------------|-------------------------|---|--------|--------|--|------------------------|

Zinc finger CCHC domain-containing protein 11 - Homo sapiens (Human)

|                             |                       |   |        |        |   |                        |
|-----------------------------|-----------------------|---|--------|--------|---|------------------------|
| <a href="#">ZCH11_HUMAN</a> | R.M*DDFQLKGIVVEEKFK.W | 2 | 3.2114 | 0.3501 | 1 | <a href="#">Q5TAX3</a> |
|-----------------------------|-----------------------|---|--------|--------|---|------------------------|

1

60S ribosomal protein L3-like - Homo sapiens (Human)

|                            |                        |   |        |        |  |                        |
|----------------------------|------------------------|---|--------|--------|--|------------------------|
| <a href="#">RL3L_HUMAN</a> | K.VACIGAWHWPARGVCSIA.R | 1 | 2.6599 | 0.2128 |  | <a href="#">Q92901</a> |
|----------------------------|------------------------|---|--------|--------|--|------------------------|

Anti-folate binding protein (Fragment) - Homo sapiens (Human)

|                              |                      |   |       |        |  |                        |
|------------------------------|----------------------|---|-------|--------|--|------------------------|
| <a href="#">A2NYQ9_HUMAN</a> | -.QVQLVESGGGLVQPGR.S | 1 | 2.457 | 0.4229 |  | <a href="#">A2NYQ9</a> |
|------------------------------|----------------------|---|-------|--------|--|------------------------|

Antithrombin III variant - Homo sapiens (Human)

|                              |                |   |        |        |  |                        |
|------------------------------|----------------|---|--------|--------|--|------------------------|
| <a href="#">Q7KZ97_HUMAN</a> | R.DDLVSDAFHK.A | 1 | 2.4967 | 0.4915 |  | <a href="#">Q7KZ97</a> |
|------------------------------|----------------|---|--------|--------|--|------------------------|

Apolipoprotein E precursor (Apo-E) - Homo sapiens (Human)

|                            |                 |   |        |        |  |                        |
|----------------------------|-----------------|---|--------|--------|--|------------------------|
| <a href="#">APOE_HUMAN</a> | R.LSKELQAAQAR.L | 1 | 3.3117 | 0.4569 |  | <a href="#">P02649</a> |
|----------------------------|-----------------|---|--------|--------|--|------------------------|

C4B1 (Complement component 4B) (Childo blood group) - Homo sapiens (Human)

|                              |                 |   |        |        |  |                        |
|------------------------------|-----------------|---|--------|--------|--|------------------------|
| <a href="#">Q6U2E9_HUMAN</a> | R.GSSTWLTAFLV.V | 1 | 2.6087 | 0.3873 |  | <a href="#">Q6U2E9</a> |
|------------------------------|-----------------|---|--------|--------|--|------------------------|

CD180 antigen precursor (Lymphocyte antigen 64) (Radioprotective 105 kDa protein) -

|                             |                    |   |       |        |  |                        |
|-----------------------------|--------------------|---|-------|--------|--|------------------------|
| <a href="#">CD180_HUMAN</a> | K.ECPQLELLDLAFTR.L | 1 | 2.999 | 0.4318 |  | <a href="#">Q99467</a> |
|-----------------------------|--------------------|---|-------|--------|--|------------------------|

CDNA FLJ40176 fis, clone TESTI2017102. (Fragment) - Homo sapiens (Human)

|                              |                  |   |        |        |  |                        |
|------------------------------|------------------|---|--------|--------|--|------------------------|
| <a href="#">Q8N800_HUMAN</a> | K.QLKAHLLQKEEK.D | 1 | 2.8733 | 0.0945 |  | <a href="#">Q8N800</a> |
|------------------------------|------------------|---|--------|--------|--|------------------------|

Ciliary dynein heavy chain 7 - Homo sapiens (Human)

|                              |                      |   |       |        |  |                        |
|------------------------------|----------------------|---|-------|--------|--|------------------------|
| <a href="#">Q8WXX0_HUMAN</a> | K.TQTM*RGSPFIKPYEK.Q | 1 | 2.473 | 0.1831 |  | <a href="#">Q8WXX0</a> |
|------------------------------|----------------------|---|-------|--------|--|------------------------|

Complement C4-B precursor (Basic complement C4) [Contains: Complement C4 beta c

|                            |                       |   |        |        |   |                        |
|----------------------------|-----------------------|---|--------|--------|---|------------------------|
| <a href="#">CO4B_HUMAN</a> | K.LQETSNWLLSQQADGSFQI | 1 | 3.6095 | 0.3175 | 1 | <a href="#">P0C0L5</a> |
|----------------------------|-----------------------|---|--------|--------|---|------------------------|

Complement component C9 precursor [Contains: Complement component C9a; Compl

|                           |                  |   |       |        |  |                        |
|---------------------------|------------------|---|-------|--------|--|------------------------|
| <a href="#">CO9_HUMAN</a> | R.AIEDYINEFSVR.K | 1 | 3.339 | 0.4863 |  | <a href="#">P02748</a> |
|---------------------------|------------------|---|-------|--------|--|------------------------|

Complement-activating component of Ra-reactive factor precursor (EC 3.4.21.-) (Ra-re

|                             |                     |   |        |        |   |                        |
|-----------------------------|---------------------|---|--------|--------|---|------------------------|
| <a href="#">MASP1_HUMAN</a> | R.TGVITSPDFPNPYPK.S | 1 | 3.7292 | 0.4799 | 2 | <a href="#">P48740</a> |
|-----------------------------|---------------------|---|--------|--------|---|------------------------|

D site-binding protein (Albumin D box-binding protein) (Albumin D-element-binding prot

|                           |                        |   |        |        |   |                        |
|---------------------------|------------------------|---|--------|--------|---|------------------------|
| <a href="#">DBP_HUMAN</a> | R.TPAPLLLGGPAGTPPGGALI | 1 | 3.2803 | 0.1027 | 1 | <a href="#">Q10586</a> |
|---------------------------|------------------------|---|--------|--------|---|------------------------|

ELKS/RAB6-interacting/CAST family member 1 (RAB6-interacting protein 2) (ERC prot

|                             |                  |   |        |        |  |                        |
|-----------------------------|------------------|---|--------|--------|--|------------------------|
| <a href="#">RB6I2_HUMAN</a> | R.EM*VLAQEESAR.T | 1 | 2.5384 | 0.1349 |  | <a href="#">Q8IUD2</a> |
|-----------------------------|------------------|---|--------|--------|--|------------------------|

Endothelial zinc finger protein induced by tumor necrosis factor alpha (Zinc finger prote

|                             |                        |   |        |        |  |                        |
|-----------------------------|------------------------|---|--------|--------|--|------------------------|
| <a href="#">ZNF71_HUMAN</a> | K.PFECSECGKAFSKNSLSTQH | 1 | 3.3151 | 0.2297 |  | <a href="#">Q9NQZ8</a> |
|-----------------------------|------------------------|---|--------|--------|--|------------------------|

GRIP and coiled-coil domain-containing protein 2 (Golgi coiled coil protein GCC185) (C

|                            |                         |   |        |        |   |                         |
|----------------------------|-------------------------|---|--------|--------|---|-------------------------|
| <a href="#">GCC2_HUMAN</a> | K.AIHQEEVKELMCQIEASAK.E | 1 | 2.7128 | 0.1074 | 1 | <a href="#">Q8IWIJ2</a> |
|----------------------------|-------------------------|---|--------|--------|---|-------------------------|

Histidine-rich glycoprotein precursor (Histidine-proline-rich glycoprotein) (HPRG) - Hom

|                           |               |   |        |        |  |                        |
|---------------------------|---------------|---|--------|--------|--|------------------------|
| <a href="#">HRG_HUMAN</a> | R.DGYLFQLLR.I | 1 | 2.5636 | 0.1762 |  | <a href="#">P04196</a> |
|---------------------------|---------------|---|--------|--------|--|------------------------|

Hypothetical protein DKFZp686N1815 - Homo sapiens (Human)

|                                                                                      |                           |   |        |        |   |                        |
|--------------------------------------------------------------------------------------|---------------------------|---|--------|--------|---|------------------------|
| <a href="#">Q5HYI3_HUMAN</a>                                                         | -.MSDALIKVSM*ENTENSVDISK  | 1 | 3.2663 | 0.1666 |   | <a href="#">Q5HYI3</a> |
| Ig heavy chain V-III region TIL - Homo sapiens (Human)                               |                           |   |        |        |   |                        |
| <a href="#">HV304_HUMAN</a>                                                          | -.EVQLLESGGGLVQPGGSLR.L   | 1 | 5.0079 | 0.2959 | 5 | <a href="#">P01765</a> |
| Ig lambda chain V-III region LOI - Homo sapiens (Human)                              |                           |   |        |        |   |                        |
| <a href="#">LV302_HUMAN</a>                                                          | -.YVLTQPPSVSVAPGETAR.L    | 1 | 3.9234 | 0.4707 |   | <a href="#">P80748</a> |
| IGHG4 protein - Homo sapiens (Human)                                                 |                           |   |        |        |   |                        |
| <a href="#">Q8TC63_HUMAN</a>                                                         | K.YGPPCPCSCAPEFLGGPSVFI   | 1 | 3.2921 | 0.2131 | 1 | <a href="#">Q8TC63</a> |
| KIAA1729 protein (Fragment) - Homo sapiens (Human)                                   |                           |   |        |        |   |                        |
| <a href="#">Q9C0D4_HUMAN</a>                                                         | K.QGRLLSRSLISIR.N         | 1 | 2.7735 | 0.0979 |   | <a href="#">Q9C0D4</a> |
| KNG1 protein - Homo sapiens (Human)                                                  |                           |   |        |        |   |                        |
| <a href="#">Q05CF8_HUMAN</a>                                                         | R.IGEIKEETTSHLR.S         | 1 | 3.7015 | 0.458  |   | <a href="#">Q05CF8</a> |
| Makorin-2 (RING finger protein 62) - Homo sapiens (Human)                            |                           |   |        |        |   |                        |
| <a href="#">MKRN2_HUMAN</a>                                                          | K.ACKYFEQ GK.G            | 1 | 2.9893 | 0.2316 |   | <a href="#">Q9H000</a> |
| Myosin-10 (Myosin heavy chain 10) (Myosin heavy chain, nonmuscle IIb) (Nonmuscle n   |                           |   |        |        |   |                        |
| <a href="#">MYH10_HUMAN</a>                                                          | R.ALEEAL EAK.E            | 1 | 2.7396 | 0.1632 | 4 | <a href="#">P35580</a> |
| Myosin-reactive immunoglobulin light chain variable region (Fragment) - Homo sapiens |                           |   |        |        |   |                        |
| <a href="#">Q9UL83_HUMAN</a>                                                         | -.EIVMTQSPATLSVSPGER.A    | 1 | 4.3905 | 0.5531 | 1 | <a href="#">Q9UL83</a> |
| Neuron navigator 1 - Homo sapiens (Human)                                            |                           |   |        |        |   |                        |
| <a href="#">Q5VUY9_HUMAN</a>                                                         | -.M*DARIVHALLAGR M*LGSSVK | 1 | 2.4134 | 0.1138 |   | <a href="#">Q5VUY9</a> |
| OTTHUMP00000016950 (Fragment) - Homo sapiens (Human)                                 |                           |   |        |        |   |                        |
| <a href="#">Q5T699_HUMAN</a>                                                         | R.ELESCLRREYTPENLPLLLLQ'  | 1 | 3.4942 | 0.2002 |   | <a href="#">Q5T699</a> |
| PDZ domain-containing RING finger protein 4 (Ligand of Numb-protein X 4) (SEMACAI    |                           |   |        |        |   |                        |
| <a href="#">PZRN4_HUMAN</a>                                                          | K.TTEQGCSAESKEKVL EGSK.L  | 1 | 2.8186 | 0.3041 |   | <a href="#">Q6ZMN7</a> |
| Protein FAM71A - Homo sapiens (Human)                                                |                           |   |        |        |   |                        |
| <a href="#">FA71A_HUMAN</a>                                                          | K.YAPIFESDFIQITK.R        | 1 | 2.459  | 0.2482 |   | <a href="#">Q8IYT1</a> |
| Round spermatid basic protein 1 - Homo sapiens (Human)                               |                           |   |        |        |   |                        |
| <a href="#">Q5VWQ0_HUMAN</a>                                                         | K.QENGERTGGVPLIKAPK.R     | 1 | 2.4472 | 0.1388 |   | <a href="#">Q5VWQ0</a> |
| Serum paraoxonase/arylesterase 1 (EC 3.1.1.2) (EC 3.1.8.1) (PON 1) (Serum aryldialk: |                           |   |        |        |   |                        |
| <a href="#">PON1_HUMAN</a>                                                           | K.IFFYDSENP PASEVLR.I     | 1 | 5.35   | 0.6121 |   | <a href="#">P27169</a> |
| Synapsin-1 (Synapsin I) (Brain protein 4.1) - Homo sapiens (Human)                   |                           |   |        |        |   |                        |
| <a href="#">SYN1_HUMAN</a>                                                           | K.MAQALPRQR.Q             | 1 | 2.4339 | 0.2295 | 1 | <a href="#">P17600</a> |
| U3 small nucleolar RNA-associated protein 15 homolog - Homo sapiens (Human)          |                           |   |        |        |   |                        |
| <a href="#">UTP15_HUMAN</a>                                                          | K.NYMKQRDDILINR.P         | 1 | 2.5718 | 0.0921 |   | <a href="#">Q8TED0</a> |

95

25

## Complement C4-A precursor (Acidic complement C4) [Contains: Complement C4 beta

|                            |                    |   |        |        |   |                        |
|----------------------------|--------------------|---|--------|--------|---|------------------------|
| <a href="#">CO4A_HUMAN</a> | R.GLQDEDGYRMK.F    | 1 | 2.4071 | 0.3129 | 3 | <a href="#">P0C0L4</a> |
| <a href="#">CO4A_HUMAN</a> | R.GQIVFM*NR.E      | 1 | 2.492  | 0.3471 | 3 | <a href="#">P0C0L4</a> |
| <a href="#">CO4A_HUMAN</a> | R.GQIVFMNR.E       | 1 | 2.4333 | 0.3426 | 3 | <a href="#">P0C0L4</a> |
| <a href="#">CO4A_HUMAN</a> | R.TTNIQGINLLFSSR.R | 1 | 4.7631 | 0.5765 | 3 | <a href="#">P0C0L4</a> |
| <a href="#">CO4A_HUMAN</a> | R.TYNVLD M*K.N     | 1 | 2.694  | 0.5051 | 3 | <a href="#">P0C0L4</a> |
| <a href="#">CO4A_HUMAN</a> | R.VFALDQK.M        | 1 | 2.4999 | 0.2052 | 3 | <a href="#">P0C0L4</a> |
| <a href="#">CO4A_HUMAN</a> | R.GLQDEDGYRM*K.F   | 1 | 2.7311 | 0.4259 | 3 | <a href="#">P0C0L4</a> |
| <a href="#">CO4A_HUMAN</a> | K.LNM*GITDLQGLR.L  | 1 | 3.4167 | 0.4309 | 3 | <a href="#">P0C0L4</a> |
| <a href="#">CO4A_HUMAN</a> | R.TYNVLD M.K.N     | 1 | 3.4537 | 0.455  | 3 | <a href="#">P0C0L4</a> |
| <a href="#">CO4A_HUMAN</a> | R.FGLLDE DGK.K.T   | 1 | 3.1154 | 0.3077 | 3 | <a href="#">P0C0L4</a> |
| <a href="#">CO4A_HUMAN</a> | R.EMSGSPASGIPVK.V  | 1 | 2.6469 | 0.1944 | 3 | <a href="#">P0C0L4</a> |
| <a href="#">CO4A_HUMAN</a> | R.EAPKVV EEQESR.V  | 1 | 2.5727 | 0.5202 | 3 | <a href="#">P0C0L4</a> |
| <a href="#">CO4A_HUMAN</a> | K.VVEEQESR.V       | 6 | 3.0124 | 0.4802 | 3 | <a href="#">P0C0L4</a> |

|                            |                         |   |        |        |   |                        |
|----------------------------|-------------------------|---|--------|--------|---|------------------------|
| <a href="#">CO4A_HUMAN</a> | K.VLSLAQEQVGGSPK.L      | 1 | 4.6859 | 0.5801 | 3 | <a href="#">P0C0L4</a> |
| <a href="#">CO4A_HUMAN</a> | K.LNMGITDLQGLR.L        | 1 | 2.9992 | 0.4069 | 3 | <a href="#">P0C0L4</a> |
| <a href="#">CO4A_HUMAN</a> | R.VGDTLNLNLR.A          | 1 | 3.0392 | 0.4279 | 3 | <a href="#">P0C0L4</a> |
| <a href="#">CO4A_HUMAN</a> | K.AEFQDALEK.L           | 2 | 3.0637 | 0.3898 | 3 | <a href="#">P0C0L4</a> |
| <a href="#">CO4A_HUMAN</a> | R.VTASDPLDTLGSEGALSPGG\ | 1 | 4.7875 | 0.4026 | 3 | <a href="#">P0C0L4</a> |
| <a href="#">CO4A_HUMAN</a> | K.LVNGQSHISLSK.A        | 1 | 3.5957 | 0.3682 | 3 | <a href="#">P0C0L4</a> |

### Ceruloplasmin precursor (EC 1.16.3.1) (Ferroxidase) - Homo sapiens (Human)

|                            |                          |   |        |        |  |                        |
|----------------------------|--------------------------|---|--------|--------|--|------------------------|
| <a href="#">CERU_HUMAN</a> | K.NNEGTYYSNPNPQSR.S      | 1 | 4.5834 | 0.6147 |  | <a href="#">P00450</a> |
| <a href="#">CERU_HUMAN</a> | R.RQSEDSTFYLGGER.T       | 1 | 3.9292 | 0.4297 |  | <a href="#">P00450</a> |
| <a href="#">CERU_HUMAN</a> | R.QSEDSTFYLGGER.T        | 1 | 3.1714 | 0.3961 |  | <a href="#">P00450</a> |
| <a href="#">CERU_HUMAN</a> | R.MFTTAPDQVDKEDEDFQESN   | 1 | 3.5121 | 0.4899 |  | <a href="#">P00450</a> |
| <a href="#">CERU_HUMAN</a> | R.M*FTTAPDQVDKEDEDFQESI  | 1 | 3.9187 | 0.5423 |  | <a href="#">P00450</a> |
| <a href="#">CERU_HUMAN</a> | R.HYYIAAEEIWNYPAGSIDIFTK | 1 | 4.1791 | 0.4869 |  | <a href="#">P00450</a> |
| <a href="#">CERU_HUMAN</a> | R.GVYSSDVFDFPGTYQTLEMF   | 2 | 4.4138 | 0.6055 |  | <a href="#">P00450</a> |
| <a href="#">CERU_HUMAN</a> | R.GPEEEHLGILGPVIWAIEVGD  | 1 | 5.9732 | 0.3634 |  | <a href="#">P00450</a> |
| <a href="#">CERU_HUMAN</a> | R.EYTDASFTNRK.E          | 1 | 2.6647 | 0.1886 |  | <a href="#">P00450</a> |
| <a href="#">CERU_HUMAN</a> | R.TTIEKPVWLGFGLPIIK.A    | 1 | 3.4838 | 0.4146 |  | <a href="#">P00450</a> |
| <a href="#">CERU_HUMAN</a> | K.VNKDDEEFIESNK.M        | 1 | 4.3337 | 0.3829 |  | <a href="#">P00450</a> |
| <a href="#">CERU_HUMAN</a> | K.MYYSAVDPTK.D           | 1 | 2.9549 | 0.5316 |  | <a href="#">P00450</a> |
| <a href="#">CERU_HUMAN</a> | K.NLASRPYTFHSHGITYYK.E   | 1 | 4.3157 | 0.5078 |  | <a href="#">P00450</a> |
| <a href="#">CERU_HUMAN</a> | K.MYYSAVDPTKDIFTGLIGPMK  | 1 | 3.9247 | 0.4754 |  | <a href="#">P00450</a> |
| <a href="#">CERU_HUMAN</a> | K.M*YYSAVDPTKDIFTGLIGPMK | 1 | 4.6273 | 0.3653 |  | <a href="#">P00450</a> |
| <a href="#">CERU_HUMAN</a> | K.KALYLQYTDIFR.T         | 1 | 4.2346 | 0.5446 |  | <a href="#">P00450</a> |
| <a href="#">CERU_HUMAN</a> | K.HYYIGIETTWDYASDHGEK.K  | 1 | 5.6986 | 0.5691 |  | <a href="#">P00450</a> |
| <a href="#">CERU_HUMAN</a> | K.GAYPLSIEPIGVR.F        | 1 | 3.282  | 0.5201 |  | <a href="#">P00450</a> |
| <a href="#">CERU_HUMAN</a> | K.DVDKEFYLFPTVFDENESLLLI | 1 | 4.5865 | 0.5302 |  | <a href="#">P00450</a> |
| <a href="#">CERU_HUMAN</a> | K.ALYLQYTDIFR.T          | 1 | 3.832  | 0.5919 |  | <a href="#">P00450</a> |
| <a href="#">CERU_HUMAN</a> | R.EYTDASFTNRK            | 1 | 2.6524 | 0.4441 |  | <a href="#">P00450</a> |
| <a href="#">CERU_HUMAN</a> | K.LISVDTEHSNIYLNQNGPDR.I | 1 | 3.7583 | 0.3084 |  | <a href="#">P00450</a> |

### Inter-alpha-trypsin inhibitor heavy chain H1 precursor (ITI heavy chain H1) (Inter-alpha-

|                             |                         |   |        |        |   |                        |
|-----------------------------|-------------------------|---|--------|--------|---|------------------------|
| <a href="#">ITIH1_HUMAN</a> | R.KAAISGENAGLVR.A       | 1 | 3.8053 | 0.4364 |   | <a href="#">P19827</a> |
| <a href="#">ITIH1_HUMAN</a> | K.AAISGENAGLVR.A        | 2 | 3.7241 | 0.5011 |   | <a href="#">P19827</a> |
| <a href="#">ITIH1_HUMAN</a> | K.GSLVQASEANLQAAQDFVR.C | 2 | 5.9813 | 0.6263 |   | <a href="#">P19827</a> |
| <a href="#">ITIH1_HUMAN</a> | K.LDAQASFLPK.E          | 1 | 3.4022 | 0.3892 |   | <a href="#">P19827</a> |
| <a href="#">ITIH1_HUMAN</a> | K.QYYEGSEIVVAGR.I       | 2 | 3.9365 | 0.4775 | 1 | <a href="#">P19827</a> |
| <a href="#">ITIH1_HUMAN</a> | R.IYEDHDATQQLQGFYSQVAK. | 1 | 3.6277 | 0.379  | 1 | <a href="#">P19827</a> |
| <a href="#">ITIH1_HUMAN</a> | R.LWAYLTIQELLAK.R       | 1 | 4.9746 | 0.6001 | 1 | <a href="#">P19827</a> |
| <a href="#">ITIH1_HUMAN</a> | R.QAVDTAVDGVFIR.S       | 1 | 4.1716 | 0.3856 |   | <a href="#">P19827</a> |
| <a href="#">ITIH1_HUMAN</a> | R.EVAFDLEIPK.T          | 1 | 2.9459 | 0.3283 |   | <a href="#">P19827</a> |

### Inter-alpha-trypsin inhibitor heavy chain H2 precursor (ITI heavy chain H2) (Inter-alpha-

|                             |                   |   |        |        |   |                        |
|-----------------------------|-------------------|---|--------|--------|---|------------------------|
| <a href="#">ITIH2_HUMAN</a> | R.SSALDMENFR.T    | 1 | 3.0546 | 0.3267 | 2 | <a href="#">P19823</a> |
| <a href="#">ITIH2_HUMAN</a> | R.LSNENHGIAQR.I   | 1 | 4.061  | 0.4168 | 1 | <a href="#">P19823</a> |
| <a href="#">ITIH2_HUMAN</a> | R.TWRNDLISATK.T   | 1 | 2.5672 | 0.1646 | 1 | <a href="#">P19823</a> |
| <a href="#">ITIH2_HUMAN</a> | R.TEVNVLPKAK.V    | 1 | 2.598  | 0.4778 | 2 | <a href="#">P19823</a> |
| <a href="#">ITIH2_HUMAN</a> | R.SSALDM*ENFR.T   | 1 | 2.6962 | 0.3241 | 2 | <a href="#">P19823</a> |
| <a href="#">ITIH2_HUMAN</a> | R.MATTM*IQSK.V    | 1 | 2.8153 | 0.4635 | 2 | <a href="#">P19823</a> |
| <a href="#">ITIH2_HUMAN</a> | R.IYGNQDTSSQLK.K  | 1 | 3.4642 | 0.4347 | 1 | <a href="#">P19823</a> |
| <a href="#">ITIH2_HUMAN</a> | R.IYGNQDTSSQLKK.F | 1 | 4.2318 | 0.4001 | 1 | <a href="#">P19823</a> |
| <a href="#">ITIH2_HUMAN</a> | K.FYNQVSTPLLR.N   | 1 | 2.8481 | 0.4364 | 1 | <a href="#">P19823</a> |

|                             |                         |   |        |        |   |                        |
|-----------------------------|-------------------------|---|--------|--------|---|------------------------|
| <a href="#">ITIH2_HUMAN</a> | R.AEDHFSVIDFNQNR.T      | 1 | 4.4015 | 0.2253 | 1 | <a href="#">P19823</a> |
| <a href="#">ITIH2_HUMAN</a> | K.VVNNSPQPQNVFVDVQIPK.G | 1 | 5.2367 | 0.5132 | 2 | <a href="#">P19823</a> |
| <a href="#">ITIH2_HUMAN</a> | K.IQPSSGGTNINEALLR.A    | 1 | 2.6386 | 0.3213 | 1 | <a href="#">P19823</a> |

9

Apolipoprotein A-I precursor (Apo-AI) (ApoA-I) [Contains: Apolipoprotein A-I(1-242)] - H

|                             |                      |   |        |        |  |                        |
|-----------------------------|----------------------|---|--------|--------|--|------------------------|
| <a href="#">APOA1_HUMAN</a> | K.VQPYLDDFQKK.W      | 1 | 2.6372 | 0.1761 |  | <a href="#">P02647</a> |
| <a href="#">APOA1_HUMAN</a> | R.EQLGPVTQEFWDNLEK.E | 1 | 3.5264 | 0.5807 |  | <a href="#">P02647</a> |
| <a href="#">APOA1_HUMAN</a> | R.DYVSQFEGSALGK.Q    | 2 | 4.1499 | 0.6571 |  | <a href="#">P02647</a> |
| <a href="#">APOA1_HUMAN</a> | K.WQEEM*ELYR.Q       | 1 | 2.5422 | 0.4107 |  | <a href="#">P02647</a> |
| <a href="#">APOA1_HUMAN</a> | K.ATEHLSTLSEK.A      | 1 | 2.9371 | 0.4577 |  | <a href="#">P02647</a> |
| <a href="#">APOA1_HUMAN</a> | K.LLDNWDSVTSTFSK.L   | 2 | 4.348  | 0.5849 |  | <a href="#">P02647</a> |
| <a href="#">APOA1_HUMAN</a> | R.THLAPYSDEL.R       | 1 | 2.4994 | 0.5258 |  | <a href="#">P02647</a> |

Complement C3 precursor [Contains: Complement C3 beta chain; Complement C3 alp]

|                           |                          |   |        |        |  |                        |
|---------------------------|--------------------------|---|--------|--------|--|------------------------|
| <a href="#">CO3_HUMAN</a> | R.IPIEDGSGEVVLSR.K       | 1 | 2.7685 | 0.4295 |  | <a href="#">P01024</a> |
| <a href="#">CO3_HUMAN</a> | K.SGSDEVQVGQR.T          | 1 | 3.7891 | 0.3803 |  | <a href="#">P01024</a> |
| <a href="#">CO3_HUMAN</a> | R.SEETKENEGFTVTAEGK.G    | 1 | 4.1686 | 0.4056 |  | <a href="#">P01024</a> |
| <a href="#">CO3_HUMAN</a> | K.TGLQEVEVK.A            | 1 | 2.6887 | 0.3767 |  | <a href="#">P01024</a> |
| <a href="#">CO3_HUMAN</a> | R.TKKQELSEAEQATR.T       | 1 | 4.0671 | 0.5069 |  | <a href="#">P01024</a> |
| <a href="#">CO3_HUMAN</a> | K.VLLDGVQNP.R            | 1 | 3.426  | 0.436  |  | <a href="#">P01024</a> |
| <a href="#">CO3_HUMAN</a> | R.LVAYYTLIGASGQR.E       | 1 | 3.4572 | 0.4591 |  | <a href="#">P01024</a> |
| <a href="#">CO3_HUMAN</a> | K.QELSEAEQATR.T          | 1 | 2.4884 | 0.4596 |  | <a href="#">P01024</a> |
| <a href="#">CO3_HUMAN</a> | R.ILLQGTPVAQM*TEDAVIDAER | 1 | 4.5116 | 0.613  |  | <a href="#">P01024</a> |

8

Serum albumin precursor - Homo sapiens (Human)

|                            |                      |   |        |        |   |                        |
|----------------------------|----------------------|---|--------|--------|---|------------------------|
| <a href="#">ALBU_HUMAN</a> | K.KVPQVSTPTLVEVSR.N  | 1 | 3.2926 | 0.3997 | 2 | <a href="#">P02768</a> |
| <a href="#">ALBU_HUMAN</a> | R.RHPYFYAPPELLFFAK.R | 1 | 3.7014 | 0.5109 | 1 | <a href="#">P02768</a> |
| <a href="#">ALBU_HUMAN</a> | K.VPQVSTPTLVEVSR.N   | 1 | 3.2986 | 0.5401 | 2 | <a href="#">P02768</a> |
| <a href="#">ALBU_HUMAN</a> | K.KQTALVELVK.H       | 1 | 2.6422 | 0.3424 | 2 | <a href="#">P02768</a> |
| <a href="#">ALBU_HUMAN</a> | K.AVMDDFAAFVEK.C     | 2 | 3.7478 | 0.5739 | 2 | <a href="#">P02768</a> |
| <a href="#">ALBU_HUMAN</a> | K.AVM*DDFAAFVEK.C    | 1 | 3.4831 | 0.635  | 2 | <a href="#">P02768</a> |
| <a href="#">ALBU_HUMAN</a> | R.RHPDYSVLLLR.L      | 1 | 3.8562 | 0.3682 | 1 | <a href="#">P02768</a> |

5

Serum amyloid P-component precursor (SAP) (9.5S alpha-1-glycoprotein) [Contains: S

|                            |                   |   |        |        |  |                        |
|----------------------------|-------------------|---|--------|--------|--|------------------------|
| <a href="#">SAMP_HUMAN</a> | K.IVLGQEQDSYGGK.F | 1 | 3.9718 | 0.4492 |  | <a href="#">P02743</a> |
| <a href="#">SAMP_HUMAN</a> | R.AYSLFSYNTQGR.D  | 1 | 4.04   | 0.4496 |  | <a href="#">P02743</a> |
| <a href="#">SAMP_HUMAN</a> | R.DNELLVYK.E      | 1 | 2.4053 | 0.3164 |  | <a href="#">P02743</a> |
| <a href="#">SAMP_HUMAN</a> | R.QGYFVEAQPK.I    | 1 | 2.5672 | 0.4379 |  | <a href="#">P02743</a> |
| <a href="#">SAMP_HUMAN</a> | R.VGEYSLYIGR.H    | 1 | 3.6042 | 0.4342 |  | <a href="#">P02743</a> |

3

Complement C1s subcomponent precursor (EC 3.4.21.42) (C1 esterase) [Contains: Cc

|                           |                    |   |        |        |  |                        |
|---------------------------|--------------------|---|--------|--------|--|------------------------|
| <a href="#">C1S_HUMAN</a> | R.TNFDNDIALVR.L    | 1 | 3.5425 | 0.3835 |  | <a href="#">P09871</a> |
| <a href="#">C1S_HUMAN</a> | K.GDSGGAFVQDPNDK.T | 1 | 4.3845 | 0.546  |  | <a href="#">P09871</a> |
| <a href="#">C1S_HUMAN</a> | K.TMQENSTPRED.-    | 1 | 3.3437 | 0.5281 |  | <a href="#">P09871</a> |

Hypothetical protein - Homo sapiens (Human)

|                              |                        |   |        |        |    |                        |
|------------------------------|------------------------|---|--------|--------|----|------------------------|
| <a href="#">A0A5E5_HUMAN</a> | K.VDNALQSGNSQESVTEQDSK | 1 | 5.5712 | 0.6261 | 20 | <a href="#">A0A5E5</a> |
| <a href="#">A0A5E5_HUMAN</a> | R.TVAAPSVFIFPPSDEQLK.S | 2 | 3.917  | 0.5906 | 21 | <a href="#">A0A5E5</a> |

Hypothetical protein DKFZp686O01196 - Homo sapiens (Human)

|                              |                       |   |        |        |    |                        |
|------------------------------|-----------------------|---|--------|--------|----|------------------------|
| <a href="#">Q6N094_HUMAN</a> | K.GPSVFPLAPSSK.S      | 1 | 2.8869 | 0.5022 | 20 | <a href="#">Q6N094</a> |
| <a href="#">Q6N094_HUMAN</a> | K.TTPPVLDSDGSFFLYSK.L | 1 | 3.4781 | 0.3901 | 19 | <a href="#">Q6N094</a> |
| <a href="#">Q6N094_HUMAN</a> | K.FNWYVDGVEVHNAK.T    | 1 | 3.2459 | 0.4806 | 20 | <a href="#">Q6N094</a> |

Ig alpha-2 chain C region - Homo sapiens (Human)

|                             |                       |   |        |        |    |                        |
|-----------------------------|-----------------------|---|--------|--------|----|------------------------|
| <a href="#">IGHA2_HUMAN</a> | R.QEPSQGTTFVAVTSILR.V | 1 | 3.9947 | 0.5029 | 21 | <a href="#">P01877</a> |
| <a href="#">IGHA2_HUMAN</a> | R.WLQGSQELPR.E        | 1 | 3.0348 | 0.3545 | 23 | <a href="#">P01877</a> |
| <a href="#">IGHA2_HUMAN</a> | R.DASGATFTWTPSSGK.S   | 1 | 3.496  | 0.5053 | 10 | <a href="#">P01877</a> |

IGHM protein - Homo sapiens (Human)

|                              |                     |   |        |        |   |                        |
|------------------------------|---------------------|---|--------|--------|---|------------------------|
| <a href="#">Q6GMY2_HUMAN</a> | K.QVGSVTTDQVQAEAK.E | 1 | 4.418  | 0.5227 | 4 | <a href="#">Q6GMY2</a> |
| <a href="#">Q6GMY2_HUMAN</a> | K.YAATSQVLLPSK.D    | 2 | 3.7846 | 0.4407 | 3 | <a href="#">Q6GMY2</a> |

IGLV2-14 protein - Homo sapiens (Human)

|                              |                     |   |        |        |    |                        |
|------------------------------|---------------------|---|--------|--------|----|------------------------|
| <a href="#">A0A5C9_HUMAN</a> | K.AGVETTPSK.Q       | 2 | 2.5807 | 0.377  | 17 | <a href="#">A0A5C9</a> |
| <a href="#">A0A5C9_HUMAN</a> | K.YAASSYLSLTPEQWK.S | 1 | 4.8145 | 0.6578 | 29 | <a href="#">A0A5C9</a> |

Inter-alpha-trypsin inhibitor heavy chain H3 precursor (ITI heavy chain H3) (Inter-alpha-

|                             |                  |   |        |        |  |                        |
|-----------------------------|------------------|---|--------|--------|--|------------------------|
| <a href="#">ITIH3_HUMAN</a> | K.GM*TNINDGLLR.G | 1 | 3.0132 | 0.5054 |  | <a href="#">Q06033</a> |
| <a href="#">ITIH3_HUMAN</a> | R.LVDEDM*NSFK.A  | 1 | 3.5135 | 0.3997 |  | <a href="#">Q06033</a> |
| <a href="#">ITIH3_HUMAN</a> | R.LVDEDMNSFK.A   | 1 | 3.1914 | 0.4437 |  | <a href="#">Q06033</a> |

Lumican precursor (Keratan sulfate proteoglycan lumican) (KSPG lumican) - Homo sap

|                           |                 |   |        |        |  |                        |
|---------------------------|-----------------|---|--------|--------|--|------------------------|
| <a href="#">LUM_HUMAN</a> | K.ISNIPDEYFK.R  | 1 | 3.2376 | 0.4606 |  | <a href="#">P51884</a> |
| <a href="#">LUM_HUMAN</a> | K.SLEDLQLTHNK.I | 1 | 3.3638 | 0.4227 |  | <a href="#">P51884</a> |
| <a href="#">LUM_HUMAN</a> | R.FNALQYLR.L    | 1 | 2.6056 | 0.3009 |  | <a href="#">P51884</a> |

2

Alpha-2-HS-glycoprotein precursor (Fetuin-A) (Alpha-2-Z-globulin) (Ba-alpha-2-glycopr

|                             |                       |   |        |        |  |                        |
|-----------------------------|-----------------------|---|--------|--------|--|------------------------|
| <a href="#">FETUA_HUMAN</a> | R.HTFMGVSLGSPSGEVSHPR | 1 | 4.6129 | 0.6253 |  | <a href="#">P02765</a> |
| <a href="#">FETUA_HUMAN</a> | K.HTLNQIDEVK.V        | 1 | 3.5472 | 0.3899 |  | <a href="#">P02765</a> |

Apolipoprotein A-II precursor (ApoA-II) (ApoA-II) [Contains: Apolipoprotein A-II(1-76)] -

|                             |                 |   |        |        |  |                        |
|-----------------------------|-----------------|---|--------|--------|--|------------------------|
| <a href="#">APOA2_HUMAN</a> | K.SPELQAEAK.S   | 1 | 2.8151 | 0.3461 |  | <a href="#">P02652</a> |
| <a href="#">APOA2_HUMAN</a> | K.VKSPELQAEAK.S | 1 | 3.4516 | 0.2175 |  | <a href="#">P02652</a> |

Clusterin precursor (Complement-associated protein SP-40,40) (Complement cytotoxic

|                            |                         |   |        |        |   |                        |
|----------------------------|-------------------------|---|--------|--------|---|------------------------|
| <a href="#">CLUS_HUMAN</a> | R.VTTVASHTSDSDVPSGVTEV\ | 1 | 3.3538 | 0.2748 |   | <a href="#">P10909</a> |
| <a href="#">CLUS_HUMAN</a> | R.ELDESLQVAER.L         | 1 | 2.9854 | 0.4245 | 1 | <a href="#">P10909</a> |

Haptoglobin-related protein precursor - Homo sapiens (Human)

|                            |                    |   |        |        |   |                        |
|----------------------------|--------------------|---|--------|--------|---|------------------------|
| <a href="#">HPTR_HUMAN</a> | R.VGYVSGWGQSDNFK.L | 1 | 4.5866 | 0.5893 |   | <a href="#">P00739</a> |
| <a href="#">HPTR_HUMAN</a> | R.TEGDGVYTLNDK.K   | 1 | 2.5299 | 0.1702 | 2 | <a href="#">P00739</a> |

Ig mu heavy chain disease protein (BOT) - Homo sapiens (Human)

|                            |                      |   |        |        |   |                        |
|----------------------------|----------------------|---|--------|--------|---|------------------------|
| <a href="#">MUCB_HUMAN</a> | K.GVALHRPDVYLLPPAR.E | 1 | 3.9999 | 0.3893 | 5 | <a href="#">P04220</a> |
| <a href="#">MUCB_HUMAN</a> | K.LICQATGFSPR.Q      | 1 | 3.368  | 0.4031 | 5 | <a href="#">P04220</a> |

Immunoglobulin J chain - Homo sapiens (Human)

|                           |                    |   |        |        |  |                        |
|---------------------------|--------------------|---|--------|--------|--|------------------------|
| <a href="#">IGJ_HUMAN</a> | R.IIRSEDPNEDIVER.N | 1 | 4.1415 | 0.3555 |  | <a href="#">P01591</a> |
| <a href="#">IGJ_HUMAN</a> | R.SSEDPNEDIVER.N   | 1 | 3.0844 | 0.3986 |  | <a href="#">P01591</a> |

Kininogen-1 precursor (Alpha-2-thiol proteinase inhibitor) [Contains: Kininogen-1 heavy

|                            |                    |   |        |        |  |                        |
|----------------------------|--------------------|---|--------|--------|--|------------------------|
| <a href="#">KNG1_HUMAN</a> | K.YNSQNSNNQFVLYR.I | 1 | 4.3897 | 0.4959 |  | <a href="#">P01042</a> |
| <a href="#">KNG1_HUMAN</a> | K.TVGSDFYYSFK.Y    | 1 | 3.4538 | 0.5855 |  | <a href="#">P01042</a> |

Myosin-reactive immunoglobulin heavy chain variable region (Fragment) - Homo sapien

|                               |                 |   |        |        |   |                         |
|-------------------------------|-----------------|---|--------|--------|---|-------------------------|
| <a href="#">Q9JUL94_HUMAN</a> | -EVQLVESGAEVK.K | 2 | 4.1458 | 0.4717 | 2 | <a href="#">Q9JUL94</a> |
|-------------------------------|-----------------|---|--------|--------|---|-------------------------|

Serum paraoxonase/arylesterase 1 (EC 3.1.1.2) (EC 3.1.8.1) (PON 1) (Serum aryldialk

|                            |                      |   |        |       |  |                        |
|----------------------------|----------------------|---|--------|-------|--|------------------------|
| <a href="#">PON1_HUMAN</a> | K.IFFYDSENPPASEVLR.I | 2 | 5.6229 | 0.621 |  | <a href="#">P27169</a> |
|----------------------------|----------------------|---|--------|-------|--|------------------------|

Vitronectin precursor (Serum-spreading factor) (S-protein) (V75) [Contains: Vitronectin

|                            |                  |   |        |        |  |                        |
|----------------------------|------------------|---|--------|--------|--|------------------------|
| <a href="#">VTNC_HUMAN</a> | R.IYISGMAPR.P    | 1 | 2.475  | 0.3139 |  | <a href="#">P04004</a> |
| <a href="#">VTNC_HUMAN</a> | R.FEDGVLDPDYPR.N | 1 | 3.1655 | 0.4206 |  | <a href="#">P04004</a> |

1

AMBP protein precursor [Contains: Alpha-1-microglobulin (Protein HC) (Complex-formi

|                            |                  |   |        |        |  |                        |
|----------------------------|------------------|---|--------|--------|--|------------------------|
| <a href="#">AMBP_HUMAN</a> | R.AFIQLWAFDAVK.G | 1 | 4.3525 | 0.5211 |  | <a href="#">P02760</a> |
|----------------------------|------------------|---|--------|--------|--|------------------------|



|                                                                                           |                              |                        |   |        |        |    |                        |
|-------------------------------------------------------------------------------------------|------------------------------|------------------------|---|--------|--------|----|------------------------|
| Apolipoprotein(a) precursor (EC 3.4.21.-) (Apo(a)) (Lp(a)) - Homo sapiens (Human)         | <a href="#">APOA_HUMAN</a>   | R.GTYSTTVTGR.T         | 1 | 2.4154 | 0.5344 | 39 | <a href="#">P08519</a> |
| Cadherin-20 precursor - Homo sapiens (Human)                                              | <a href="#">CAD20_HUMAN</a>  | K.IQDINDNEPK.F         | 1 | 2.9307 | 0.1572 | 2  | <a href="#">Q9HBT6</a> |
| Carboxypeptidase N subunit 2 precursor (Carboxypeptidase N polypeptide 2) (Carboxy        | <a href="#">CPN2_HUMAN</a>   | K.AGGSWDLAVQER.A       | 1 | 2.8187 | 0.4298 |    | <a href="#">P22792</a> |
| CDNA FLJ39060 fis, clone NT2RP7013729 (Novel protein) - Homo sapiens (Human)              | <a href="#">Q8N8P6_HUMAN</a> | R.HSASVPM*ATGANLETKDE1 | 1 | 2.6044 | 0.0904 |    | <a href="#">Q8N8P6</a> |
| CDNA FLJ40176 fis, clone TESTI2017102. (Fragment) - Homo sapiens (Human)                  | <a href="#">Q8N800_HUMAN</a> | K.QLKAHLLQKEEK.D       | 1 | 2.5621 | 0.196  |    | <a href="#">Q8N800</a> |
| Ciliary dynein heavy chain 7 - Homo sapiens (Human)                                       | <a href="#">Q8WXX0_HUMAN</a> | K.TQTM*RGSPFIKPYEK.Q   | 1 | 2.8472 | 0.2339 |    | <a href="#">Q8WXX0</a> |
| Complement component C9 precursor [Contains: Complement component C9a; Compl              | <a href="#">CO9_HUMAN</a>    | R.VVEESELAR.T          | 1 | 2.6919 | 0.5073 |    | <a href="#">P02748</a> |
| Fibulin-1 precursor - Homo sapiens (Human)                                                | <a href="#">FBLN1_HUMAN</a>  | R.SAATLQQEKDQTVR.C     | 1 | 3.201  | 0.3533 |    | <a href="#">P23142</a> |
| Ig kappa chain V-III region VG precursor (Fragment) - Homo sapiens (Human)                | <a href="#">KV309_HUMAN</a>  | R.LLIYDASNR.A          | 1 | 2.8136 | 0.4602 | 1  | <a href="#">P04433</a> |
| IGHA1 protein - Homo sapiens (Human)                                                      | <a href="#">Q8N5K4_HUMAN</a> | R.DASGVFTFTWTPSSGK.S   | 1 | 4.8828 | 0.5256 | 12 | <a href="#">Q8N5K4</a> |
| Inter-alpha-trypsin inhibitor heavy chain H4 precursor (ITI heavy chain H4) (Inter-alpha- | <a href="#">ITI4_HUMAN</a>   | K.GSEMVVAGK.L          | 1 | 2.5364 | 0.2952 | 1  | <a href="#">Q14624</a> |
| Latrophilin-2 (Fragment) - Homo sapiens (Human)                                           | <a href="#">Q9UJ49_HUMAN</a> | -.MTGNYLLTNPLLR.P      | 1 | 2.8956 | 0.3433 |    | <a href="#">Q9UJ49</a> |
| Nesprin-1 (Nuclear envelope spectrin repeat protein 1) (Synaptic nuclear envelope prot    | <a href="#">SYNE1_HUMAN</a>  | R.LQQILNFQNDLK.V       | 1 | 2.5953 | 0.1957 |    | <a href="#">Q8NF91</a> |
| Olfactory receptor 17-1 - Homo sapiens (Human)                                            | <a href="#">Q9UL14_HUMAN</a> | R.GQGRPEKGAQM*EGCTPR.G | 1 | 3.2623 | 0.2951 |    | <a href="#">Q9UL14</a> |
| Prothrombin precursor (EC 3.4.21.5) (Coagulation factor II) [Contains: Activation peptid  | <a href="#">THRB_HUMAN</a>   | R.TATSEYQTFNPR.T       | 1 | 3.0985 | 0.558  |    | <a href="#">P00734</a> |
| Signal peptide peptidase-like 2B (EC 3.4.23.-) (Protein SPP-like 2B) (Protein SPPL2b)     | <a href="#">PSL1_HUMAN</a>   | R.TVRAALYAPK.E         | 1 | 2.5145 | 0.2658 |    | <a href="#">Q8TCT7</a> |
| Sodium bicarbonate cotransporter 3 (Sodium bicarbonate cotransporter 2) (Sodium bic       | <a href="#">S4A7_HUMAN</a>   | R.TGLSASNLSLR.G        | 1 | 2.9495 | 0.0945 |    | <a href="#">Q9Y6M7</a> |
| Transcription elongation factor B polypeptide 1 (RNA polymerase II transcription factor   | <a href="#">ELOC_HUMAN</a>   | K.AMLSGPGQFAENETNEVNFR | 1 | 2.861  | 0.09   |    | <a href="#">Q15369</a> |
| Tribbles homolog 3 (TRB-3) (Neuronal cell death-inducible putative kinase) (p65-interac   | <a href="#">TRIB3_HUMAN</a>  | K.VYPVQEALAVLEPYAR.L   | 1 | 2.8921 | 0.0852 |    | <a href="#">Q96RU7</a> |
| Zinc finger CCHC domain-containing protein 11 - Homo sapiens (Human)                      | <a href="#">ZCH11_HUMAN</a>  | R.M*DDFQLKGIVVEEKFKV.W | 1 | 2.6587 | 0.185  | 1  | <a href="#">Q5TAX3</a> |

Ceruloplasmin precursor (EC 1.16.3.1) (Ferroxidase) - Homo sapiens (Human)

|                            |                         |   |        |        |  |                        |
|----------------------------|-------------------------|---|--------|--------|--|------------------------|
| <a href="#">CERU_HUMAN</a> | R.GVYSSDVDFIFPGTYQTLEMF | 1 | 4.5017 | 0.5373 |  | <a href="#">P00450</a> |
| <a href="#">CERU_HUMAN</a> | R.QSEDSTFYLGERT         | 1 | 3.1777 | 0.4158 |  | <a href="#">P00450</a> |
| <a href="#">CERU_HUMAN</a> | R.EYTDASFTNR.K          | 1 | 2.8435 | 0.4899 |  | <a href="#">P00450</a> |
| <a href="#">CERU_HUMAN</a> | K.NNEGTYSPNYPQSR.S      | 1 | 4.3791 | 0.5262 |  | <a href="#">P00450</a> |
| <a href="#">CERU_HUMAN</a> | K.NLASRPYTFHSHGITYYK.E  | 1 | 3.3318 | 0.3666 |  | <a href="#">P00450</a> |
| <a href="#">CERU_HUMAN</a> | K.MYYSAVDPTK.D          | 1 | 2.8316 | 0.5446 |  | <a href="#">P00450</a> |

|                            |                          |   |        |        |  |                        |
|----------------------------|--------------------------|---|--------|--------|--|------------------------|
| <a href="#">CERU_HUMAN</a> | R.M*FTTAPDQVDEDFQESI     | 1 | 3.6194 | 0.5255 |  | <a href="#">P00450</a> |
| <a href="#">CERU_HUMAN</a> | K.KALYLQYTDETFR.T        | 1 | 3.9241 | 0.4069 |  | <a href="#">P00450</a> |
| <a href="#">CERU_HUMAN</a> | R.HYYIAAEEIWNYPAGSIDIFTK | 1 | 3.7563 | 0.4767 |  | <a href="#">P00450</a> |
| <a href="#">CERU_HUMAN</a> | K.GAYPLSIEPIGVR.F        | 1 | 2.8385 | 0.5027 |  | <a href="#">P00450</a> |
| <a href="#">CERU_HUMAN</a> | K.DIFTGLIGPMK.I          | 1 | 2.5124 | 0.3608 |  | <a href="#">P00450</a> |
| <a href="#">CERU_HUMAN</a> | K.ALYLQYTDETFR.T         | 1 | 3.7459 | 0.5887 |  | <a href="#">P00450</a> |
| <a href="#">CERU_HUMAN</a> | R.MFTTAPDQVDEDFQESN      | 1 | 3.2052 | 0.4359 |  | <a href="#">P00450</a> |
| <a href="#">CERU_HUMAN</a> | R.GPEEEHLGILGPVIWAEVGD   | 1 | 5.0116 | 0.2546 |  | <a href="#">P00450</a> |

10

Inter-alpha-trypsin inhibitor heavy chain H1 precursor (ITI heavy chain H1) (Inter-alpha-

|                             |                         |   |        |        |   |                        |
|-----------------------------|-------------------------|---|--------|--------|---|------------------------|
| <a href="#">ITIH1_HUMAN</a> | R.LWAYLTIQELLAK.R       | 1 | 4.4657 | 0.579  | 1 | <a href="#">P19827</a> |
| <a href="#">ITIH1_HUMAN</a> | K.AAISGENAGLVR.A        | 1 | 3.4562 | 0.5003 |   | <a href="#">P19827</a> |
| <a href="#">ITIH1_HUMAN</a> | K.GSLVQASEANLQAAQDFVR.C | 2 | 5.7131 | 0.6455 |   | <a href="#">P19827</a> |
| <a href="#">ITIH1_HUMAN</a> | K.LDAQASFLPK.E          | 1 | 3.1268 | 0.3438 |   | <a href="#">P19827</a> |
| <a href="#">ITIH1_HUMAN</a> | K.QYYEGSEIVVAGR.I       | 1 | 3.6842 | 0.4616 | 1 | <a href="#">P19827</a> |
| <a href="#">ITIH1_HUMAN</a> | R.FAHYVVTSSQVVNTANEAR.E | 1 | 3.6668 | 0.3095 |   | <a href="#">P19827</a> |
| <a href="#">ITIH1_HUMAN</a> | R.NHMQYEIVIK.V          | 1 | 2.9186 | 0.3214 |   | <a href="#">P19827</a> |
| <a href="#">ITIH1_HUMAN</a> | R.QAVDTAVDGVFIR.S       | 1 | 2.8834 | 0.3834 |   | <a href="#">P19827</a> |
| <a href="#">ITIH1_HUMAN</a> | R.EVAFDLEIPK.T          | 1 | 2.781  | 0.419  |   | <a href="#">P19827</a> |

7

Inter-alpha-trypsin inhibitor heavy chain H2 precursor (ITI heavy chain H2) (Inter-alpha-

|                             |                         |   |        |        |   |                        |
|-----------------------------|-------------------------|---|--------|--------|---|------------------------|
| <a href="#">ITIH2_HUMAN</a> | R.SSALDMENFR.T          | 1 | 3.0438 | 0.3373 | 2 | <a href="#">P19823</a> |
| <a href="#">ITIH2_HUMAN</a> | R.SSALDM*ENFR.T         | 1 | 2.6937 | 0.3523 | 2 | <a href="#">P19823</a> |
| <a href="#">ITIH2_HUMAN</a> | R.IYGNQDTSSQLK.K        | 1 | 3.5273 | 0.4715 | 1 | <a href="#">P19823</a> |
| <a href="#">ITIH2_HUMAN</a> | K.VVNNSPQPQNVVFDVQIPK.G | 2 | 5.1604 | 0.5597 | 2 | <a href="#">P19823</a> |
| <a href="#">ITIH2_HUMAN</a> | K.IQPSGGTNINEALLR.A     | 2 | 3.5258 | 0.5773 | 1 | <a href="#">P19823</a> |

6

Apolipoprotein A-I precursor (Apo-AI) (ApoA-I) [Contains: Apolipoprotein A-I(1-242)] - H

|                             |                       |   |        |        |  |                        |
|-----------------------------|-----------------------|---|--------|--------|--|------------------------|
| <a href="#">APOA1_HUMAN</a> | K.DSGRDYVSQFEGSALGK.Q | 1 | 4.6894 | 0.356  |  | <a href="#">P02647</a> |
| <a href="#">APOA1_HUMAN</a> | K.WQEEM*ELYR.Q        | 1 | 3.1586 | 0.2961 |  | <a href="#">P02647</a> |
| <a href="#">APOA1_HUMAN</a> | K.VSFLSALEEYTK.K      | 1 | 4.0551 | 0.5126 |  | <a href="#">P02647</a> |
| <a href="#">APOA1_HUMAN</a> | K.LLDNWDSVTSTFSK.L    | 1 | 3.9495 | 0.532  |  | <a href="#">P02647</a> |
| <a href="#">APOA1_HUMAN</a> | K.ATEHLSTLSEK.A       | 1 | 2.7128 | 0.4119 |  | <a href="#">P02647</a> |
| <a href="#">APOA1_HUMAN</a> | R.DYVSQFEGSALGK.Q     | 1 | 4.2544 | 0.6043 |  | <a href="#">P02647</a> |

5

Complement C3 precursor [Contains: Complement C3 beta chain; Complement C3 alpha]

|                           |                           |   |        |        |  |                        |
|---------------------------|---------------------------|---|--------|--------|--|------------------------|
| <a href="#">CO3_HUMAN</a> | K.VQLSNDFDEYIMAIEQTIK.S   | 1 | 3.7883 | 0.3539 |  | <a href="#">P01024</a> |
| <a href="#">CO3_HUMAN</a> | R.ILLQGTPVAQMTEDAVIDAER.I | 1 | 4.3936 | 0.532  |  | <a href="#">P01024</a> |
| <a href="#">CO3_HUMAN</a> | K.SGSDEVQVGQR.T           | 1 | 3.8284 | 0.3151 |  | <a href="#">P01024</a> |
| <a href="#">CO3_HUMAN</a> | R.TKKQELSEAEQATR.T        | 1 | 4.2335 | 0.5286 |  | <a href="#">P01024</a> |
| <a href="#">CO3_HUMAN</a> | R.IPIEDGSGEVVLSR.K        | 1 | 3.7892 | 0.5929 |  | <a href="#">P01024</a> |

Ig mu heavy chain disease protein (BOT) - Homo sapiens (Human)

|                            |                        |   |        |        |   |                        |
|----------------------------|------------------------|---|--------|--------|---|------------------------|
| <a href="#">MUCB_HUMAN</a> | K.QVSGVTTDEVEAEAK.E    | 1 | 2.9155 | 0.4035 |   | <a href="#">P04220</a> |
| <a href="#">MUCB_HUMAN</a> | K.GVALHRPDVYLLPPAR.E   | 1 | 3.9153 | 0.4453 | 5 | <a href="#">P04220</a> |
| <a href="#">MUCB_HUMAN</a> | R.GQPLSPEKYVTSAPMPEPQA | 1 | 3.2128 | 0.3236 | 5 | <a href="#">P04220</a> |
| <a href="#">MUCB_HUMAN</a> | K.YVTSAPMPEPQAPGR.Y    | 1 | 3.4655 | 0.5179 | 5 | <a href="#">P04220</a> |
| <a href="#">MUCB_HUMAN</a> | R.EGKQVGSVTTDEVEAEAK.F | 1 | 4.4872 | 0.2898 |   | <a href="#">P04220</a> |

4

Serum albumin precursor - Homo sapiens (Human)

|                            |                 |   |        |       |   |                        |
|----------------------------|-----------------|---|--------|-------|---|------------------------|
| <a href="#">ALBU_HUMAN</a> | R.RHPDYSVLLLR.L | 1 | 3.6792 | 0.334 | 1 | <a href="#">P02768</a> |
|----------------------------|-----------------|---|--------|-------|---|------------------------|

|                            |                  |   |        |        |   |                        |
|----------------------------|------------------|---|--------|--------|---|------------------------|
| <a href="#">ALBU_HUMAN</a> | K.AVMDDFAAFVEK.C | 1 | 3.371  | 0.5933 | 2 | <a href="#">P02768</a> |
| <a href="#">ALBU_HUMAN</a> | K.FQNALLVR.Y     | 1 | 2.496  | 0.253  | 2 | <a href="#">P02768</a> |
| <a href="#">ALBU_HUMAN</a> | K.LVNEVTEFAK.T   | 1 | 2.9488 | 0.492  | 2 | <a href="#">P02768</a> |

3

Complement C4-A precursor (Acidic complement C4) [Contains: Complement C4 beta

|                            |                          |   |        |        |   |                        |
|----------------------------|--------------------------|---|--------|--------|---|------------------------|
| <a href="#">CO4A_HUMAN</a> | R.GLQDEDGYR.M            | 1 | 2.8407 | 0.4582 | 3 | <a href="#">P0C0L4</a> |
| <a href="#">CO4A_HUMAN</a> | R.VTASDPLDTLGSEGALSPGG\1 | 1 | 3.7844 | 0.5837 | 3 | <a href="#">P0C0L4</a> |
| <a href="#">CO4A_HUMAN</a> | R.VGDTLNLNLR.A           | 1 | 3.3181 | 0.3626 | 3 | <a href="#">P0C0L4</a> |

Ig alpha-2 chain C region - Homo sapiens (Human)

|                             |                       |   |        |        |    |                        |
|-----------------------------|-----------------------|---|--------|--------|----|------------------------|
| <a href="#">IGHA2_HUMAN</a> | R.QEPSQGTTTFAVTSILR.V | 1 | 3.4094 | 0.5602 | 21 | <a href="#">P01877</a> |
| <a href="#">IGHA2_HUMAN</a> | R.GFSPKDVLR.W         | 1 | 2.7185 | 0.3404 | 23 | <a href="#">P01877</a> |
| <a href="#">IGHA2_HUMAN</a> | R.WLQGSQELPR.E        | 1 | 2.7793 | 0.3408 | 23 | <a href="#">P01877</a> |

Kininogen-1 precursor (Alpha-2-thiol proteinase inhibitor) [Contains: Kininogen-1 heavy

|                            |                 |   |        |        |   |                        |
|----------------------------|-----------------|---|--------|--------|---|------------------------|
| <a href="#">KNG1_HUMAN</a> | K.TVGSDFYFSFK.Y | 1 | 3.2349 | 0.5678 |   | <a href="#">P01042</a> |
| <a href="#">KNG1_HUMAN</a> | K.KYFIDFVAR.E   | 1 | 2.4739 | 0.3494 | 1 | <a href="#">P01042</a> |
| <a href="#">KNG1_HUMAN</a> | K.YFIDFVAR.E    | 1 | 2.7463 | 0.4936 | 1 | <a href="#">P01042</a> |

2

Apolipoprotein A-II precursor (ApoA-II) (ApoA-II) [Contains: Apolipoprotein A-II(1-76)] -

|                             |                 |   |        |        |  |                        |
|-----------------------------|-----------------|---|--------|--------|--|------------------------|
| <a href="#">APOA2_HUMAN</a> | K.VKSPELQAEAK.S | 1 | 3.2396 | 0.3399 |  | <a href="#">P02652</a> |
| <a href="#">APOA2_HUMAN</a> | K.SPELQAEAK.S   | 1 | 3.151  | 0.3134 |  | <a href="#">P02652</a> |

Hypothetical protein - Homo sapiens (Human)

|                              |                        |   |        |        |    |                        |
|------------------------------|------------------------|---|--------|--------|----|------------------------|
| <a href="#">A0A5E5_HUMAN</a> | R.TVAAPSVFIFPPSDEQLK.S | 2 | 2.8274 | 0.4395 | 21 | <a href="#">A0A5E5</a> |
|------------------------------|------------------------|---|--------|--------|----|------------------------|

Hypothetical protein DKFZp686O01196 - Homo sapiens (Human)

|                              |                      |   |        |        |    |                        |
|------------------------------|----------------------|---|--------|--------|----|------------------------|
| <a href="#">Q6N094_HUMAN</a> | K.TTPVLDSDGSFFLYSK.L | 1 | 2.9694 | 0.4475 | 19 | <a href="#">Q6N094</a> |
| <a href="#">Q6N094_HUMAN</a> | K.GPSVFPLAPSSK.S     | 1 | 2.5384 | 0.4339 | 20 | <a href="#">Q6N094</a> |

IGHM protein - Homo sapiens (Human)

|                              |                      |   |        |        |   |                        |
|------------------------------|----------------------|---|--------|--------|---|------------------------|
| <a href="#">Q6GMY2_HUMAN</a> | K.QVSGSVTTDQVQAEAK.E | 1 | 4.1407 | 0.6249 | 4 | <a href="#">Q6GMY2</a> |
| <a href="#">Q6GMY2_HUMAN</a> | K.YAATSQVLLPSK.D     | 1 | 3.3104 | 0.4058 | 3 | <a href="#">Q6GMY2</a> |

Serum amyloid P-component precursor (SAP) (9.5S alpha-1-glycoprotein) [Contains: S

|                            |                   |   |        |        |  |                        |
|----------------------------|-------------------|---|--------|--------|--|------------------------|
| <a href="#">SAMP_HUMAN</a> | K.IVLGQEQDSYGGK.F | 1 | 3.4325 | 0.381  |  | <a href="#">P02743</a> |
| <a href="#">SAMP_HUMAN</a> | R.QGYFVEAQP.K.I   | 1 | 2.982  | 0.4275 |  | <a href="#">P02743</a> |

1

Alpha-2-HS-glycoprotein precursor (Fetuin-A) (Alpha-2-Z-globulin) (Ba-alpha-2-glycopro

|                             |                |   |        |        |  |                        |
|-----------------------------|----------------|---|--------|--------|--|------------------------|
| <a href="#">FETUA_HUMAN</a> | K.HTLNQIDEVK.V | 1 | 3.3442 | 0.4234 |  | <a href="#">P02765</a> |
|-----------------------------|----------------|---|--------|--------|--|------------------------|

Alpha-2-macroglobulin precursor (Alpha-2-M) - Homo sapiens (Human)

|                            |                 |   |        |        |  |                        |
|----------------------------|-----------------|---|--------|--------|--|------------------------|
| <a href="#">A2MG_HUMAN</a> | K.AIGYLNTGYQR.Q | 1 | 2.6834 | 0.4142 |  | <a href="#">P01023</a> |
|----------------------------|-----------------|---|--------|--------|--|------------------------|

AMBIP protein precursor [Contains: Alpha-1-microglobulin (Protein HC) (Complex-formii

|                             |                  |   |        |        |  |                        |
|-----------------------------|------------------|---|--------|--------|--|------------------------|
| <a href="#">AMBIP_HUMAN</a> | R.AFIQLWAFDAVK.G | 1 | 3.8391 | 0.4943 |  | <a href="#">P02760</a> |
|-----------------------------|------------------|---|--------|--------|--|------------------------|

Clusterin precursor (Complement-associated protein SP-40,40) (Complement cytolysis

|                            |                 |   |        |        |   |                        |
|----------------------------|-----------------|---|--------|--------|---|------------------------|
| <a href="#">CLUS_HUMAN</a> | R.ELDESLQVAER.L | 1 | 3.2778 | 0.4208 | 1 | <a href="#">P10909</a> |
|----------------------------|-----------------|---|--------|--------|---|------------------------|

Complement C1s subcomponent precursor (EC 3.4.21.42) (C1 esterase) [Contains: Cc

|                           |                 |   |        |        |  |                        |
|---------------------------|-----------------|---|--------|--------|--|------------------------|
| <a href="#">C1S_HUMAN</a> | R.TNFDNDIALVR.L | 1 | 2.9965 | 0.4325 |  | <a href="#">P09871</a> |
|---------------------------|-----------------|---|--------|--------|--|------------------------|

IGHA1 protein - Homo sapiens (Human)

|                              |                     |   |        |        |    |                        |
|------------------------------|---------------------|---|--------|--------|----|------------------------|
| <a href="#">Q8N5K4_HUMAN</a> | R.DASGVTFWTTPSSGK.S | 1 | 4.8686 | 0.5423 | 12 | <a href="#">Q8N5K4</a> |
|------------------------------|---------------------|---|--------|--------|----|------------------------|

IGLV2-14 protein - Homo sapiens (Human)

|                              |                     |   |        |        |    |                        |
|------------------------------|---------------------|---|--------|--------|----|------------------------|
| <a href="#">A0A5C9_HUMAN</a> | K.YAASSYLSLTPEQWK.S | 1 | 4.9738 | 0.6582 | 29 | <a href="#">A0A5C9</a> |
|------------------------------|---------------------|---|--------|--------|----|------------------------|

Immunoglobulin J chain - Homo sapiens (Human)

|                           |                  |   |        |        |  |                        |
|---------------------------|------------------|---|--------|--------|--|------------------------|
| <a href="#">IGJ_HUMAN</a> | R.SSEDPNEDIVER.N | 1 | 3.0033 | 0.3247 |  | <a href="#">P01591</a> |
|---------------------------|------------------|---|--------|--------|--|------------------------|

Latrophilin-2 (Fragment) - Homo sapiens (Human)

|                                                                                           |                        |   |        |        |                          |
|-------------------------------------------------------------------------------------------|------------------------|---|--------|--------|--------------------------|
| <a href="#">Q9UJ49 HUMAN</a>                                                              | -MTGNYLLTNPLLR.P       | 1 | 2.6732 | 0.3671 | <a href="#">Q9UJ49</a>   |
| Serum paraoxonase/arylesterase 1 (EC 3.1.1.2) (EC 3.1.8.1) (PON 1) (Serum aryldialk       |                        |   |        |        |                          |
| <a href="#">PON1 HUMAN</a>                                                                | K.IFFYDSENPPASEVLR.I   | 1 | 5.4049 | 0.5888 | <a href="#">P27169</a>   |
| Transcription factor-like 5 protein (Cha transcription factor) (HPV-16 E2-binding protein |                        |   |        |        |                          |
| <a href="#">TCFL5 HUMAN</a>                                                               | R.MLLSEAGAAEKTSGGGDG/1 |   | 3.4634 | 0.1908 | 1 <a href="#">Q9UL49</a> |

1

ha chain; C3a anaphylatoxin; Complement C3b alpha' chain; Complement C3c alpha' chain fragment

Complement component C9b] - Homo sapiens (Human)

Homo sapiens (Human)

Serum amyloid P-component(1-203)] - Homo sapiens (Human)

inhibitor heavy chain 4) (Inter-alpha-trypsin inhibitor family heavy chain-related protein) (IHRP) (Plas  
rotein) [Contains: Alpha-2-HS-glycoprotein chain A; Alpha-2-HS-glycoprotein chain B] - Homo sapien  
Homo sapiens (Human)  
ns (Human)

chain; Bradykinin (Kallidin I); Lysyl-bradykinin (Kallidin II); Kininogen-1 light chain; Low molecular w  
rs (Human)  
no sapiens (Human)

cting inhibitor of NF-kappaB) (SINK) - Homo sapiens (Human)

ha chain; C3a anaphylatoxin; Complement C3b alpha' chain; Complement C3c alpha' chain fragmer

lomo sapiens (Human)

] - Homo sapiens (Human)

inhibitor) (CLI) (NA1/NA2) (Apolipoprotein J) (Apo-J) (Testosterone-repressed prostate message 2)



lement component C9b] - Homo sapiens (Human)

inhibitor heavy chain 4) (Inter-alpha-trypsin inhibitor family heavy chain-related protein) (IHRP) (Plas

chain; Bradykinin (Kallidin I); Lysyl-bradykinin (Kallidin II); Kininogen-1 light chain; Low molecular w

Homo sapiens (Human)

chain; Complement C4-A alpha chain; C4a anaphylatoxin; C4b-A; C4d-A; Complement C4 gamma c

inhibitor heavy chain 1) (Inter-alpha-trypsin inhibitor complex component III) (Serum-derived hyalur

mo sapiens (Human)

otein) [Contains: Alpha-2-HS-glycoprotein chain A; Alpha-2-HS-glycoprotein chain B] - Homo sapien

r subcomponent) [Contains: Complement C1r subcomponent heavy chain; Complement C1r subcor

0L) - Homo sapiens (Human)

sapiens (Human)

N polypeptide 1) (Carboxypeptidase N small subunit) (Lysine carboxypeptidase) (Arginine carboxypeptidase N 83 kDa chain) (Carboxypeptidase N regulatory subunit) (Carboxypeptidase N large sub

2) (HLS2) - Homo sapiens (Human)

omo sapiens (Human)

inhibitor heavy chain 2) (Inter-alpha-trypsin inhibitor complex component II) (Serum-derived hyaluronin factor) [Contains: Plasma kallikrein heavy chain; Plasma kallikrein light chain] - Homo sapiens (Hu

ylphosphatase 1) (A-esterase 1) (Aromatic esterase 1) (K-45) - Homo sapiens (Human)

]-less] - Homo sapiens (Human)

natrix receptor-III) (ECMR-III) (GP90 lymphocyte homing/adhesion receptor) (Hermes antigen) (Hya

o sapiens (Human)

r chain neuron-specific 1) - Homo sapiens (Human)

V65 subunit; Vitronectin V10 subunit; Somatomedin B] - Homo sapiens (Human)

rs (Human)

ens (Human)

cadherin) (P105) - Homo sapiens (Human)

) (CaMK IV) - Homo sapiens (Human)

MAP kinase scaffold protein 1) (Islet-brain 1) (IB-1) (Mitogen-activated protein kinase 8-interactin  
plement C1s subcomponent heavy chain; Complement C1s subcomponent light chain] - Homo sa  
chain; Complement C4-B alpha chain; C4a anaphylatoxin; C4b-B; C4d-B; Complement C4 gamma c

2 subunit alpha) (eIF-2-alpha) (EIF-2alpha) (EIF-2A) - Homo sapiens (Human)

RNA-binding protein Q99) - Homo sapiens (Human)

omo sapiens (Human)

otide-exchange protein 100) (ADP-ribosylation factors guanine nucleotide-exchange protein 2) (Bref

rotein 2) - Homo sapiens (Human)

on termination factor-like protein) (mTERFL) - Homo sapiens (Human)

A125) (CA-125) - Homo sapiens (Human)

rs (Human)

(Human)

P3-like protein) - Homo sapiens (Human)

ibiting factor) - Homo sapiens (Human)

21) (Serpine A10) - Homo sapiens (Human)

le fragment 1; Activation peptide fragment 2; Thrombin light chain; Thrombin heavy chain] - Homo sapiens

1 response element-TATA box-binding protein) (HSP27 ERE-TATA-binding protein) - Homo sapiens

iens (Human)

iens (Human)

omo sapiens (Human)

n) (C-SAA) - Homo sapiens (Human)

uman)

rand antigen II)] - Homo sapiens (Human)

inhibitor heavy chain 1) (Inter-alpha-trypsin inhibitor complex component III) (Serum-derived hyalurc



inhibitor heavy chain 2) (Inter-alpha-trypsin inhibitor complex component II) (Serum-derived hyaluroi

ha chain; C3a anaphylatoxin; Complement C3b alpha' chain; Complement C3c alpha' chain fragmer

homo sapiens (Human)

chain; Bradykinin (Kallidin I); Lysyl-bradykinin (Kallidin II); Kininogen-1 light chain; Low molecular w

chain; Complement C4-A alpha chain; C4a anaphylatoxin; C4b-A; C4d-A; Complement C4 gamma c

] - Homo sapiens (Human)

inhibitor heavy chain 4) (Inter-alpha-trypsin inhibitor family heavy chain-related protein) (IHRP) (Plas

siens (Human)

ylphosphatase 1) (A-esterase 1) (Aromatic esterase 1) (K-45) - Homo sapiens (Human)

Complement C1s subcomponent heavy chain; Complement C1s subcomponent light chain] - Homo sa

erum amyloid P-component(1-203)] - Homo sapiens (Human)

mo sapiens (Human)

ng glycoprotein heterogeneous in charge) (Alpha-1 microglycoprotein); Inter-alpha-trypsin inhibitor li

inhibitor heavy chain 3) (Serum-derived hyaluronan-associated protein) (SHAP) - Homo sapiens (Hu

V65 subunit; Vitronectin V10 subunit; Somatomedin B] - Homo sapiens (Human)

Homo sapiens (Human)

ns (Human)

inhibitor) (CLI) (NA1/NA2) (Apolipoprotein J) (Apo-J) (Testosterone-repressed prostate message 2)

r subcomponent) [Contains: Complement C1r subcomponent heavy chain; Complement C1r subcor

lement component C9b] - Homo sapiens (Human)

?) (HLS2) - Homo sapiens (Human)

o sapiens (Human)

(Human)

le fragment 1; Activation peptide fragment 2; Thrombin light chain; Thrombin heavy chain] - Homo s:

it rpn11) (26S proteasome-associated PAD1 homolog 1) - Homo sapiens (Human)

an)

-lyase 6) (Adenylyl cyclase 6) (Ca(2+)-inhibitable adenylyl cyclase) - Homo sapiens (Human)

ens (Human)

n-2 (Angiotensin II) (Ang II); Angiotensin-3 (Angiotensin III) (Ang III) (Des-Asp[1]-angiotensin II)] - H

oL) - Homo sapiens (Human)

Human)

1) (p200 ARF-GEP1) (p200 ARF guanine nucleotide exchange factor) - Homo sapiens (Human)

an)

an)

a mRNA. (Fragment) - Homo sapiens (Human)

sapiens (Human)

iens (Human)

- Homo sapiens (Human)



ens (Human)

omo sapiens (Human)

pha-IEL) (CD103 antigen) [Contains: Integrin alpha-E light chain; Integrin alpha-E heavy chain] - Ho  
r chain neuron-specific 1) - Homo sapiens (Human)

omo sapiens (Human)

0) (gp330) - Homo sapiens (Human)

l gene sequences - Homo sapiens (Human)

rs (Human)

atase FYVE-DSP2) - Homo sapiens (Human)



rand antigen II)] - Homo sapiens (Human)

IG1) (Zinc finger and BTB domain-containing protein 22A) - Homo sapiens (Human)

is T-cell lymphoma-associated antigen se33-1) (CTCL tumor antigen se33-1) - Homo sapiens (Hum:

inhibitor heavy chain 2) (Inter-alpha-trypsin inhibitor complex component II) (Serum-derived hyaluroi

ha chain; C3a anaphylatoxin; Complement C3b alpha' chain; Complement C3c alpha' chain fragmer

lomo sapiens (Human)

·inhibitor heavy chain 1) (Inter-alpha-trypsin inhibitor complex component III) (Serum-derived hyalurc

·inhibitor heavy chain 3) (Serum-derived hyaluronan-associated protein) (SHAP) - Homo sapiens (Ht

chain; Complement C4-A alpha chain; C4a anaphylatoxin; C4b-A; C4d-A; Complement C4 gamma c

chain; Bradykinin (Kallidin I); Lysyl-bradykinin (Kallidin II); Kininogen-1 light chain; Low molecular w

iens (Human)

] - Homo sapiens (Human)

inhibitor) (CLI) (NA1/NA2) (Apolipoprotein J) (Apo-J) (Testosterone-repressed prostate message 2)

erum amyloid P-component(1-203)] - Homo sapiens (Human)

ylphosphatase 1) (A-esterase 1) (Aromatic esterase 1) (K-45) - Homo sapiens (Human)

V65 subunit; Vitronectin V10 subunit; Somatomedin B] - Homo sapiens (Human)

ng glycoprotein heterogeneous in charge) (Alpha-1 microglycoprotein); Inter-alpha-trypsin inhibitor li

rotein) [Contains: Alpha-2-HS-glycoprotein chain A; Alpha-2-HS-glycoprotein chain B] - Homo sapiens

Homo sapiens (Human)

plement C1s subcomponent heavy chain; Complement C1s subcomponent light chain] - Homo sapiens

active factor serine protease p100) (RaRF) (Mannan-binding lectin serine protease 1) (Mannose-binding

inhibitor heavy chain 4) (Inter-alpha-trypsin inhibitor family heavy chain-related protein) (IHRP) (Plasminogen

in) (Human)

le fragment 1; Activation peptide fragment 2; Thrombin light chain; Thrombin heavy chain] - Homo sapiens

a adipocyte complement-related protein) (Adipocyte complement-related 30 kDa protein) (ACRP30)

in) (Human)

Human)

: AUTOANTIGEN B - Homo sapiens (Human)

sapiens (Human)



CHD8) (CHD-8) (Helicase with SNF2 domain 1) - Homo sapiens (Human)

lement component C9b] - Homo sapiens (Human)

gen domain-containing lectin 3 p35) (Hakata antigen) - Homo sapiens (Human)

omo sapiens (Human)

gase URE-B1) (Mcl-1 ubiquitin ligase E3) (Mule) (ARF-binding protein 1) (ARF-BP1) - Homo sapiens

2) (HLS2) - Homo sapiens (Human)

io sapiens (Human)

(hLAT2) - Homo sapiens (Human)

1 gene sequences - Homo sapiens (Human)

(Human)

1atase FYVE-DSP2) - Homo sapiens (Human)

P3-like protein) - Homo sapiens (Human)

or regulatory protein) (Prostaglandin F2-alpha receptor-associated protein) (CD9 partner 1) (CD9P-1

n)

(Rhomboid veinlet-like protein 6) - Homo sapiens (Human)

n) (C-SAA) - Homo sapiens (Human)

chain; Complement C4-A alpha chain; C4a anaphylatoxin; C4b-A; C4d-A; Complement C4 gamma c

inhibitor heavy chain 2) (Inter-alpha-trypsin inhibitor complex component II) (Serum-derived hyaluroi

ha chain; C3a anaphylatoxin; Complement C3b alpha' chain; Complement C3c alpha' chain fragmer

inhibitor heavy chain 1) (Inter-alpha-trypsin inhibitor complex component III) (Serum-derived hyalurc

lomo sapiens (Human)

plement C1s subcomponent heavy chain; Complement C1s subcomponent light chain] - Homo sa

inhibitor heavy chain 3) (Serum-derived hyaluronan-associated protein) (SHAP) - Homo sapiens (Ht

ng glycoprotein heterogeneous in charge) (Alpha-1 microglycoprotein); Inter-alpha-trypsin inhibitor li

iens (Human)

Homo sapiens (Human)

erum amyloid P-component(1-203)] - Homo sapiens (Human)

V65 subunit; Vitronectin V10 subunit; Somatomedin B] - Homo sapiens (Human)

] - Homo sapiens (Human)

chain; Bradykinin (Kallidin I); Lysyl-bradykinin (Kallidin II); Kininogen-1 light chain; Low molecular w

rotein) [Contains: Alpha-2-HS-glycoprotein chain A; Alpha-2-HS-glycoprotein chain B] - Homo sapien

inhibitor) (CLI) (NA1/NA2) (Apolipoprotein J) (Apo-J) (Testosterone-repressed prostate message 2)

inhibitor heavy chain 4) (Inter-alpha-trypsin inhibitor family heavy chain-related protein) (IHRP) (Plas  
inhibiting factor) - Homo sapiens (Human)

le fragment 1; Activation peptide fragment 2; Thrombin light chain; Thrombin heavy chain] - Homo sa  
apiens (Human)

Homo sapiens (Human)

chain; Complement C4-B alpha chain; C4a anaphylatoxin; C4b-B; C4d-B; Complement C4 gamma c  
lement component C9b] - Homo sapiens (Human)

active factor serine protease p100) (RaRF) (Mannan-binding lectin serine protease 1) (Mannose-bin  
ein) (TAXREB302) - Homo sapiens (Human)

ein 1) - Homo sapiens (Human)

in 71) (ZNF47) - Homo sapiens (Human)

:TCL tumor antigen se1-1) (CLL-associated antigen KW-11) (Renal carcinoma antigen NY-REN-53)  
o sapiens (Human)



nyosin heavy chain IIb) (NMMHC II-b) (NMMHC-IIB) (Cellular myosin heavy chain, type B) (Nonmus  
(Human)

P3-like protein) - Homo sapiens (Human)

ylphosphatase 1) (A-esterase 1) (Aromatic esterase 1) (K-45) - Homo sapiens (Human)

chain; Complement C4-A alpha chain; C4a anaphylatoxin; C4b-A; C4d-A; Complement C4 gamma c

·inhibitor heavy chain 1) (Inter-alpha-trypsin inhibitor complex component III) (Serum-derived hyalurc

·inhibitor heavy chain 2) (Inter-alpha-trypsin inhibitor complex component II) (Serum-derived hyaluroi

lomo sapiens (Human)

ha chain; C3a anaphylatoxin; Complement C3b alpha' chain; Complement C3c alpha' chain fragmer

erum amyloid P-component(1-203)] - Homo sapiens (Human)

omplement C1s subcomponent heavy chain; Complement C1s subcomponent light chain] - Homo sa

inhibitor heavy chain 3) (Serum-derived hyaluronan-associated protein) (SHAP) - Homo sapiens (Hu

iens (Human)

rotein) [Contains: Alpha-2-HS-glycoprotein chain A; Alpha-2-HS-glycoprotein chain B] - Homo sapien

Homo sapiens (Human)

inhibitor) (CLI) (NA1/NA2) (Apolipoprotein J) (Apo-J) (Testosterone-repressed prostate message 2)

chain; Bradykinin (Kallidin I); Lysyl-bradykinin (Kallidin II); Kininogen-1 light chain; Low molecular w

ns (Human)

ylphosphatase 1) (A-esterase 1) (Aromatic esterase 1) (K-45) - Homo sapiens (Human)

V65 subunit; Vitronectin V10 subunit; Somatomedin B] - Homo sapiens (Human)

ng glycoprotein heterogeneous in charge) (Alpha-1 microglycoprotein); Inter-alpha-trypsin inhibitor li

peptidase N 83 kDa chain) (Carboxypeptidase N regulatory subunit) (Carboxypeptidase N large sub

lement component C9b] - Homo sapiens (Human)

inhibitor heavy chain 4) (Inter-alpha-trypsin inhibitor family heavy chain-related protein) (IHRP) (Plas

ein 1) (Syne-1) (Myocyte nuclear envelope protein 1) (Myne-1) (Enaptin) - Homo sapiens (Human)

le fragment 1; Activation peptide fragment 2; Thrombin light chain; Thrombin heavy chain] - Homo sa

(Intramembrane protease 4) (IMP4) (Presenilin-like protein 1) - Homo sapiens (Human)

arbonate cotransporter 2b) (Bicarbonate transporter) (Solute carrier family 4 member 7) - Homo sap

SIII subunit C) (SIII p15) (Elongin-C) (EloC) (Elongin 15 kDa subunit) - Homo sapiens (Human)

cting inhibitor of NF-kappaB) (SINK) - Homo sapiens (Human)

inhibitor heavy chain 1) (Inter-alpha-trypsin inhibitor complex component III) (Serum-derived hyaluric

inhibitor heavy chain 2) (Inter-alpha-trypsin inhibitor complex component II) (Serum-derived hyaluronic

homo sapiens (Human)

heavy chain; C3a anaphylatoxin; Complement C3b alpha' chain; Complement C3c alpha' chain fragment

chain; Complement C4-A alpha chain; C4a anaphylatoxin; C4b-A; C4d-A; Complement C4 gamma c

chain; Bradykinin (Kallidin I); Lysyl-bradykinin (Kallidin II); Kininogen-1 light chain; Low molecular w

Homo sapiens (Human)

erum amyloid P-component(1-203)] - Homo sapiens (Human)

otein) [Contains: Alpha-2-HS-glycoprotein chain A; Alpha-2-HS-glycoprotein chain B] - Homo sapien

ng glycoprotein heterogeneous in charge) (Alpha-1 microglycoprotein); Inter-alpha-trypsin inhibitor li

inhibitor) (CLI) (NA1/NA2) (Apolipoprotein J) (Apo-J) (Testosterone-repressed prostate message 2)

omplement C1s subcomponent heavy chain; Complement C1s subcomponent light chain] - Homo sa

ylphosphatase 1) (A-esterase 1) (Aromatic esterase 1) (K-45) - Homo sapiens (Human)

1) (E2BP-1) - Homo sapiens (Human)



it 1; Complement C3dg fragment; Complement C3g fragment; Complement C3d fragment; Com

uma kallikrein sensitive glycoprotein 120) (PK-120) (GP120) [Co

s (Human)

eight growth-promoting factor] - Homo sapiens (Human)

it 1; Complement C3dg fragment; Complement C3g fragment; Complement C3d fragment; Com



(TRPM-2) [Contains: Clusterin beta chain (ApoJalpha) (Complement cytotoxicity

uma kallikrein sensitive glycoprotein 120) (PK-120) (GP120) [Co

eight growth-promoting factor] - Homo sapiens (Human)

chain] - Homo sapiens (Human)

nan-associated protein) (SHAP) - Homo sapiens (Human)

s (Human)

nponent light chain] - Homo sapiens (Human)

ptidase) (Kininase-1) (Serum carboxypeptidase N) (SCPN) (Anaphylatoxin inac

unit) - Homo sapiens (Human)

nan-associated protein) (SHAP) - Homo sapiens (Human)

uman)



luronate receptor) (Heparan sulfate proteoglycan) (Epican) (CDw44) - Homo s

g protein 1) - Homo sapiens (Human)

piens (Human)

:hain] - Homo sapiens (Human)

feldin-resistant Arf-GEF 2 protein) - Homo sapiens (Human)

apiens (Human)

(Human)

nan-associated protein) (SHAP) - Homo sapiens (Human)

nan-associated protein) (SHAP) - Homo sapiens (Human)

it 1; Complement C3dg fragment; Complement C3g fragment; Complement C3d fragment; Com

eight growth-promoting factor] - Homo sapiens (Human)

chain] - Homo sapiens (Human)



uma kallikrein sensitive glycoprotein 120) (PK-120) (GP120) [Co

piens (Human)

ght chain (ITI-LC) (Bikunin) (HI-30)] - Homo sapiens (Human)

uman)

(TRPM-2) [Contains: Clusterin beta chain (ApoJalpha) (Complement cytolysis

Component light chain] - Homo sapiens (Human)

apiens (Human)

omo sapiens (Human)

omo sapiens (Human)

; N-acetylglutamate synthase conserved domain form] - Homo sapiens (Human

) - Homo sapiens (Human)

(Human)

human)

beta) - Homo sapiens (Human)

an)

nan-associated protein) (SHAP) - Homo sapiens (Human)

it 1; Complement C3dg fragment; Complement C3g fragment; Complement C3d fragment; Com



nan-associated protein) (SHAP) - Homo sapiens (Human)

uman)

chain] - Homo sapiens (Human)

eight growth-promoting factor] - Homo sapiens (Human)

(TRPM-2) [Contains: Clusterin beta chain (ApoJalpha) (Complement cytolysis

ght chain (ITI-LC) (Bikunin) (HI-30)] - Homo sapiens (Human)

s (Human)

piens (Human)

ding protein-associated serine protease) (MASP-1) (Serine protease 5) [Con

uma kallikrein sensitive glycoprotein 120) (PK-120) (GP120) [Co

apiens (Human)

(Adipose most abundant gene transcript 1) (apM-1) (Gelatin-binding protein)

;(Human)

I) (CD315 antigen) - Homo sapiens (Human)

chain] - Homo sapiens (Human)

nan-associated protein) (SHAP) - Homo sapiens (Human)

it 1; Complement C3dg fragment; Complement C3g fragment; Complement C3d fragment; Com



nan-associated protein) (SHAP) - Homo sapiens (Human)

piens (Human)

uman)

ght chain (ITI-LC) (Bikunin) (HI-30)] - Homo sapiens (Human)

eight growth-promoting factor] - Homo sapiens (Human)

s (Human)

(TRPM-2) [Contains: Clusterin beta chain (ApoJalpha) (Complement cytolysis

uma kallikrein sensitive glycoprotein 120) (PK-120) (GP120) [Co

sapiens (Human)

chain] - Homo sapiens (Human)

ding protein-associated serine protease) (MASP-1) (Serine protease 5) [Con

- Homo sapiens (Human)

cle myosin heavy chain-B) (NMMHC-B) - Homo sapiens (Human)

chain] - Homo sapiens (Human)

nan-associated protein) (SHAP) - Homo sapiens (Human)

nan-associated protein) (SHAP) - Homo sapiens (Human)

it 1; Complement C3dg fragment; Complement C3g fragment; Complement C3d fragment; Com

piens (Human)

uman)

s (Human)

(TRPM-2) [Contains: Clusterin beta chain (ApoJalpha) (Complement cytolysis

eight growth-promoting factor] - Homo sapiens (Human)

ght chain (ITI-LC) (Bikunin) (HI-30)] - Homo sapiens (Human)



unit) - Homo sapiens (Human)

uma kallikrein sensitive glycoprotein 120) (PK-120) (GP120) [Co

apiens (Human)

iens (Human)

nan-associated protein) (SHAP) - Homo sapiens (Human)

nan-associated protein) (SHAP) - Homo sapiens (Human)

it 1; Complement C3dg fragment; Complement C3g fragment; Complement C3d fragment; Com

chain] - Homo sapiens (Human)

eight growth-promoting factor] - Homo sapiens (Human)

s (Human)

ght chain (ITI-LC) (Bikunin) (HI-30)] - Homo sapiens (Human)

(TRPM-2) [Contains: Clusterin beta chain (ApoJalpha) (Complement cytolysis  
piens (Human)
